# Supplementary material for: Copper(i) chloride promoted Csp2–N cross-coupling of 1,2-di(pyrimidin-2-yl) disulfides with amines: an efficient approach to obtain C2-amino functionalized pyrimidines
Source: Royal Society of Chemistry journal article supplement (doi:10.1039/c5ob02535d), 2016-01-01

## Supporting Information

# Copper(I) Chloride Salt Catalyzed Csp<sup>2</sup>-N Cross-Coupling of Disulfides with Amines: An Efficient Approach to C2-Functionalized Pyrimidines

E-mail: quanzhengjun@hotmail.com, wangxicun@nwnu.edu.cn

### Table of Contents

|                                                                       |     |
|-----------------------------------------------------------------------|-----|
| Table of contents .....                                               | s0  |
| General .....                                                         | s1  |
| Experimental details and characterization data for all Products ..... | s2  |
| References .....                                                      | s15 |
| Copies of the NMR Spectra for All Products .....                      | s16 |

## 1. General

<sup>1</sup>H NMR and <sup>13</sup>C NMR data analyses were performed with a Varian Mercury plus-400 instrument and plus-600 instrument unless otherwise specified. Dual-beam infrared spectrophotometer CDCl<sub>3</sub> as solvent and tetramethylsilane (TMS) as the internal standard were employed. Chemical shifts were reported in units (ppm) by assigning TMS resonance in the <sup>1</sup>H NMR spectrum as 0.00 ppm. The data of <sup>1</sup>H NMR was reported as follows: chemical shift, multiplicity (s = singlet, d = doublet, t = triplet, m = multiplet and br = broad), coupling constant (J values) in Hz and integration. Chemical shift for <sup>13</sup>C NMR spectra were recorded in ppm from TMS using the central peak of CDCl<sub>3</sub> (77.0 ppm) as the internal standard. Flash chromatography was performed using 200-300 mesh silica gel with the indicated solvent system according to standard techniques. Analytical thin-layer chromatography (TLC) was performed on pre-coated, glass-backed silica gel plates. Melting points were measured with an XT-4 apparatus. High-resolution mass spectra (HRMS) (ESI) were obtained with a Bruker Daltonics APEX II 47e and Orbitrap Elite mass spectrometer. Column chromatography was generally performed on silica gel (200–300 mesh) and TLC analyses were conducted on silica gel GF254 plates.

## 2. Experimental details and characterization data for all products.

**2.1 Synthesis of unsymmetrical disulfides 6a and 6b.** The mixture of ethyl 6-methyl-4-aryl-2-thioxo-1,2,3,4-tetrahydropyrimidine-5-carboxylate (5 mmol), *p*-toluenethiol (5 mmol), 2,3-dichloro-5,6-dicyano-1,4-benzoquinone (5 mmol) and NaH (5 mmol) in dioxane (15.0 mL) in 100 mL round-bottom flask was stirred at rt for 5 min. Then, 2 mL diluted hydrochloric acid was added to the mixture to quench the reaction and extracted with ethyl acetate (3×25 mL). The combined organic layers were washed with aqueous NaHCO<sub>3</sub> and brine, dried over MgSO<sub>4</sub>, filtered, and the volatiles were removed in vacuo. The residue was purified by column chromatography on silica gel (ethyl acetate/ petroleum ether 1:10) to give the product.

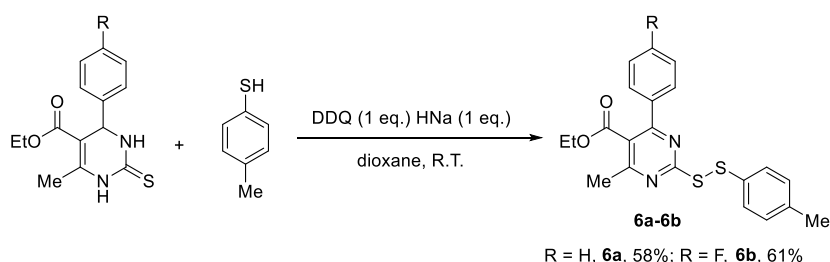

**2.2 General procedure for the synthesis of 3a.** Under an atmosphere of nitrogen, disulfide<sup>1</sup> **1a** (1 mmol, 0.546g), aniline **2a** (3 mmol, 0.279g), CuCl (1.0 mmol, 0.099g) and K<sub>3</sub>PO<sub>4</sub> (3.0 mmol, 0.637g) were added to an oven-dried Schlenk tube. The tube was stoppered and degassed with nitrogen three times. Water-free xylene (3 mL) was added by syringe and the mixture was stirred for 8 h at 140°C and the reaction was monitored by TLC analysis. Then, 2mL diluted hydrochloric acid were added to the mixture to quench the reaction and extracted with ethyl acetate (3×100 mL). The combined organic layers were washed with aqueous NaHCO<sub>3</sub> and brine, dried over MgSO<sub>4</sub>, filtered, and the volatiles were removed in vacuo. The residue was purified by column chromatography on silica gel (ethyl acetate/ petroleum ether 1:30) to give the corresponding products.

### 2.3 Characterization Data for the Isolated Products.

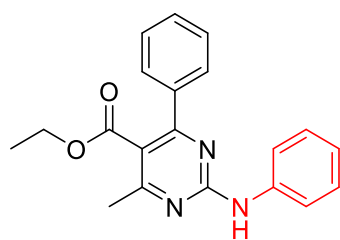

**Ethyl 4-methyl-6-phenyl-2-(phenylamino)pyrimidine-5-carboxylate (3a).**<sup>2</sup> Colorless oil. IR (KBr): 3325 (s), 2983 (m), 1716 (s), 1550 (s), 1383 (s), 1160 (m), 1050 (s), 585 (m) cm<sup>-1</sup>. <sup>1</sup>H NMR (400 MHz, CDCl<sub>3</sub>) δ 7.67-7.62 (m, 5H), 7.44 (d, *J* = 4.8 Hz, 3H), 7.32 (t, *J* = 7.6 Hz, 2H), 7.04 (t, *J* = 7.2 Hz, 1H), 4.11 (q, *J* = 7.2 Hz, 2H), 2.57 (s, 3H), 1.00 (t, *J* = 6.8 Hz, 3H); <sup>13</sup>C NMR (100 MHz, CDCl<sub>3</sub>) δ 168.41, 167.17, 165.73, 158.71, 139.01, 138.52, 129.60, 128.71, 128.23, 127.96, 122.57, 119.16, 116.93, 61.19, 22.88, 13.46. HRMS (ESI) *m/z* calcd for C<sub>20</sub>H<sub>19</sub>N<sub>3</sub>O<sub>2</sub> [M + H]<sup>+</sup> 334.1550, found 334.1552.

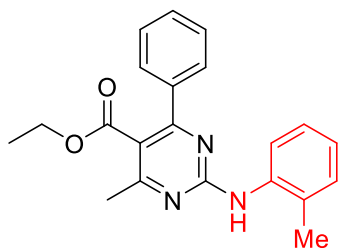

**Ethyl 4-methyl-6-phenyl-2-(o-tolylamino)pyrimidine-5-carboxylate (3b).**<sup>2</sup> Brown oil. IR (KBr): 3315 (s), 2970 (m), 1713 (s), 1655 (m), 1456 (s), 1245 (m), 860 (s)  $\text{cm}^{-1}$ .  $^1\text{H}$  NMR (400 MHz,  $\text{CDCl}_3$ )  $\delta$  8.07 (d,  $J = 8.1$  Hz, 1H), 7.54-7.51(m, 2H), 7.36-7.35 (m, 3H), 7.17 (t,  $J = 3.6$  Hz, 1H), 7.15-7.12 (m, 1H), 7.01 (s, 1H), 6.96 (t,  $J = 7.4$  Hz, 1H), 4.02 (q,  $J = 7.2$  Hz, 2H), 2.47 (s, 3H), 2.26 (s, 3H), 0.91 (t,  $J = 7.2$  Hz, 3H);  $^{13}\text{C}$  NMR (100 MHz,  $\text{CDCl}_3$ )  $\delta$  168.50, 167.26, 165.88, 159.09, 138.59, 136.97, 130.39, 129.63, 128.29, 127.99, 126.50, 123.63, 121.50, 117.02, 61.23, 29.66, 22.92, 18.16, 13.53. HRMS (ESI)  $m/z$  calcd for  $\text{C}_{21}\text{H}_{21}\text{N}_3\text{O}_2$   $[\text{M} + \text{H}]^+$  348.1707, found 348.1710.

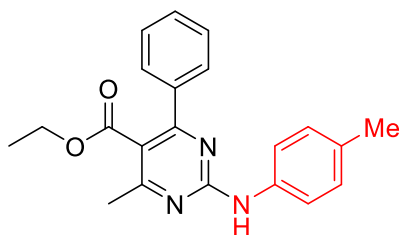

**Ethyl 4-methyl-6-phenyl-2-(p-tolylamino)pyrimidine-5-carboxylate (3c).**<sup>2</sup> Brown oil. IR (KBr): 3318 (s), 2982 (m), 1715 (s), 1552 (s), 1433 (m), 1386 (s), 1160 (m), 1055 (s), 885 (m)  $\text{cm}^{-1}$ .  $^1\text{H}$  NMR (400 MHz,  $\text{CDCl}_3$ )  $\delta$  7.53 (d,  $J = 4.0$  Hz, 2H), 7.45 (d,  $J = 8.0$  Hz, 2H), 7.35 (s, 4H), 7.04 (d,  $J = 8.0$  Hz, 2H), 4.01 (q,  $J = 7.2$  Hz, 2H), 2.47 (s, 3H), 2.23 (s, 3H), 0.90 (t,  $J = 7.2$  Hz, 3H);  $^{13}\text{C}$  NMR (100 MHz,  $\text{CDCl}_3$ )  $\delta$  = 168.49, 167.18, 165.80, 158.87, 138.75, 136.50, 132.26, 129.54, 129.29, 128.22, 128.02, 119.49, 116.84, 61.15, 22.90, 20.70, 13.50. HRMS (ESI)  $m/z$  calcd for  $\text{C}_{21}\text{H}_{21}\text{N}_3\text{O}_2$   $[\text{M} + \text{H}]^+$  348.1707, found 348.1710.

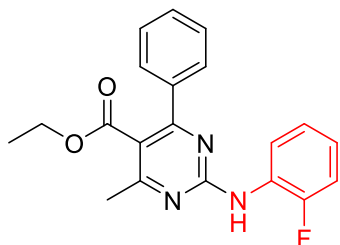

**Ethyl 2-(2-fluorophenylamino)-4-methyl-6-phenylpyrimidine-5-carboxylate (3d).**<sup>2</sup> Colourless oil. IR (KBr): 3322 (s), 2875 (m), 1719 (s), 1550 (s), 1385 (s), 1153 (m), 856 (s), 630 (m)  $\text{cm}^{-1}$ .  $^1\text{H}$  NMR (400 MHz,  $\text{CDCl}_3$ )  $\delta$  8.60 (t,  $J = 8.2$  Hz, 1H), 7.63-7.61 (m, 2H), 7.55 (s, 1H), 7.45-7.43 (m, 3H), 7.15-7.06 (m, 2H), 6.96 (q,  $J = 6.0$  Hz, 1H), 4.11 (q,  $J = 7.2$  Hz, 2H), 2.57 (s, 3H), 0.99 (t,  $J = 7.2$  Hz, 3H);  $^{13}\text{C}$  NMR (100 MHz,  $\text{CDCl}_3$ )  $\delta$  168.28, 167.20, 165.70, 158.47, 153.59, 138.48, 129.67, 128.29, 128.03, 127.68, 124.22, 122.42, 120.61, 117.78, 114.61, 61.26, 22.82, 13.51. HRMS (ESI)  $m/z$  calcd for  $\text{C}_{20}\text{H}_{18}\text{FN}_3\text{O}_2$   $[\text{M} + \text{H}]^+$  352.1456, found 352.1454.

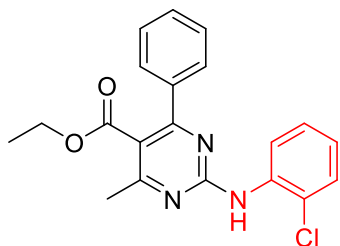

**Ethyl 2-(2-chlorophenylamino)-4-methyl-6-phenylpyrimidine-5-carboxylate (3e).**<sup>2</sup> Light yellow oil. IR (KBr): 3328 (s), 2969 (m), 1724 (s), 1455 (s), 1240 (m), 855 (s)  $\text{cm}^{-1}$ .  $^1\text{H}$  NMR (400 MHz,  $\text{CDCl}_3$ )  $\delta$  = 8.61 (d,  $J$  = 8.4 Hz, 1H), 7.71 (s, 1H), 7.56 (d,  $J$  = 4.8 Hz, 2H), 7.40 (s, 3H), 7.32 (d,  $J$  = 7.6 Hz, 1H), 7.21 (q,  $J$  = 8.4 Hz, 1H), 6.91 (t,  $J$  = 7.0 Hz, 1H), 4.05 (q,  $J$  = 7.2 Hz, 2H), 2.51 (s, 3H), 0.93 (t,  $J$  = 7.0 Hz, 3H);  $^{13}\text{C}$  NMR (100 MHz,  $\text{CDCl}_3$ )  $\delta$  168.33, 167.24, 165.72, 158.48, 138.49, 135.92, 129.77, 129.10, 128.37, 128.13, 127.39, 122.90, 122.52, 120.49, 118.07, 61.35, 22.87, 13.57. HRMS (ESI)  $m/z$  calcd for  $\text{C}_{20}\text{H}_{18}\text{ClN}_3\text{O}_2$  [ $\text{M} + \text{H}$ ]<sup>+</sup> 368.1160, found 368.1163.

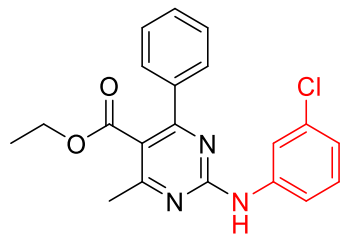

**Ethyl 2-((3-chlorophenyl)amino)-4-methyl-6-phenylpyrimidine-5-carboxylate (3f).** Brown oil. IR (KBr): 3384 (s), 2920 (m), 1720 (s), 1560 (s), 1274 (m), 1084 (s), 670 (m)  $\text{cm}^{-1}$ .  $^1\text{H}$  NMR (600 MHz,  $\text{CDCl}_3$ )  $\delta$  7.87 – 7.85 (m, 1H), 7.80 (s, 1H), 7.65 – 7.63 (m, 2H), 7.44 – 7.40 (m, 4H), 7.19-7.16 (t,  $J$  = 7.8 Hz, 1H), 6.99-6.98 (d,  $J$  = 7.8 Hz, 1H), 4.16-4.12 (q,  $J$  = 7.2 Hz, 2H), 2.58 (s, 3H), 1.03-1.00 (t,  $J$  = 6.6 Hz, 3H);  $^{13}\text{C}$  NMR (150 MHz,  $\text{CDCl}_3$ )  $\delta$  168.37, 167.39, 165.78, 158.56, 140.41, 138.35, 134.44, 129.89, 129.76, 128.43, 128.10, 122.55, 119.18, 117.16, 61.44, 22.98, 13.60. HRMS (ESI)  $m/z$  calcd for  $\text{C}_{20}\text{H}_{18}\text{ClN}_3\text{O}_2$  [ $\text{M} + \text{H}$ ]<sup>+</sup> 368.1160, found 368.1162.

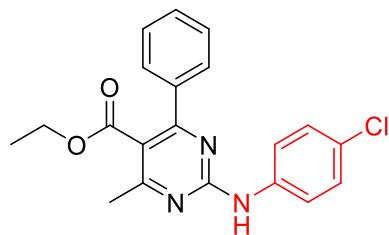

**Ethyl 2-(4-chlorophenylamino)-4-methyl-6-phenylpyrimidine-5-carboxylate (3g).**<sup>2</sup> Colorless oil. IR (KBr): 3285 (s), 2980 (m), 1718 (s), 1455 (s), 1248 (m), 860 (s)  $\text{cm}^{-1}$ .  $^1\text{H}$  NMR (400 MHz,  $\text{CDCl}_3$ )  $\delta$  7.97 (s, 1H), 7.62-7.59 (m, 2H), 7.51 (d,  $J$  = 8.4 Hz, 2H), 7.41 (d,  $J$  = 5.6 Hz, 3H), 7.20 (d,  $J$  = 8.8 Hz, 2H), 4.11 (q,  $J$  = 7.2 Hz, 2H), 2.55 (s, 3H), 0.98 (t,  $J$  = 7.2 Hz, 3H);  $^{13}\text{C}$  NMR (100 MHz,  $\text{CDCl}_3$ )  $\delta$  168.28, 167.24, 165.70, 158.53, 138.30, 137.63, 129.75, 128.60, 128.29, 127.95, 127.32, 120.40, 117.25, 61.30, 22.88, 13.52. HRMS (ESI)  $m/z$  calcd for  $\text{C}_{20}\text{H}_{18}\text{ClN}_3\text{O}_2$  [ $\text{M} + \text{H}$ ]<sup>+</sup> 368.1160, found 368.1157.

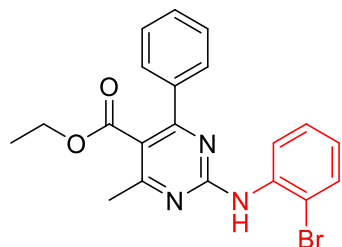

**Ethyl 2-(2-bromophenylamino)-4-methyl-6-phenylpyrimidine-5-carboxylate (3h).**<sup>2</sup> Light yellow oil. IR (KBr): 3235 (s), 2956 (m), 1715 (s), 1545 (m), 1365 (m), 1255 (s), 735 (m), 680 (m)  $\text{cm}^{-1}$ .  $^1\text{H}$  NMR (400 MHz,  $\text{CDCl}_3$ )  $\delta$  = 8.54 (d,  $J$  = 8.0 Hz, 1H), 7.68 (s, 1H), 7.54 (d,  $J$  = 4.8 Hz, 2H), 7.45 (d,  $J$  = 8.0 Hz, 1H), 7.36 (s, 3H), 7.22 (t,  $J$  = 7.8 Hz, 1H), 6.80 (t,  $J$  = 7.6 Hz, 1H), 4.02 (q,  $J$  = 6.8 Hz, 2H), 2.49 (s, 3H), 0.91 (t,  $J$  = 7.0 Hz, 3H);  $^{13}\text{C}$  NMR (100 MHz,  $\text{CDCl}_3$ )  $\delta$  168.28, 167.18, 165.60, 158.40, 138.36, 136.88, 132.31, 129.73, 128.30, 128.05, 127.96,

123.42, 120.71, 117.93, 113.21, 61.30, 22.84, 13.52. HRMS (ESI)  $m/z$  calcd for  $C_{20}H_{18}BrN_3O_2$   $[M + H]^+$  412.0655, found 412.0657.

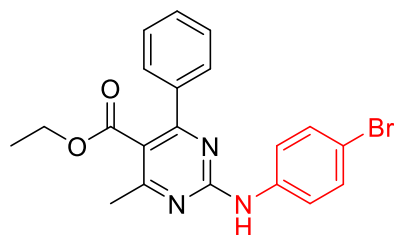

**Ethyl 2-(4-bromophenylamino)-4-methyl-6-phenylpyrimidine-5-carboxylate (3i).**<sup>2</sup> Yellow oil. IR (KBr): 3295 (s), 2895 (m), 1721 (s), 1560 (s), 1365 (m), 755 (m), 680 (m)  $cm^{-1}$ .  $^1H$  NMR (400 MHz,  $CDCl_3$ )  $\delta$  7.59-7.53 (m, 5H), 7.44-7.38 (m, 5H), 4.11 (q,  $J = 6.8$  Hz, 2H), 2.56 (s, 3H), 0.99 (t,  $J = 6.8$  Hz, 3H);  $^{13}C$  NMR (100 MHz,  $CDCl_3$ )  $\delta$  168.31, 167.28, 165.76, 158.48, 138.40, 137.64, 131.70, 129.79, 128.36, 128.00, 120.75, 117.54, 114.99, 61.34, 22.91, 13.54. HRMS (ESI)  $m/z$  calcd for  $C_{20}H_{18}BrN_3O_2$   $[M + H]^+$  412.0655, found 412.0657.

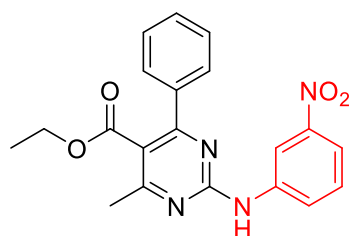

**Ethyl 4-methyl-2-((3-nitrophenyl)amino)-6-phenylpyrimidine-5-carboxylate (3j).** Yellow oil. IR (KBr): 3325 (s), 2869 (m), 1718 (s), 1560 (s), 1557 (s), 1456 (m), 1355 (s), 788 (s)  $cm^{-1}$ .  $^1H$  NMR (600 MHz,  $CDCl_3$ )  $\delta$  8.95 (s, 1H), 7.89-7.88 (d,  $J = 7.8$  Hz, 1H), 7.81-7.80 (d,  $J = 7.8$  Hz, 1H), 7.68-7.67 (d,  $J = 4.2$  Hz, 2H), 7.55 (s, 1H), 7.48-7.45 (m, 4H), 4.16-4.13 (q,  $J = 7.2$  Hz, 2H), 2.60 (s, 3H), 1.03 (t,  $J = 7.1$  Hz, 3H);  $^{13}C$  NMR (150 MHz,  $CDCl_3$ )  $\delta$  168.17, 167.52, 165.72, 158.19, 148.79, 140.39, 138.05, 130.11, 129.49, 128.51, 128.13, 124.30, 117.11, 113.77, 113.18, 61.55, 22.93, 13.58. HRMS (ESI)  $m/z$  calcd for  $C_{20}H_{19}N_4O_4$   $[M + H]^+$  379.1401, found 379.1403.

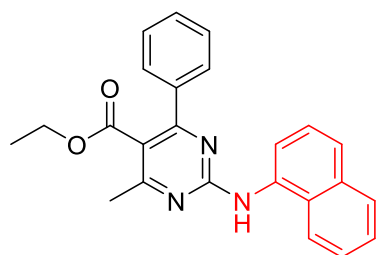

**Ethyl 4-methyl-2-(naphthalen-2-ylamino)-6-phenylpyrimidine-5-carboxylate (3k).**<sup>2</sup> Brown oil. IR (KBr): 3316 (s), 2975 (m), 1716 (s), 1554 (s), 1382 (s), 1048 (m), 885 (s)  $cm^{-1}$ .  $^1H$  NMR (400 MHz,  $CDCl_3$ )  $\delta$  8.18 (d,  $J = 7.6$  Hz, 1H), 8.01 (d,  $J = 4.4$  Hz, 1H), 7.86 (s, 1H), 7.79 (s, 1H), 7.65 (d,  $J = 8.0$  Hz, 1H), 7.58 (d,  $J = 5.2$  Hz, 2H), 7.49 (s, 3H), 7.40 (s, 3H), 4.10 (q,  $J = 7.2$  Hz, 2H), 2.53 (s, 3H), 0.99 (t,  $J = 7.0$  Hz, 3H);  $^{13}C$  NMR (100 MHz,  $CDCl_3$ )  $\delta$  168.49, 167.35, 165.88, 159.80, 138.58, 134.19, 133.80, 129.56, 128.58, 128.21, 128.03, 127.22, 125.89, 125.79, 125.67, 124.43, 121.05, 119.17, 117.22, 61.20, 22.88, 13.53. HRMS (ESI)  $m/z$  calcd for  $C_{24}H_{21}N_3O_2$   $[M + H]^+$  384.1707, found 384.1710.

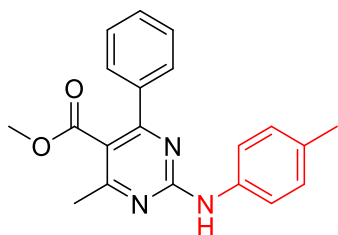

**Methyl 4-methyl-6-phenyl-2-(p-tolylamino)pyrimidine-5-carboxylate (3l).** Yellow oil. IR (KBr): 3323 (s), 2980 (m), 1715 (s), 1552 (s), 1380 (s), 1165 (m), 1045 (s), 580 (m)  $\text{cm}^{-1}$ .  $^1\text{H}$  NMR (600 MHz,  $\text{CDCl}_3$ )  $\delta$  7.62-7.61 (m, 2H), 7.56 (d,  $J = 7.8$  Hz, 2H), 7.47-7.42 (m, 3H), 7.25 (s, 1H), 7.14 (d,  $J = 7.8$  Hz, 2H), 3.62 (s, 3H), 2.54 (s, 3H), 2.32 (s, 3H);  $^{13}\text{C}$  NMR (150 MHz,  $\text{CDCl}_3$ )  $\delta$  169.13, 167.29, 165.69, 158.88, 138.59, 136.46, 132.44, 129.77, 129.41, 128.39, 127.97, 119.48, 52.10, 22.99, 20.78. HRMS (ESI)  $m/z$  calcd for  $\text{C}_{20}\text{H}_{20}\text{N}_3\text{O}_2$  [ $\text{M} + \text{H}$ ] $^+$  334.1550, found 334.1553.

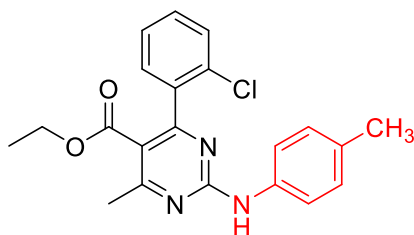

**Ethyl 4-(2-chlorophenyl)-6-methyl-2-(p-tolylamino)pyrimidine-5-carboxylate (3m).** Yellow oil. IR (KBr): 3323 (s), 2973 (m), 1715 (s), 1655 (s), 1450 (s), 1250 (m), 850 (s)  $\text{cm}^{-1}$ .  $^1\text{H}$  NMR (600 MHz,  $\text{CDCl}_3$ )  $\delta$  7.54 (d,  $J = 7.2$  Hz, 2H), 7.43 (d,  $J = 7.8$  Hz, 1H), 7.34-7.32 (m, 4H), 7.13 (d,  $J = 8.4$  Hz, 2H), 4.01 (q,  $J = 7.2$  Hz, 2H), 2.66 (s, 3H), 2.32 (s, 3H), 0.88 (t,  $J = 7.2$  Hz, 3H);  $^{13}\text{C}$  NMR (150 MHz,  $\text{CDCl}_3$ )  $\delta$  169.04, 166.61, 165.85, 158.66, 138.71, 136.18, 132.69, 131.89, 129.69, 129.56, 129.42, 129.37, 128.04, 126.57, 119.57, 119.47, 116.93, 77.22, 77.00, 76.79, 60.86, 24.08, 20.79, 13.38, 1.01, -0.02. HRMS (ESI)  $m/z$  calcd for  $\text{C}_{21}\text{H}_{21}\text{ClN}_3\text{O}_2$  [ $\text{M} + \text{H}$ ] $^+$  382.1317, found 382.1315.

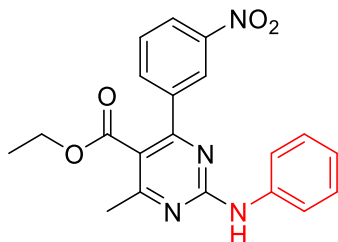

**Ethyl 4-methyl-6-(3-nitrophenyl)-2-(phenylamino)pyrimidine-5-carboxylate (3n).**<sup>2</sup> Light yellow oil IR (KBr): 3120 (s), 2868 (m), 1714 (s), 1565 (s), 1552 (s), 1456 (s), 1360 (s), 780 (s)  $\text{cm}^{-1}$ .  $^1\text{H}$  NMR (400 MHz,  $\text{CDCl}_3$ )  $\delta$  8.45 (s, 1H), 8.24 (d,  $J = 7.6$  Hz, 1H), 7.86 (d,  $J = 7.6$  Hz, 1H), 7.57 (m, 3H), 7.34 (s, 1H), 7.28 (t,  $J = 7.6$  Hz, 2H), 7.01 (t,  $J = 7.2$  Hz, 1H), 4.10 (q,  $J = 6.8$  Hz, 2H), 2.52 (s, 3H), 1.02 (t,  $J = 7.0$  Hz, 3H);  $^{13}\text{C}$  NMR (100 MHz,  $\text{CDCl}_3$ )  $\delta$  168.19, 167.68, 163.26, 158.82, 148.19, 140.25, 138.69, 134.06, 129.31, 128.97, 124.27, 123.37, 123.25, 119.50, 117.00, 61.59, 23.24, 13.72. HRMS (ESI)  $m/z$  calcd for  $\text{C}_{20}\text{H}_{18}\text{N}_4\text{O}_4$  [ $\text{M} + \text{H}$ ] $^+$  379.1401, found 379.1403.

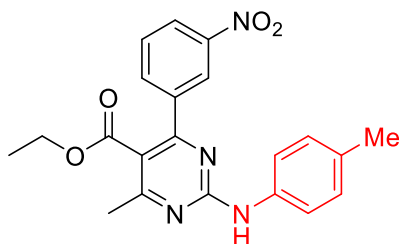

**Ethyl 4-methyl-6-(3-nitrophenyl)-2-(p-tolylamino)pyrimidine-5-carboxylate (3o).**<sup>2</sup> Yellow solid, m.p. = 126-128 °C. IR (KBr):3315 (s), 2970 (m), 1720 (s), 1565 (s), 1558 (s), 1459 (m), 1345 (s), 780 (s) cm<sup>-1</sup>. <sup>1</sup>H NMR (400 MHz, CDCl<sub>3</sub>) δ 8.41 (s, 1H), 8.19 (d, *J* = 7.2 Hz, 1H), 7.83 (d, *J* = 7.2 Hz, 1H), 7.51 (d, *J* = 8.0 Hz, 1H), 7.47 (d, *J* = 7.2 Hz, 1H), 7.41 (d, *J* = 8.0 Hz, 2H), 7.04 (d, *J* = 8.0 Hz, 2H), 4.08 (q, *J* = 7.2 Hz, 2H), 2.49 (s, 3H), 2.23 (s, 3H), 0.99 (t, *J* = 7.0 Hz, 3H); <sup>13</sup>C NMR (100 MHz, CDCl<sub>3</sub>) δ 168.12, 167.68, 163.22, 158.88, 148.07, 140.24, 135.97, 134.00, 132.85, 129.36, 129.18, 124.13, 123.30, 119.75, 116.53, 61.46, 23.19, 20.70, 13.65. HRMS (ESI) *m/z* calcd for C<sub>21</sub>H<sub>20</sub>N<sub>4</sub>O<sub>4</sub> [M + H]<sup>+</sup> 393.1557, found 393.1559.

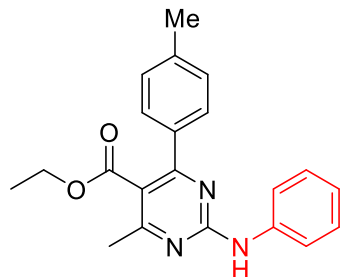

**Ethyl 4-methyl-2-(phenylamino)-6-(p-tolyl)pyrimidine-5-carboxylate (3p).**<sup>2</sup> Colourless oil. IR (KBr):3325 (s), 2973 (m), 1710 (s), 1652 (s), 1456 (s), 1253 (m), 880 (s) cm<sup>-1</sup>. <sup>1</sup>H NMR (400 MHz, CDCl<sub>3</sub>) δ 7.68 (d, *J* = 9.6 Hz, 1H), 7.63 (d, *J* = 8.0 Hz, 2H), 7.55-7.53 (m, 2H), 7.31-7.27 (m, 2H), 7.22 (d, *J* = 7.2 Hz, 2H), 7.02 (d, *J* = 6.8 Hz, 1H), 4.17-4.11 (m, 2H), 2.54 (s, 3H), 2.37 (s, 3H), 1.04 (t, *J* = 7.0 Hz, 3H); <sup>13</sup>C NMR (100 MHz, CDCl<sub>3</sub>) δ 168.66, 166.89, 165.53, 158.73, 139.86, 139.14, 135.61, 128.96, 128.72, 128.01, 122.52, 119.16, 116.94, 61.21, 22.85, 21.28, 13.58. HRMS (ESI) *m/z* calcd for C<sub>21</sub>H<sub>21</sub>N<sub>3</sub>O<sub>2</sub> [M + H]<sup>+</sup> 348.1707, found 348.1710.

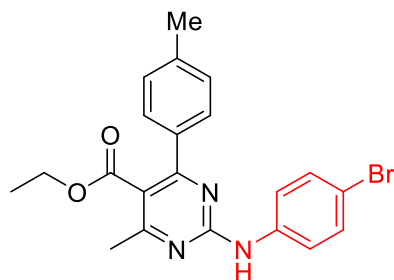

**Ethyl 2-(4-bromophenylamino)-4-methyl-6-p-tolylpyrimidine-5-carboxylate (3q).**<sup>2</sup> White solid, m.p. = 115-117 °C. IR (KBr):3335 (s), 2960 (m), 1716 (s), 1558 (s), 1368 (m), 1255 (s), 746 (m), 695 (m) cm<sup>-1</sup>. <sup>1</sup>H NMR (400 MHz, CDCl<sub>3</sub>) δ 7.80 (s, 1H), 7.49 (t, *J* = 9.8 Hz, 4H), 7.36 (d, *J* = 8.8 Hz, 2H), 7.21 (d, *J* = 6.8 Hz, 2H), 4.15 (q, *J* = 7.2 Hz, 2H), 2.53 (s, 3H), 2.38 (s, 3H), 1.05 (t, *J* = 7.0 Hz, 3H); <sup>13</sup>C NMR (100 MHz, CDCl<sub>3</sub>) δ 168.52, 166.98, 165.52, 158.50, 140.08, 138.26, 135.38, 131.57, 129.03, 127.99, 120.75, 117.32, 114.82, 61.33, 22.85, 21.31, 13.61. HRMS (ESI) *m/z* calcd for C<sub>21</sub>H<sub>20</sub>BrN<sub>3</sub>O<sub>2</sub> [M + H]<sup>+</sup> 426.0812, found 426.0815.

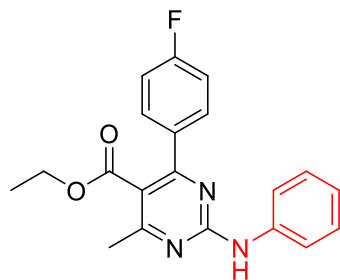

**Ethyl 4-(4-fluorophenyl)-6-methyl-2-(phenylamino)pyrimidine-5-carboxylate (3r).**<sup>2</sup> White solid, m.p. = 127-129 °C. IR (KBr):3320 (s), 2985 (m), 1718 (s), 1556 (s), 1385 (s), 1153 (m), 850 (s), 620 (m) cm<sup>-1</sup>. <sup>1</sup>H NMR (400 MHz, CDCl<sub>3</sub>) δ 7.54 (d, *J* = 7.2 Hz, 5H), 7.22 (t, *J* = 7.6 Hz, 2H), 7.02 (t, *J* = 8.4 Hz, 2H), 6.95 (t, *J* = 7.2 Hz, 1H), 4.05



(q,  $J = 7.2$  Hz, 2H), 2.46 (s, 3H), 0.96 (t,  $J = 7.0$  Hz, 3H);  $^{13}\text{C}$  NMR (100 MHz,  $\text{CDCl}_3$ ):  $\delta$  168.34, 167.30, 164.70, 162.43, 158.72, 138.98, 134.64, 130.10, 128.79, 122.78, 119.29, 116.93, 115.32, 61.30, 22.90, 13.61. HRMS (ESI)  $m/z$  calcd for  $\text{C}_{20}\text{H}_{18}\text{FN}_3\text{O}_2$   $[\text{M} + \text{H}]^+$  352.1456, found 352.1459.

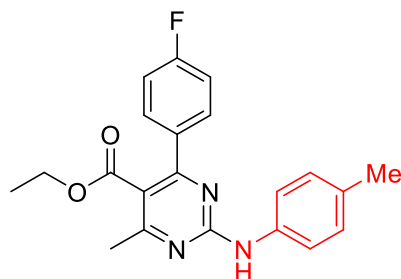

**Ethyl 4-(4-fluorophenyl)-6-methyl-2-(p-tolylamino)pyrimidine-5-carboxylate (3s).**<sup>2</sup> Brown oil. IR (KBr): 3320 (s), 2875 (m), 1715 (s), 1558 (s), 1457 (s), 1150 (m), 859 (s), 633 (m)  $\text{cm}^{-1}$ .  $^1\text{H}$  NMR (400 MHz,  $\text{CDCl}_3$ )  $\delta$  7.53 (t,  $J = 6.8$  Hz, 2H), 7.43 (d,  $J = 8.4$  Hz, 2H), 7.38 (s, 1H), 7.03 (t,  $J = 8.2$  Hz, 4H), 4.05 (q,  $J = 7.2$  Hz, 2H), 2.45 (s, 3H), 2.23 (s, 3H), 0.97 (t,  $J = 7.0$  Hz, 3H);  $^{13}\text{C}$  NMR (100 MHz,  $\text{CDCl}_3$ )  $\delta$  168.42, 167.30, 164.72, 162.43, 158.82, 136.37, 134.77, 132.45, 130.10, 129.32, 119.56, 116.69, 115.30, 61.25, 22.93, 20.71, 13.63. HRMS (ESI)  $m/z$  calcd for  $\text{C}_{21}\text{H}_{21}\text{FN}_3\text{O}_2$   $[\text{M} + \text{H}]^+$  366.1612, found 366.1614.

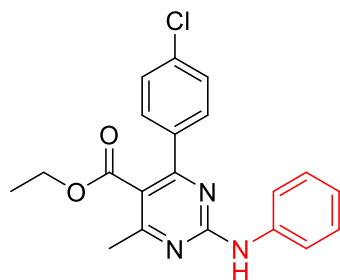

**Ethyl 4-(4-chlorophenyl)-6-methyl-2-(phenylamino)pyrimidine-5-carboxylate (3t).**<sup>2</sup> White solid, m.p. = 129-131  $^\circ\text{C}$ . IR (KBr): 3210 (s), 2976 (m), 1714 (s), 1545 (m), 1376 (s), 1243 (s), 750 (m), 520 (m)  $\text{cm}^{-1}$ .  $^1\text{H}$  NMR (400 MHz,  $\text{CDCl}_3$ )  $\delta$  7.59 (d,  $J = 7.6$  Hz, 2H), 7.49 (d,  $J = 8.0$  Hz, 2H), 7.35-7.32 (m, 3H), 7.26 (t,  $J = 7.6$  Hz, 2H), 6.98 (t,  $J = 7.2$  Hz, 1H), 4.07 (q,  $J = 6.8$  Hz, 2H), 2.48 (s, 3H), 0.99 (t,  $J = 7.2$  Hz, 3H);  $^{13}\text{C}$  NMR (100 MHz,  $\text{CDCl}_3$ ):  $\delta$  168.24, 167.48, 164.51, 158.74, 138.98, 137.08, 135.94, 129.49, 128.90, 128.57, 122.91, 119.30, 117.03, 61.41, 22.99, 13.68. HRMS (ESI)  $m/z$  calcd for  $\text{C}_{20}\text{H}_{18}\text{ClN}_3\text{O}_2$   $[\text{M} + \text{H}]^+$  368.1160, found 368.1158.

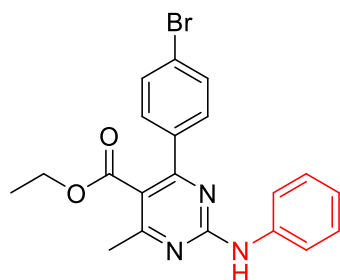

**Ethyl 4-(4-bromophenyl)-6-methyl-2-(phenylamino)pyrimidine-5-carboxylate (3u).**<sup>2</sup> White solid, m.p. = 123-125  $^\circ\text{C}$ . IR (KBr): 3230 (s), 2965 (m), 1720 (s), 1550 (m), 1368 (m), 1250 (s), 740 (m), 690 (m)  $\text{cm}^{-1}$ .  $^1\text{H}$  NMR (400 MHz,  $\text{CDCl}_3$ )  $\delta$  7.67 (s, 1H), 7.50 (d,  $J = 7.6$  Hz, 2H), 7.44 (d,  $J = 8.4$  Hz, 2H), 7.38 (d,  $J = 8.4$  Hz, 2H), 7.19 (t,  $J = 7.6$  Hz, 2H), 6.93 (t,  $J = 6.8$  Hz, 1H), 4.03 (q,  $J = 7.2$  Hz, 2H), 2.44 (s, 3H), 0.95 (t,  $J = 7.0$  Hz, 3H);  $^{13}\text{C}$  NMR (100 MHz,  $\text{CDCl}_3$ )  $\delta$  168.13, 167.43, 164.49, 158.74, 138.90, 137.45, 131.41, 129.67, 128.75, 124.16,

122.81, 119.32, 116.80, 61.32, 22.92, 13.59. HRMS (ESI)  $m/z$  calcd for  $C_{20}H_{18}BrN_3O_2$   $[M + H]^+$  412.0655, found 412.0657.

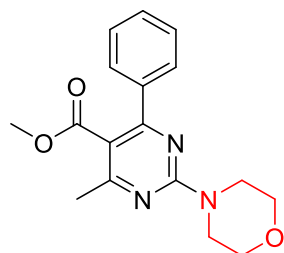

**Methyl 4-methyl-2-morpholino-6-phenylpyrimidine-5-carboxylate (5a).**<sup>3</sup> Colorless oil. IR (KBr): 2952 (w), 1718 (vs), 1638 (s), 1560 (s), 1490 (s), 1458 (s), 1068 (s), 1024 (m), 766 (vw)  $cm^{-1}$ .  $^1H$  NMR (400 MHz,  $CDCl_3$ )  $\delta$  7.59–7.58 (m, 2H), 7.41 (d,  $J = 4.8$  Hz, 3H), 3.93–3.91 (m, 4H), 3.76–3.74 (m, 4), 3.58 (s, 3H), 2.49 (s, 3H);  $^{13}C$  NMR (150 MHz,  $CDCl_3$ )  $\delta$  169.51, 167.05, 165.41, 160.29, 139.17, 129.54, 128.19, 128.00, 114.19, 66.84, 51.86, 44.13, 23.16. HRMS (ESI)  $m/z$  calcd for  $C_{17}H_{19}N_3O_3$   $[M + H]^+$  314.1499, found 314.1497.

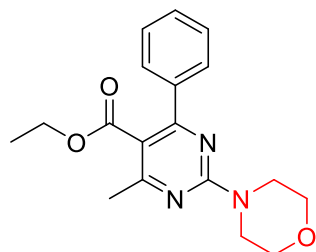

**Ethyl 4-methyl-2-morpholino-6-phenylpyrimidine-5-carboxylate (5b).**<sup>3</sup> White solid, m.p. = 118–119 °C. IR (KBr): 2964 (w), 1718 (vs), 1560 (s), 1512 (s), 1492 (s), 1444 (s), 1232 (s), 690 (vw), 576 (vw)  $cm^{-1}$ .  $^1H$  NMR (400 MHz,  $CDCl_3$ )  $\delta$  7.58–7.40 (m, 5 H), 4.08–4.03 (m, 2 H), 3.94–3.92 (m, 4 H), 3.76 (t,  $J = 4.80$  Hz, 4 H), 2.50 (s, 3 H), 0.95 (t,  $J = 7.60$  Hz, 3 H);  $^{13}C$  NMR (100 MHz,  $CDCl_3$ )  $\delta$  168.96, 167.03, 165.66, 160.20, 139.30, 129.46, 128.16, 128.06, 114.48, 66.87, 60.99, 44.10, 23.14, 13.54. HRMS (ESI)  $m/z$  calcd for  $C_{18}H_{21}N_3O_3$   $[M + H]^+$  328.1656, found 326.1658.

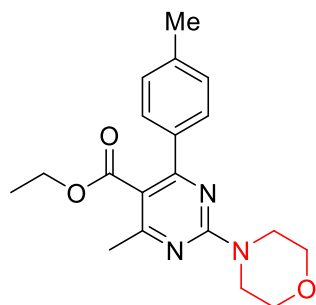

**Ethyl 4-Methyl-2-morpholino-6-(p-tolyl)pyrimidine-5-carboxylate (5c).**<sup>3</sup> White solid, mp 68–70 °C. IR (KBr): 2964 (s), 1716 (vs), 1584 (s), 1560 (vs), 1510 (s), 1448 (m), 1234 (s), 1016 (s), 796 (s), 594 (m)  $cm^{-1}$ .  $^1H$  NMR (400 MHz,  $CDCl_3$ )  $\delta$  7.49 (d,  $J = 8.00$  Hz, 2H), 7.22 (d,  $J = 8.00$  Hz, 2H), 4.12–4.07 (m, 2H), 3.92 (t,  $J = 4.40$  Hz, 4H), 3.75 (t,  $J = 4.40$  Hz, 4H), 2.48 (s, 3H), 2.38 (s, 3H), 1.01 (t,  $J = 6.80$  Hz, 3H);  $^{13}C$  NMR (100 MHz,  $CDCl_3$ )  $\delta$  169.16, 166.74, 165.43, 160.22, 139.64, 136.36, 128.86, 128.03, 114.45, 66.86, 60.98, 44.12, 23.04, 21.29, 13.61. HRMS (ESI)  $m/z$  calcd for  $C_{19}H_{23}N_3O_3$   $[M + H]^+$  342.1812, found 342.1815.

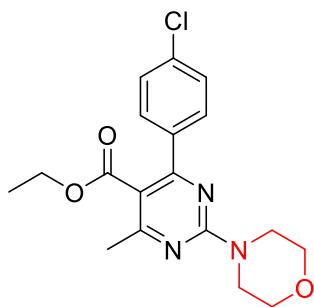

**Ethyl 4-(4-Chlorophenyl)-6-methyl-2-morpholinopyrimidine-5-carboxylate (5d).**<sup>3</sup> White solid, mp 80–83 °C. IR (KBr): 2950 (w), 1715 (vs), 1605 (s), 1580 (s), 1490 (s), 1454 (s), 1050 (s), 1025 (m), 830 (s), 650 (s), 540 (s) cm<sup>-1</sup>. <sup>1</sup>H NMR (400 MHz, CDCl<sub>3</sub>) δ 7.52–7.37 (m, 4H), 4.12–4.07 (m, 2H), 3.92 (t, J = 5.6 Hz, 4H), 3.76 (t, J = 5.20 Hz, 4H), 2.50 (s, 3H), 1.02 (t, J = 7.60 Hz, 3 H); <sup>13</sup>C NMR (100 MHz, CDCl<sub>3</sub>) δ 168.68, 167.23, 164.45, 160.04, 137.70, 135.65, 129.47, 128.40, 114.27, 66.82, 61.14, 44.10, 23.17, 13.65. HRMS (ESI) m/z calcd for C<sub>18</sub>H<sub>20</sub>ClN<sub>3</sub>O<sub>3</sub> [M + H]<sup>+</sup> 362.1266, found 362.1268.

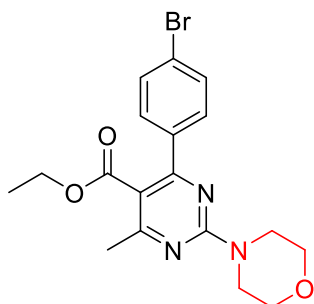

**Ethyl 4-(4-Bromophenyl)-6-methyl-2-morpholinopyrimidine-5-carboxylate (5e).**<sup>3</sup> white solid, mp 92–93 °C. IR (KBr): 2950 (w), 1718 (vs), 1596 (s), 1575 (s), 1482 (s), 1456 (s), 1034 (m), 650 (s), 585 (s) cm<sup>-1</sup>. <sup>1</sup>H NMR (400 MHz, CDCl<sub>3</sub>) δ 7.55–7.43 (m, 4H), 4.12–4.06 (m, 2H), 3.91 (t, J = 4.4 Hz, 4H), 3.75 (t, J = 4.8 Hz, 4H), 2.49 (s, 3H), 1.02 (t, J = 6.8 Hz, 3H); <sup>13</sup>C NMR (100 MHz, CDCl<sub>3</sub>) δ 168.65, 167.30, 164.53, 160.11, 138.25, 131.35, 129.75, 123.95, 114.28, 66.83, 61.12, 44.15, 23.17, 13.66. HRMS (ESI) m/z calcd for C<sub>18</sub>H<sub>20</sub>BrN<sub>3</sub>O<sub>3</sub> [M + H]<sup>+</sup> 406.0761, found 406.0759.

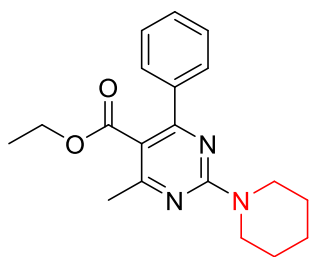

**Ethyl 4-Methyl-6-phenyl-2-(piperidin-1-yl)pyrimidine-5-carboxylate (5f).**<sup>3</sup> White solid, mp 69–70 °C. IR (KBr): 2950 (w), 1715 (vs), 1565 (s), 1550 (s), 1495 (s), 1450 (s), 1270 (s), 1164 (m) cm<sup>-1</sup>. <sup>1</sup>H NMR (400 MHz, CDCl<sub>3</sub>) δ 7.58–7.56 (m, 2H), 7.42–7.38 (m, 3H), 4.06–4.01 (m, 2H), 3.89 (t, J = 5.60 Hz, 4H), 2.49 (s, 3H), 1.68–1.60 (m, 6H), 0.93 (t, J = 7.2 Hz, 3H); <sup>13</sup>C NMR (100 MHz, CDCl<sub>3</sub>) δ 169.20, 166.91, 165.73, 160.15, 139.75, 129.20, 128.06, 113.18, 60.77, 44.64, 25.84, 24.83, 23.20, 13.51. HRMS (ESI) m/z calcd for C<sub>19</sub>H<sub>23</sub>N<sub>3</sub>O<sub>2</sub> [M + H]<sup>+</sup> 326.1863, found 326.1865.

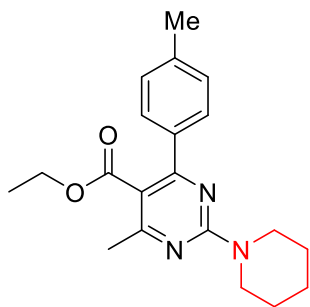

**Ethyl 4-Methyl-2-(piperidin-1-yl)-6-(p-tolyl)pyrimidine-5-carboxylate (5g).**<sup>3</sup> White solid, mp 68–69 °C. IR (KBr): 2925 (w), 1718 (vs), 1598 (s), 1568 (s), 1540 (s), 1230 (s), 1063 (s)  $\text{cm}^{-1}$ .  $^1\text{H}$  NMR (400 MHz,  $\text{CDCl}_3$ )  $\delta$  7.47 (d,  $J = 8.0$  Hz, 2H), 7.19 (d,  $J = 8.0$  Hz, 2H), 4.10–4.04 (m, 2H), 3.88 (t,  $J = 5.2$  Hz, 4H), 2.47 (s, 3H), 2.38 (s, 3H), 1.67–1.59 (m, 6H), 0.99 (t,  $J = 7.2$  Hz, 3H);  $^{13}\text{C}$  NMR (100 MHz,  $\text{CDCl}_3$ )  $\delta = 169.42, 166.61, 165.52, 139.35, 136.83, 128.77, 128.08, 60.79, 44.67, 25.85, 24.87, 23.19, 21.32, 13.63$ . HRMS (ESI)  $m/z$  calcd for  $\text{C}_{20}\text{H}_{25}\text{N}_3\text{O}_2$   $[\text{M} + \text{H}]^+$  340.2020, found 340.2023.

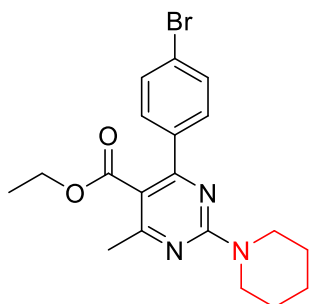

**Ethyl 4-(4-Bromophenyl)-6-methyl-2-(piperidin-1-yl)pyrimidine-5-carboxylate (5h).**<sup>3</sup> White solid, mp 61–62 °C. IR (KBr): 2928 (w), 1714 (vs), 1578 (s), 1558 (s), 1510 (s), 1458 (s), 1064 (s), 645 (m), 573 (s)  $\text{cm}^{-1}$ .  $^1\text{H}$  NMR (400 MHz,  $\text{CDCl}_3$ )  $\delta$  7.52 (d,  $J = 8.4$  Hz, 2 H), 7.43 (d,  $J = 8.0$  Hz, 2 H), 4.09–4.04 (m, 2 H), 3.88 (t,  $J = 5.2$  Hz, 4 H), 2.49 (s, 3 H), 1.68–1.60 (m, 6 H), 1.00 (t,  $J = 7.2$  Hz, 3 H);  $^{13}\text{C}$  NMR (100 MHz,  $\text{CDCl}_3$ )  $\delta$  168.89, 167.21, 164.59, 160.04, 138.70, 131.21, 129.76, 123.67, 60.89, 44.67, 25.85, 24.82, 23.29, 13.66. HRMS (ESI)  $m/z$  calcd for  $\text{C}_{19}\text{H}_{22}\text{N}_3\text{O}_2$   $[\text{M} + \text{H}]^+$  404.0968, found 404.0966.

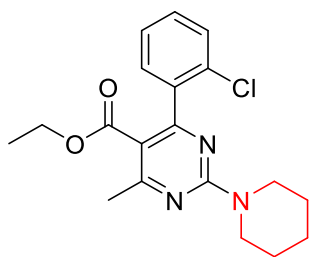

**Ethyl 4-(2-Chlorophenyl)-6-methyl-2-(piperidin-1-yl)pyrimidine-5-carboxylate (5i).**<sup>3</sup> colorless oil. IR (KBr): 2932 (s), 1716 (vs), 1560 (s), 1542 (s), 1510 (s), 1458 (s), 1092 (s), 1066 (s), 806 (s), 760 (s), 574 (s)  $\text{cm}^{-1}$ .  $^1\text{H}$  NMR (600 MHz,  $\text{CDCl}_3$ ):  $\delta$  7.38–7.37 (m, 1H), 7.28 (d,  $J = 2.4$  Hz, 3H), 3.94 (q,  $J = 4.8$  Hz, 2H), 3.85 (t,  $J = 3.6$  Hz, 4H), 2.58 (s, 3H), 1.68–1.56 (m, 6H), 0.83 (t,  $J = 4.8$  Hz, 3H);  $^{13}\text{C}$  NMR (150 MHz,  $\text{CDCl}_3$ )  $\delta$  168.54, 167.20, 165.69, 159.97, 139.89, 131.94, 129.72, 129.17, 129.15, 126.34, 113.07, 60.34, 44.70, 25.82, 24.80, 24.40, 13.38. HRMS (ESI)  $m/z$  calcd for  $\text{C}_{19}\text{H}_{22}\text{ClN}_3\text{O}_2$   $[\text{M} + \text{H}]^+$  360.1473, found 360.1475.

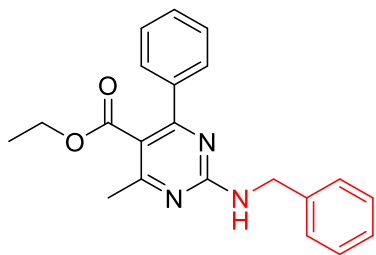

**Ethyl 2-(Benzylamino)-4-methyl-6-phenylpyrimidine-5-carboxylate (5j).**<sup>3</sup> Colorless oil. IR (KBr): 3252 (vs), 1716 (vs), 1598 (s), 1560 (s), 1532 (s), 1448 (s), 1256 (vs), 1166 (w), 1080 (vs), 1026 (s), 770 (s)  $\text{cm}^{-1}$ .  $^1\text{H}$  NMR (600 MHz,  $\text{CDCl}_3$ )  $\delta$  7.54 (d,  $J = 4.4$  Hz, 2H), 7.41–7.39 (m, 3H), 7.32–7.30 (m, 4H), 7.26–7.25 (m, 1H), 6.12 (s, 1H), 4.66 (d,  $J = 4.0$  Hz, 2H), 4.06 (q,  $J = 4.8$  Hz, 2H), 2.48 (s, 3H), 0.95 (t,  $J = 4.4$  Hz, 3H);  $^{13}\text{C}$  NMR (150 MHz,  $\text{CDCl}_3$ )  $\delta$  168.80, 161.12, 139.10, 129.43, 128.49, 128.31, 128.19, 128.05, 128.00, 127.80, 127.52, 127.16, 115.51, 61.03, 45.25, 22.69, 13.55. HRMS (ESI)  $m/z$  calcd for  $\text{C}_{21}\text{H}_{21}\text{N}_3\text{O}_2$  [ $\text{M} + \text{H}$ ]<sup>+</sup> 348.1707, found 348.1710.

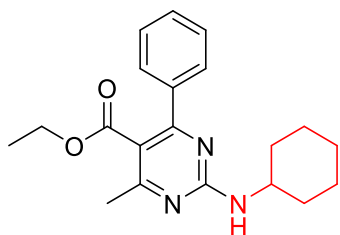

**Ethyl 2-(cyclohexylamino)-4-methyl-6-phenylpyrimidine-5-carboxylate (5k).** Brown oil. IR (KBr): 3372 (s), 2924 (m), 1718 (s), 1560 (s), 1448 (m), 1378 (s), 830 (s)  $\text{cm}^{-1}$ .  $^1\text{H}$  NMR (600 MHz,  $\text{CDCl}_3$ )  $\delta$  7.54 (s, 2H), 7.41 (s, 3H), 5.23 (s, 1H), 4.04 (q,  $J = 7.2$  Hz, 2H), 3.98–3.94 (m, 1H), 2.47 (s, 3H), 2.04 (d,  $J = 9.0$  Hz, 3H), 1.74 (d,  $J = 13.8$  Hz, 3H), 1.62 (d,  $J = 12.0$  Hz, 2H), 1.41 (q,  $J = 11.4$  Hz, 2H), 0.94 (t,  $J = 7.2$  Hz, 3H);  $^{13}\text{C}$  NMR (150 MHz,  $\text{CDCl}_3$ )  $\delta$  160.56, 139.35, 129.29, 128.16, 127.91, 60.91, 49.48, 33.05, 25.69, 24.70. HRMS (ESI)  $m/z$  calcd for  $\text{C}_{20}\text{H}_{25}\text{N}_3\text{O}_2$  [ $\text{M} + \text{H}$ ]<sup>+</sup> 330.2020, found 340.2023.

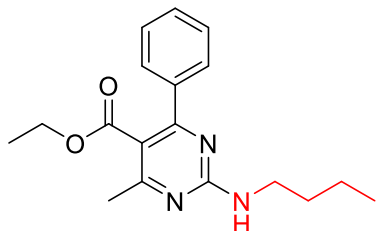

**Ethyl 2-(Butylamino)-4-methyl-6-phenylpyrimidine-5-carboxylate (5l).**<sup>3</sup> White solid, mp 76–78  $^{\circ}\text{C}$ . IR (KBr): 3242 (vs), 1715 (vs), 1598 (s), 1570 (s), 1512 (s), 1446 (s), 1250 (s), 1085 (vs), 1028 (s), 775 (s)  $\text{cm}^{-1}$ .  $^1\text{H}$  NMR (400 MHz,  $\text{CDCl}_3$ )  $\delta$  7.55 (s, 2H), 7.42 (s, 3H), 5.53 (s, 1H), 4.04 (q,  $J = 7.2$  Hz, 2H), 3.47 (q,  $J = 6.4$  Hz, 2H), 2.49 (s, 3H), 1.61–1.54 (m, 2H), 1.44–1.35 (m, 2H), 0.94 (t,  $J = 7.2$  Hz, 6H);  $^{13}\text{C}$  NMR (100 MHz,  $\text{CDCl}_3$ )  $\delta$  168.80, 166.11, 161.19, 139.28, 139.25, 129.27, 128.11, 127.90, 114.94, 60.88, 40.98, 31.68, 19.97, 13.78, 13.74, 13.49. HRMS (ESI)  $m/z$  calcd for  $\text{C}_{18}\text{H}_{23}\text{N}_3\text{O}_2$  [ $\text{M} + \text{H}$ ]<sup>+</sup> 314.1863, found 314.1865.

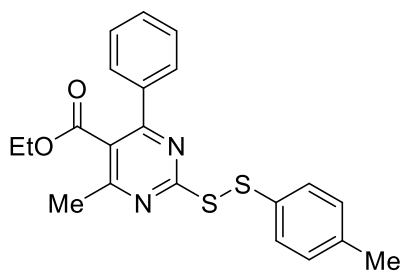

**Ethyl 4-methyl-6-phenyl-2-(p-tolyldisulfanyl)pyrimidine-5-carboxylate (6a).** Colorless oil. IR (KBr): 2964 (w), 1718 (s), 1560 (s), 1512 (s), 1492 (s), 1444 (s), 1260 (s), 1232 (s), 690 (w), 576 (w)  $\text{cm}^{-1}$ .  $^1\text{H}$  NMR (400 MHz,  $\text{CDCl}_3$ )  $\delta$  7.54 (d,  $J = 6.0$  Hz, 2H), 7.48 – 7.33 (m, 5H), 7.01 (d,  $J = 8.0$  Hz, 2H), 4.09 (q,  $J = 7.2$  Hz, 2H), 2.51 (s, 3H), 2.23 (s, 3H), 0.97 (t,  $J = 7.2$  Hz, 3H);  $^{13}\text{C}$  NMR (100 MHz,  $\text{CDCl}_3$ )  $\delta$  170.67, 167.85, 166.36, 164.19, 138.34, 137.23, 130.66, 130.37, 129.72, 128.50, 122.59, 61.93, 22.68, 21.17, 13.66. HRMS (ESI)  $m/z$  calcd for  $\text{C}_{21}\text{H}_{20}\text{N}_2\text{O}_2\text{S}_2$   $[\text{M} + \text{H}]^+$  397.1039, found 397.1041.

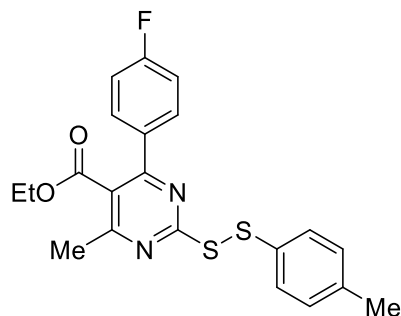

**Ethyl 4-(4-fluorophenyl)-6-methyl-2-(p-tolyldisulfanyl)pyrimidine-5-carboxylate (6b).** Colorless oil. IR (KBr): 2950 (w), 1710 (s), 1560 (s), 1480 (s), 1440 (s), 1300 (s), 1270 (s), 1220 (s), 730 (w), 680 (w), 570 (w)  $\text{cm}^{-1}$ .  $^1\text{H}$  NMR (400 MHz,  $\text{CDCl}_3$ )  $\delta$  7.57 (d,  $J = 8.8$  Hz, 2H), 7.46 (d,  $J = 8.0$  Hz, 2H), 7.09 – 6.95 (m, 4H), 4.14 (q,  $J = 7.2$  Hz, 2H), 2.52 (s, 3H), 2.25 (s, 3H), 1.05 (t,  $J = 7.2$  Hz, 3H);  $^{13}\text{C}$  NMR (100 MHz,  $\text{CDCl}_3$ )  $\delta$  170.72, 167.80, 166.44, 162.84, 138.35, 133.09, 132.10, 130.50, 129.73, 122.36, 115.78, 62.02, 22.66, 21.15, 13.74. HRMS (ESI)  $m/z$  calcd for  $\text{C}_{21}\text{H}_{19}\text{FN}_2\text{O}_2\text{S}_2$   $[\text{M} + \text{H}]^+$  415.0945, found 415.0948.

### 3. Reference

1. Z.-J. Quan, Y. Lv, F.-Q. Jing, X.-D. Jia, C.-D. Huo and X.-C. Wang, *Adv. Synth. Catal.*, 2014, **356**, 325.
2. Y. Zhang, Z.J. Quan, H.-P. Gong, Y. X. Da, Z. Zhang and X.C. Wang, *Tetrahedron*, 2015, **71**, 2113.
3. T. Xing, K.J. Wei Z.J. Quan and X.C. Wang, *Synthesis*, 2015, 2015, **47**, 3925.

#### 4. Copies of the NMR Spectra for All Products.

##### $^1\text{H}$ and $^{13}\text{C}$ Spectra of compound 3a (CDCl<sub>3</sub>, 400 MHz)

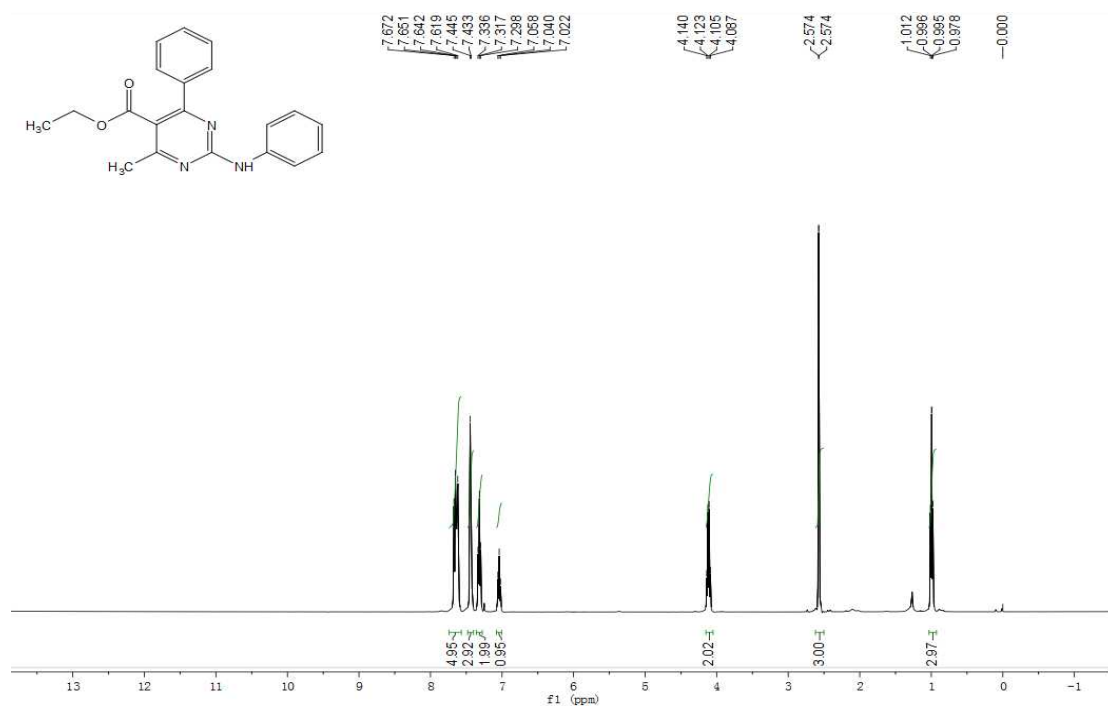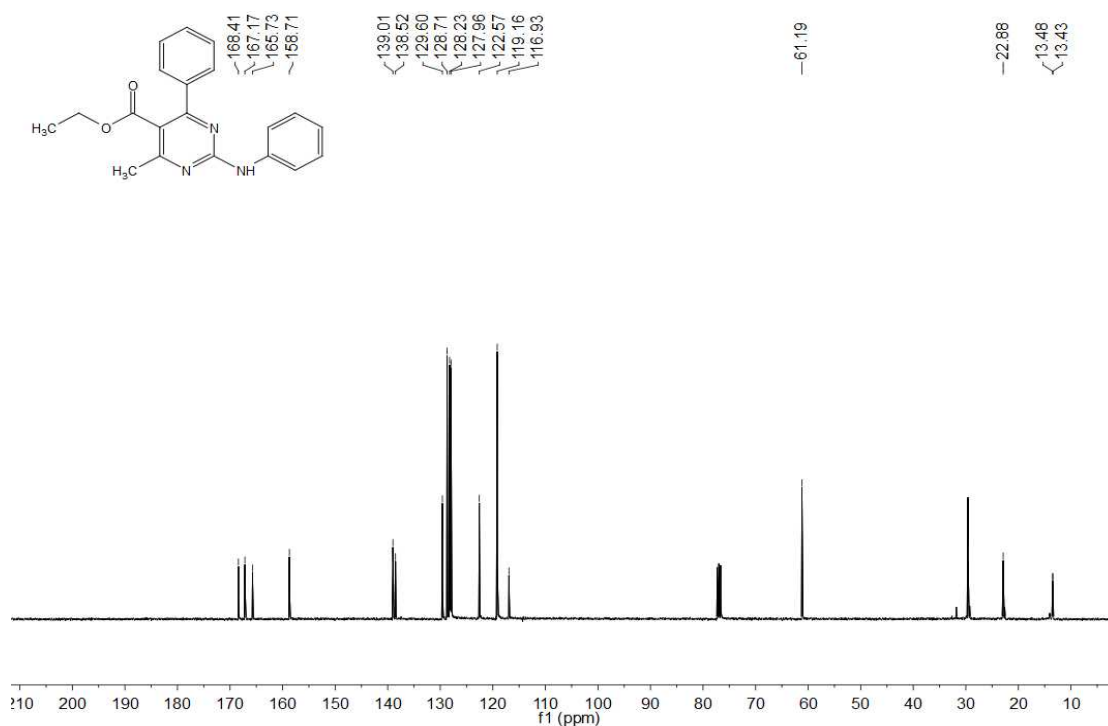



# <sup>1</sup>H and <sup>13</sup>C Spectra of compound 3b (CDCl<sub>3</sub>, 400 MHz)

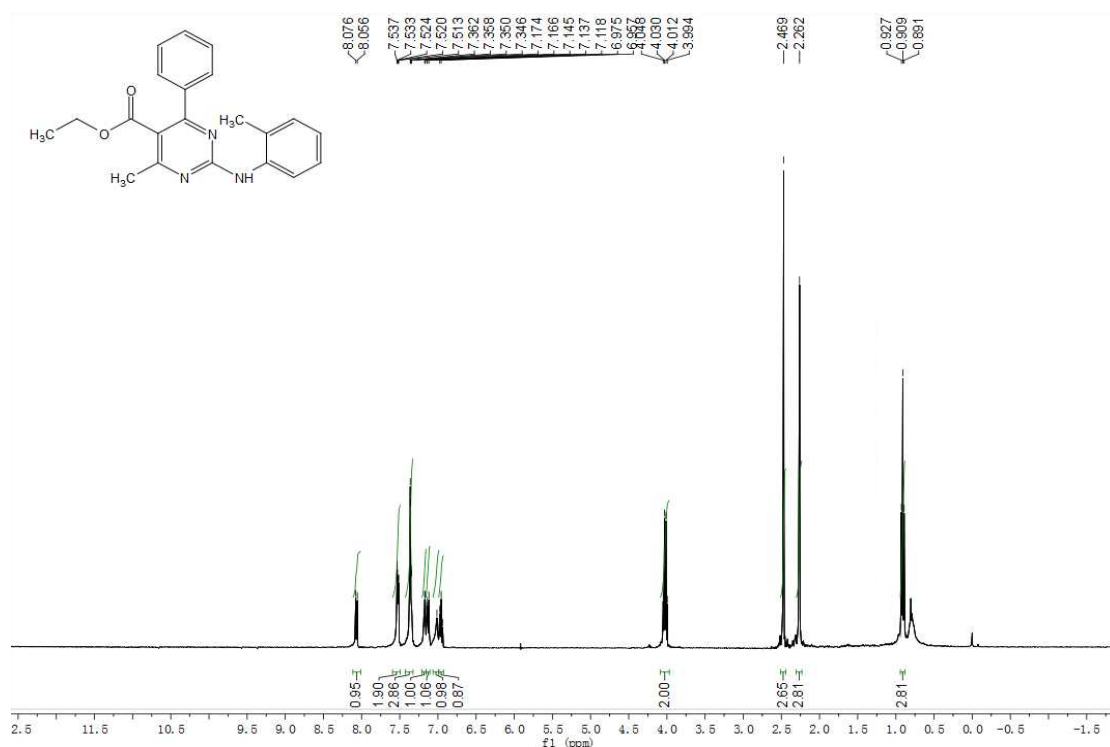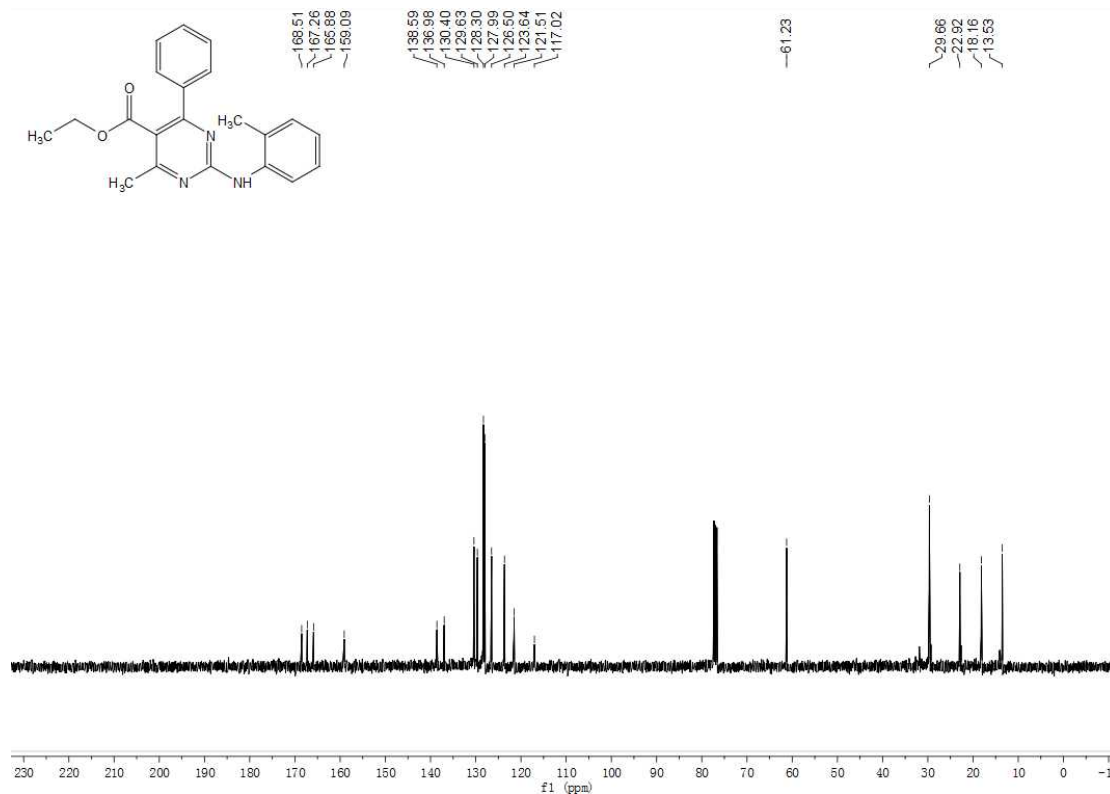

# <sup>1</sup>H and <sup>13</sup>C Spectra of compound 3c (CDCl<sub>3</sub>, 400 MHz)

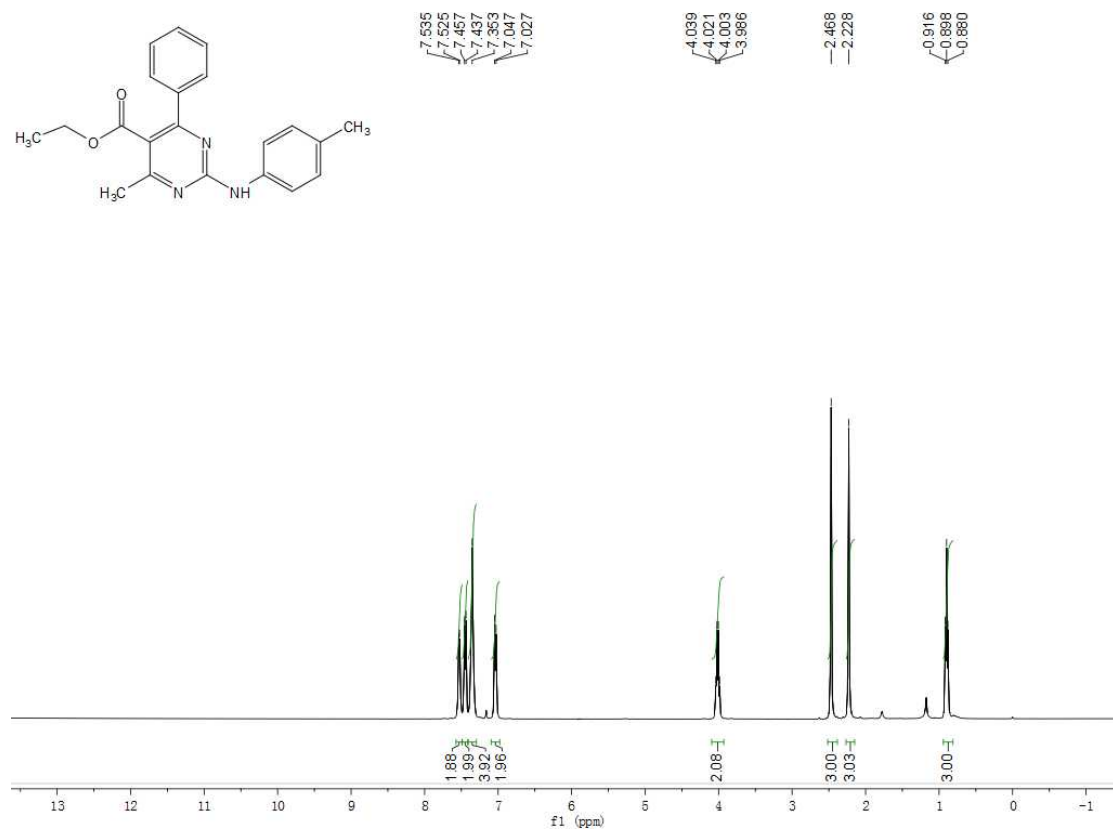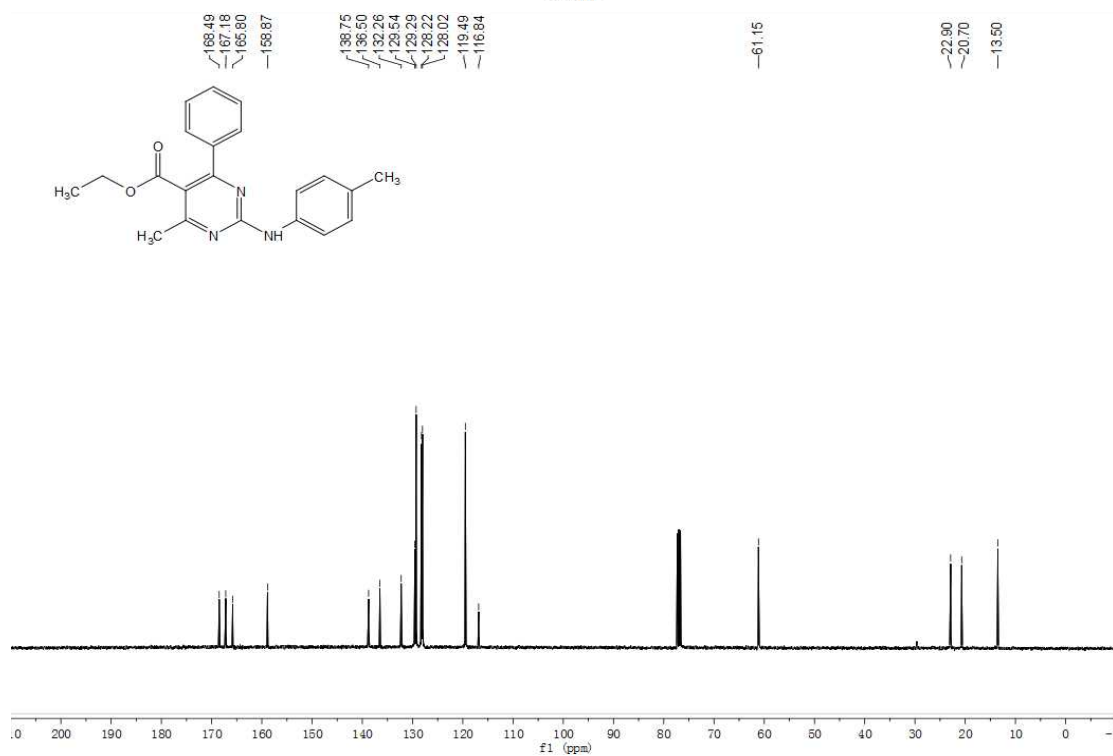

# $^1\text{H}$ and $^{13}\text{C}$ Spectra of compound 3d ( $\text{CDCl}_3$ , 400 MHz)

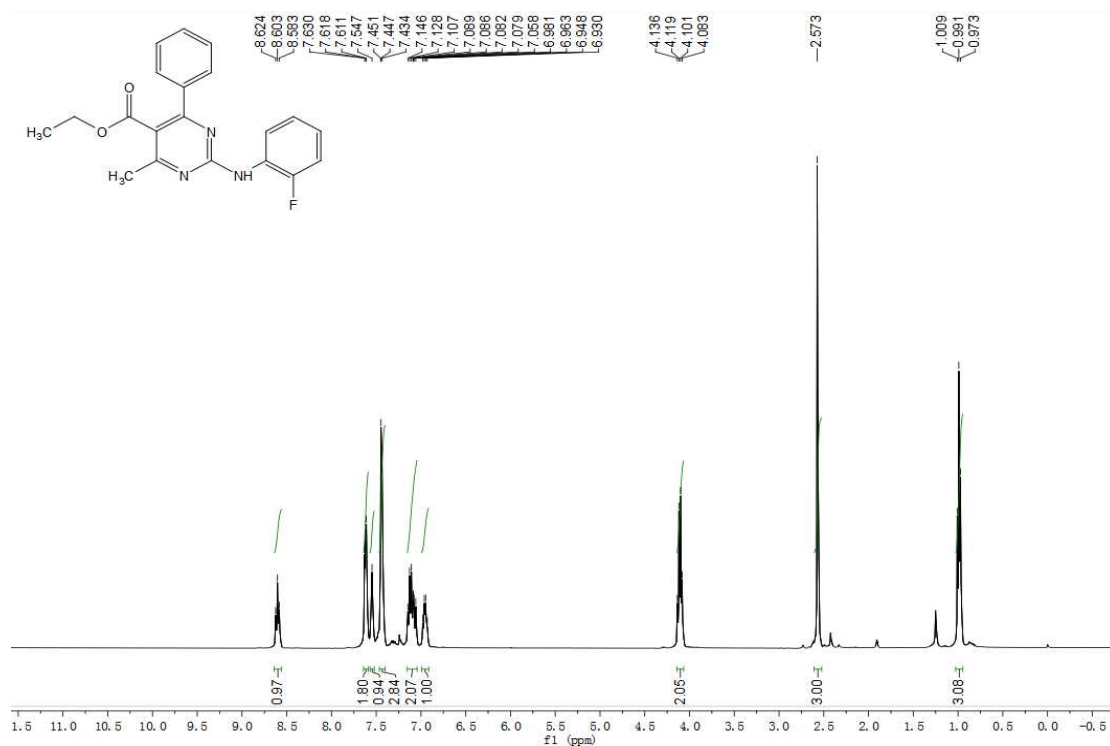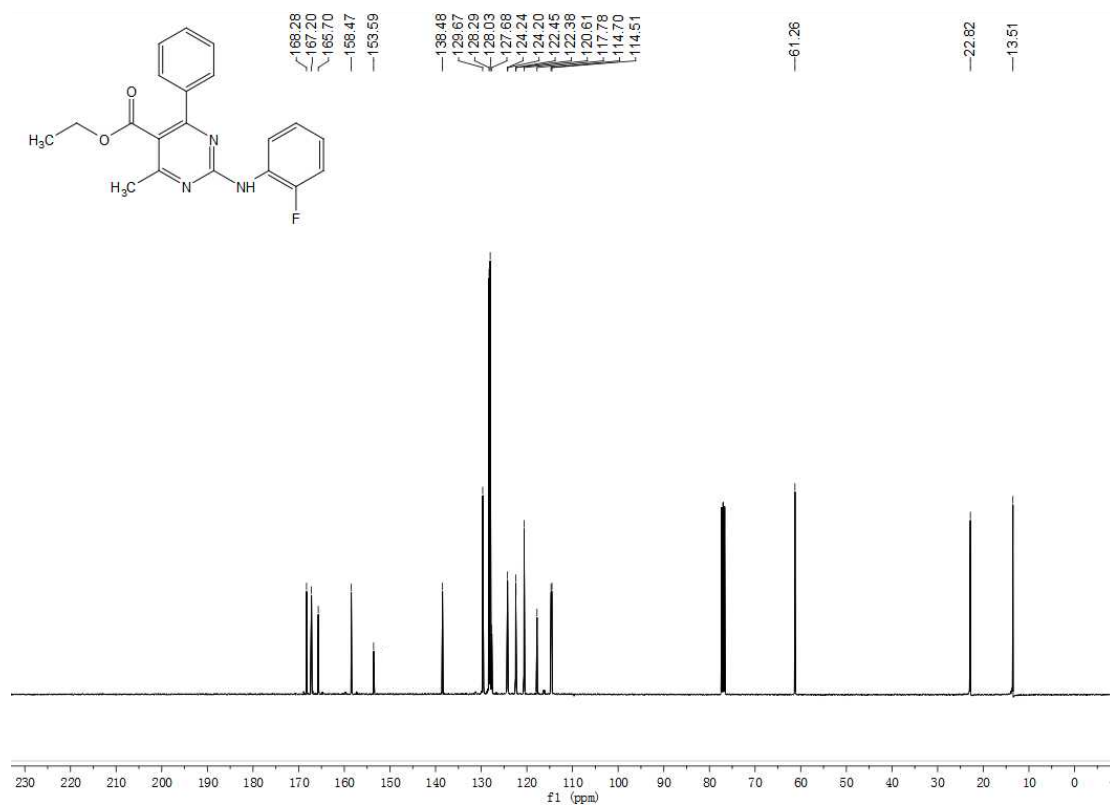

# $^1\text{H}$ and $^{13}\text{C}$ Spectra of compound 3e ( $\text{CDCl}_3$ , 400 MHz)

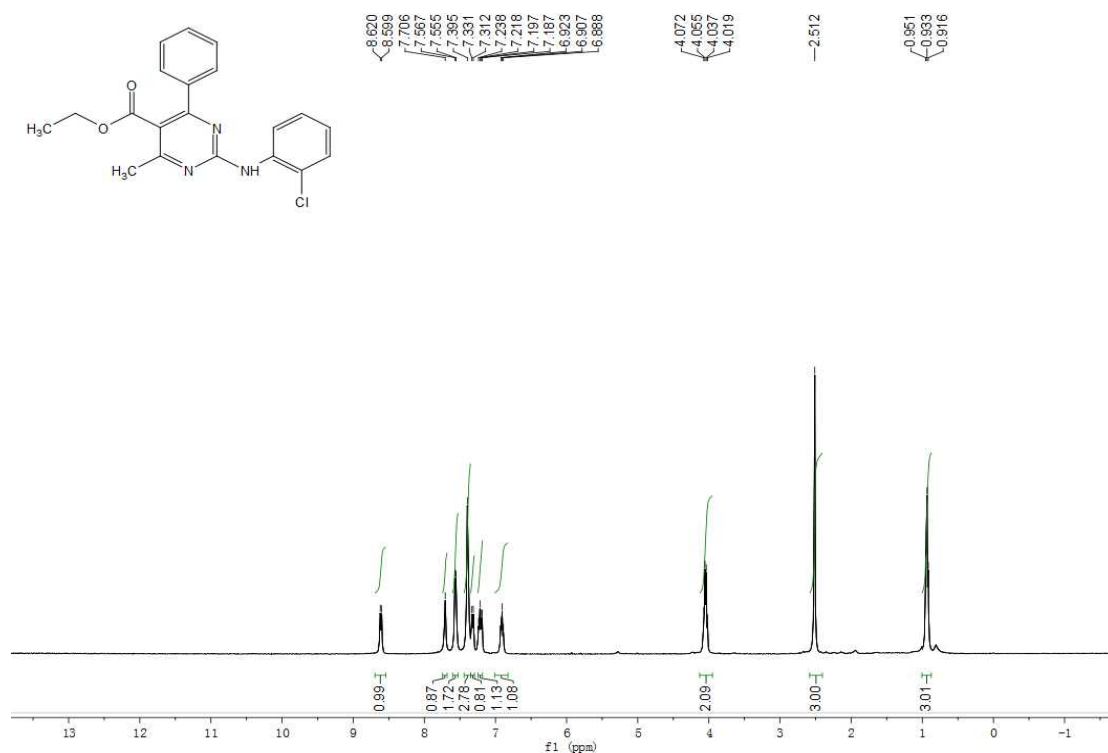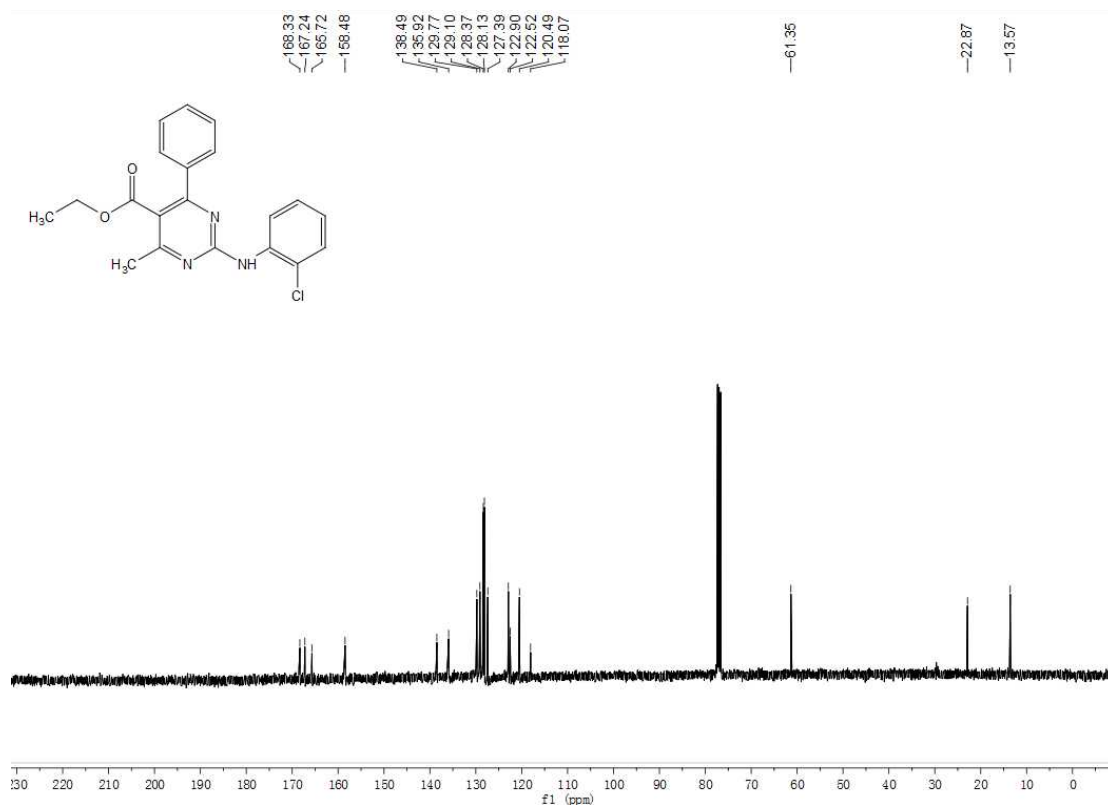

**$^1\text{H}$  and  $^{13}\text{C}$  Spectra of compound 3f ( $\text{CDCl}_3$ , 400 MHz)**

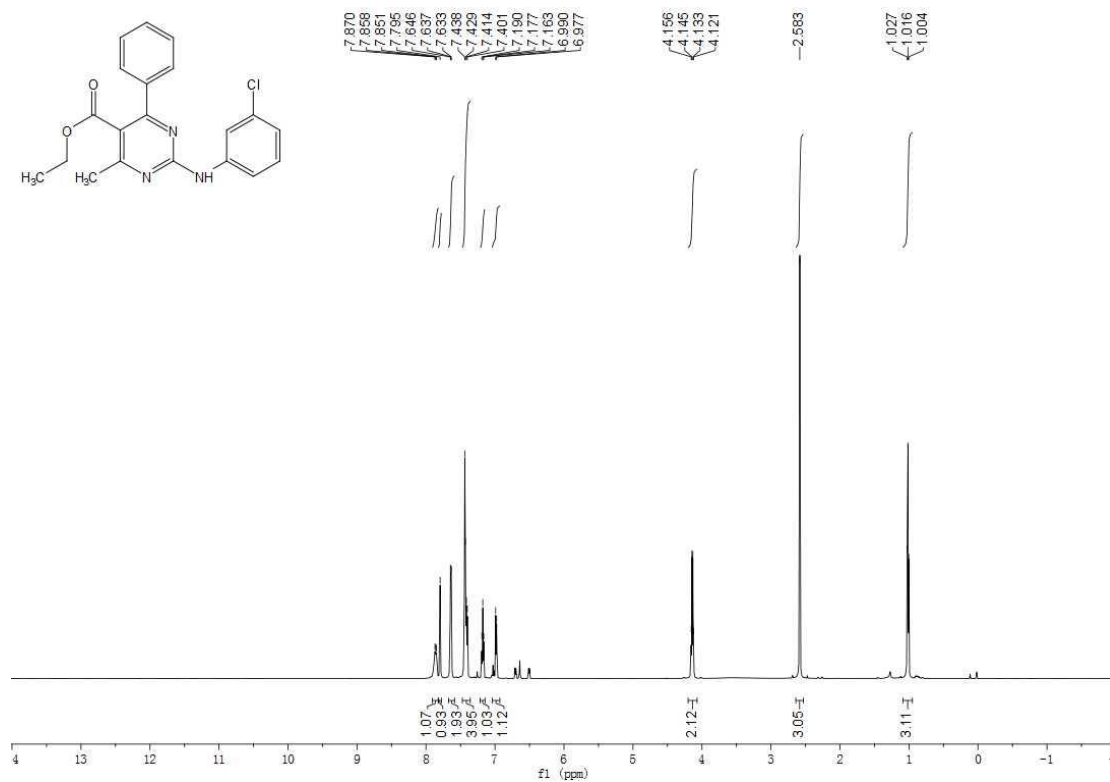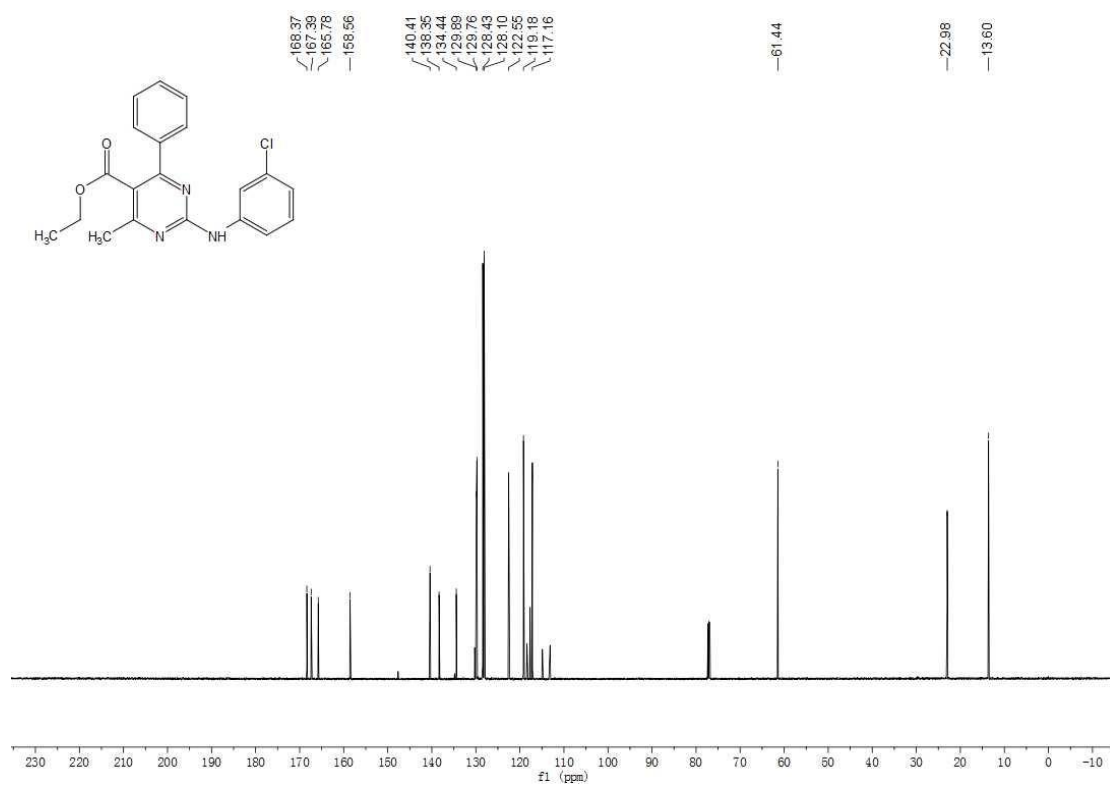

# $^1\text{H}$ and $^{13}\text{C}$ Spectra of compound 3g ( $\text{CDCl}_3$ , 400 MHz)

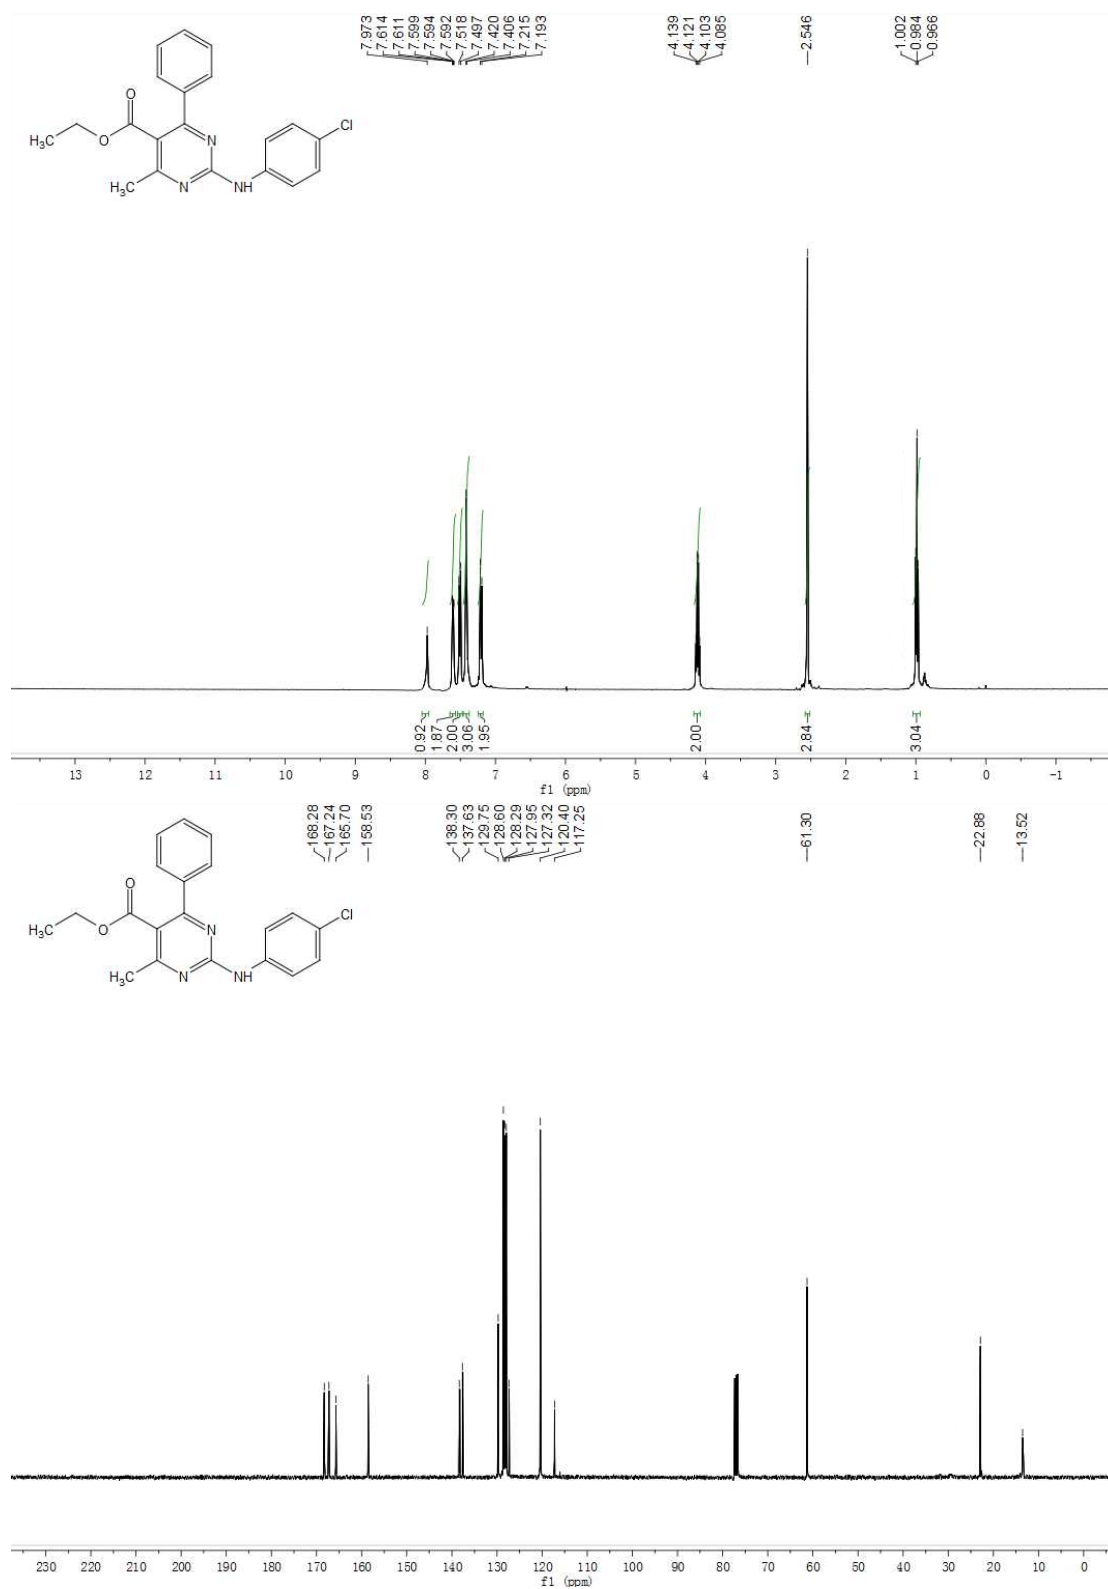

# $^1\text{H}$ and $^{13}\text{C}$ Spectra of compound 3h (CDCl<sub>3</sub>, 400 MHz)

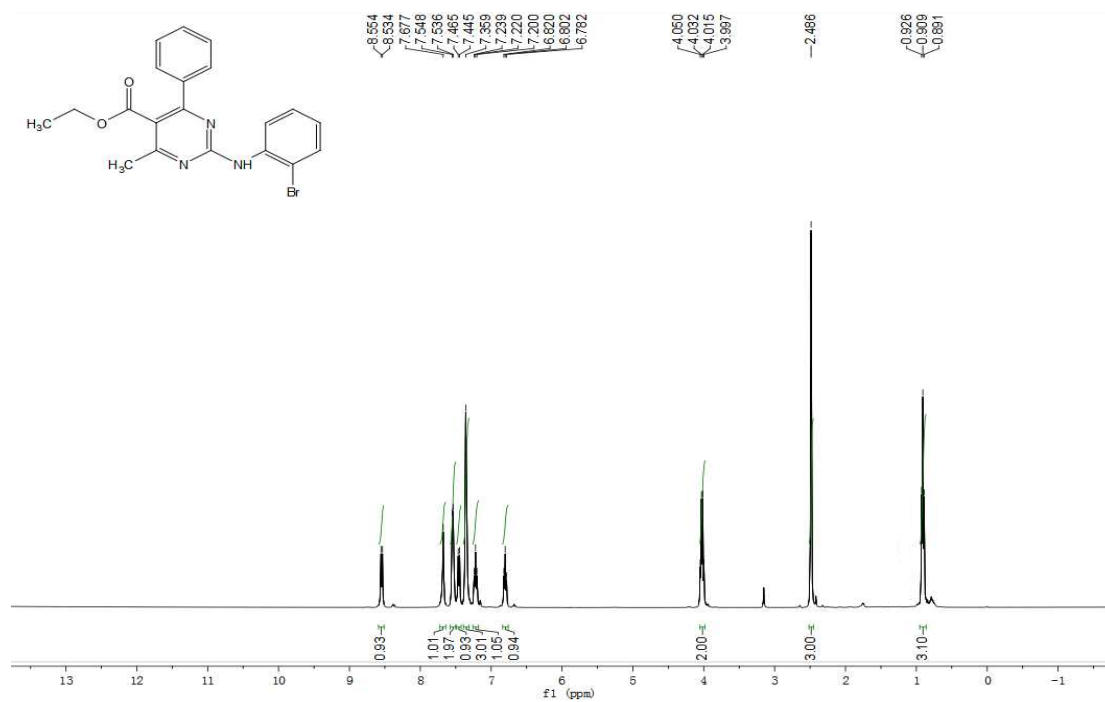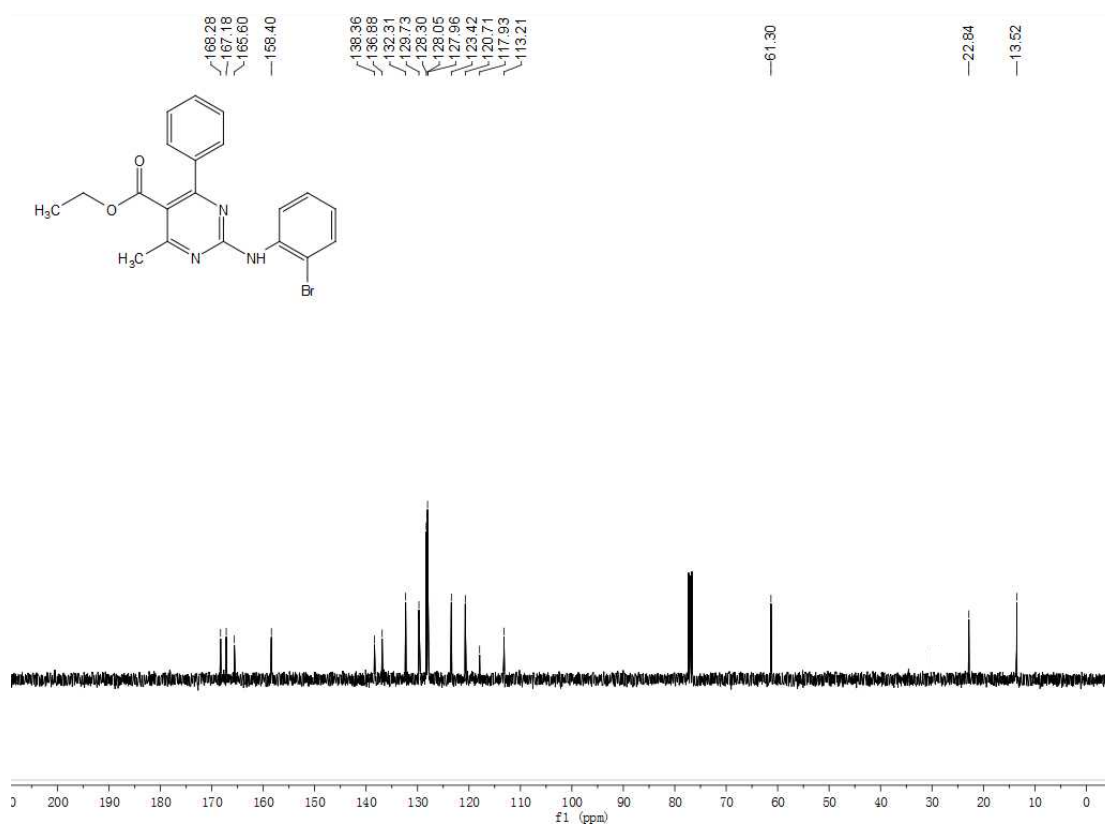

# <sup>1</sup>H and <sup>13</sup>C Spectra of compound 3i (CDCl<sub>3</sub>, 400 MHz)

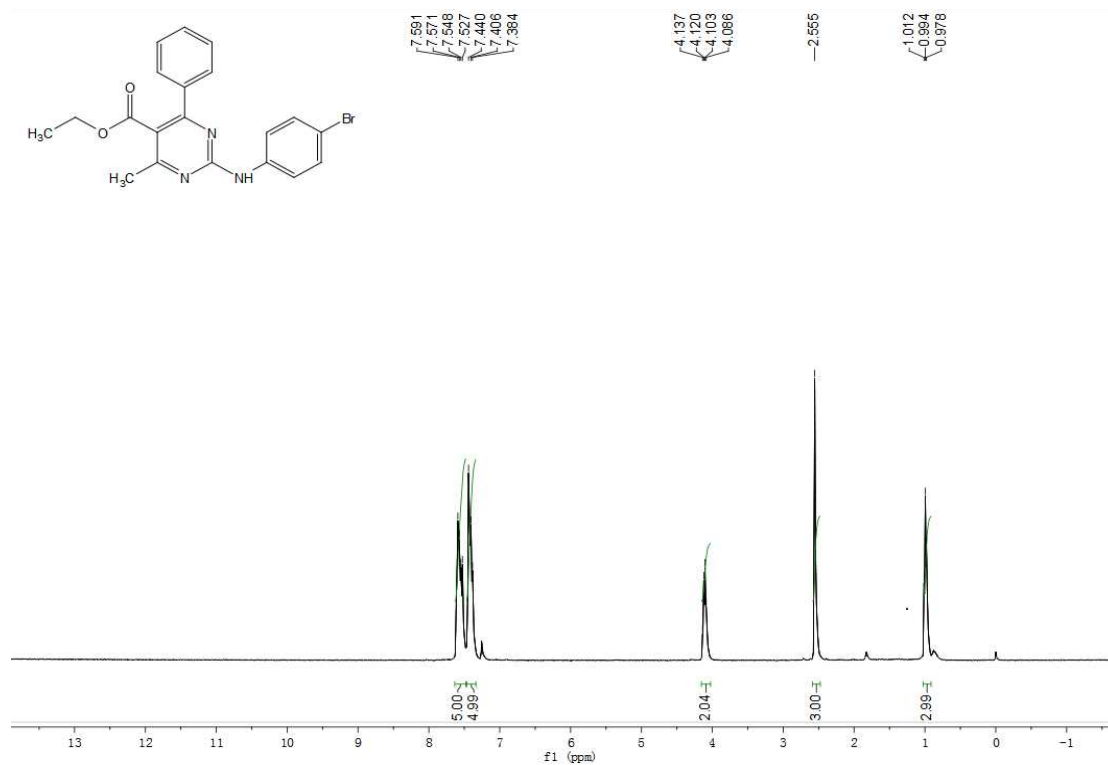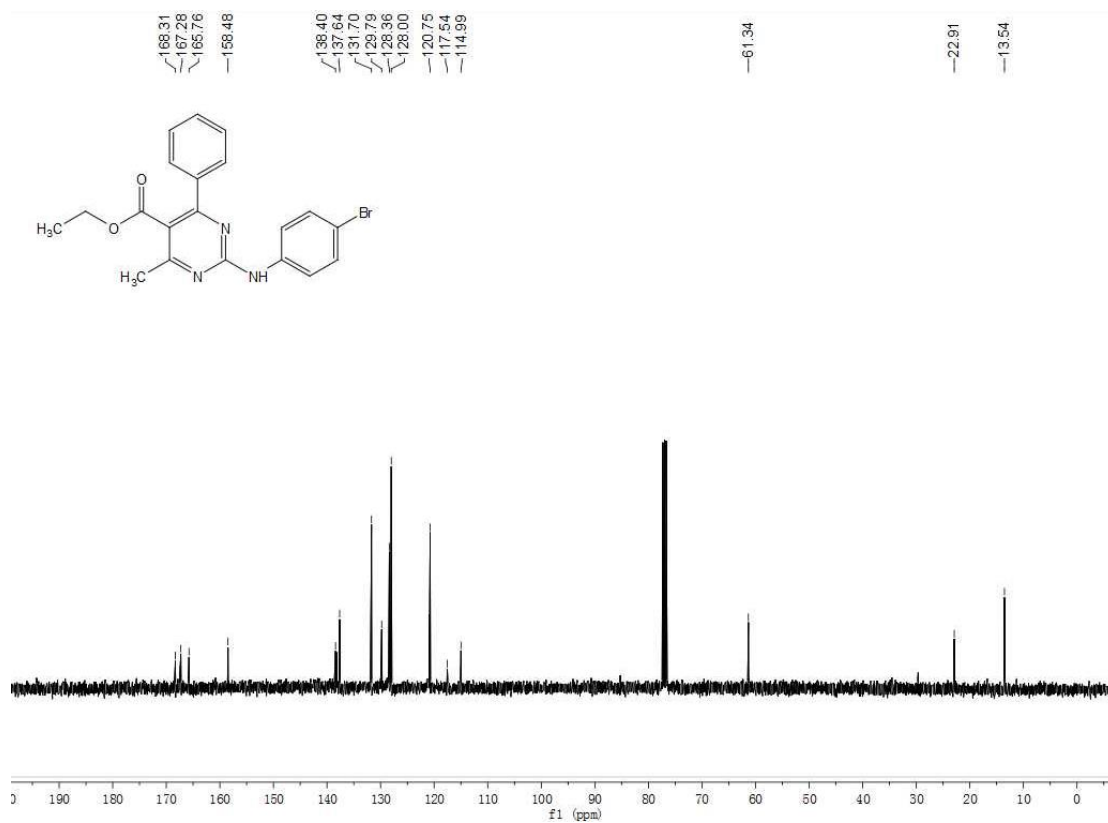



**<sup>1</sup>H and <sup>13</sup>C Spectra of compound 3j (CDCl<sub>3</sub>, 400 MHz)**

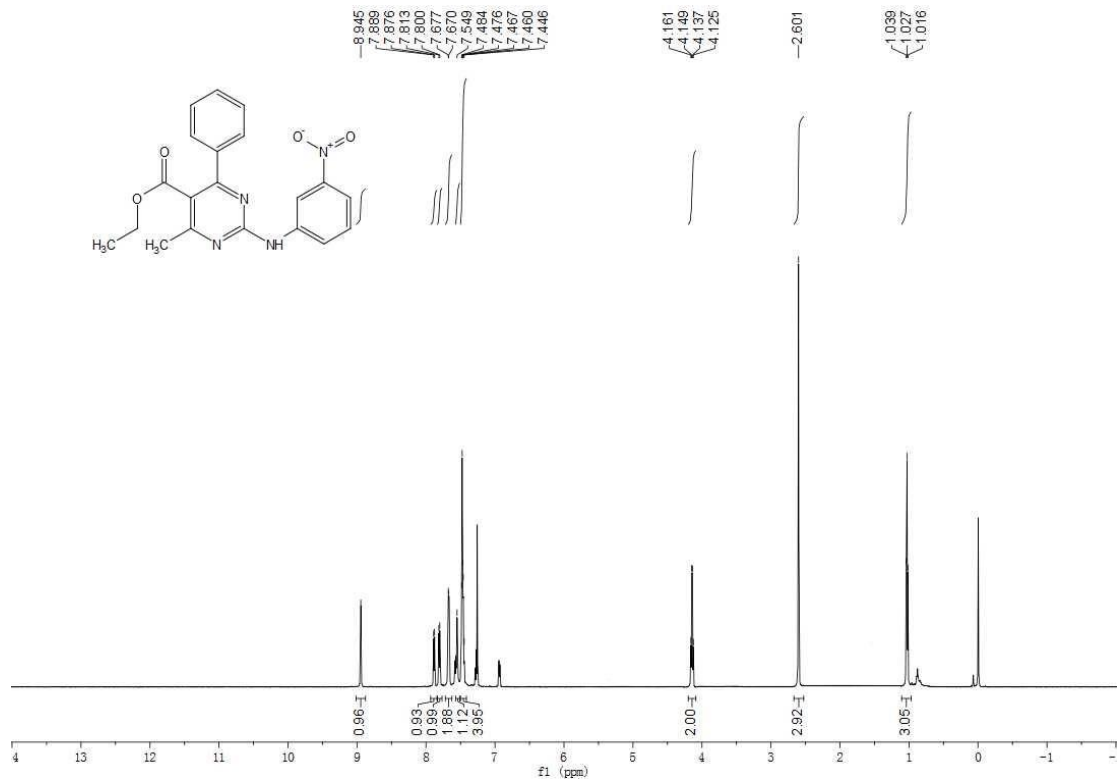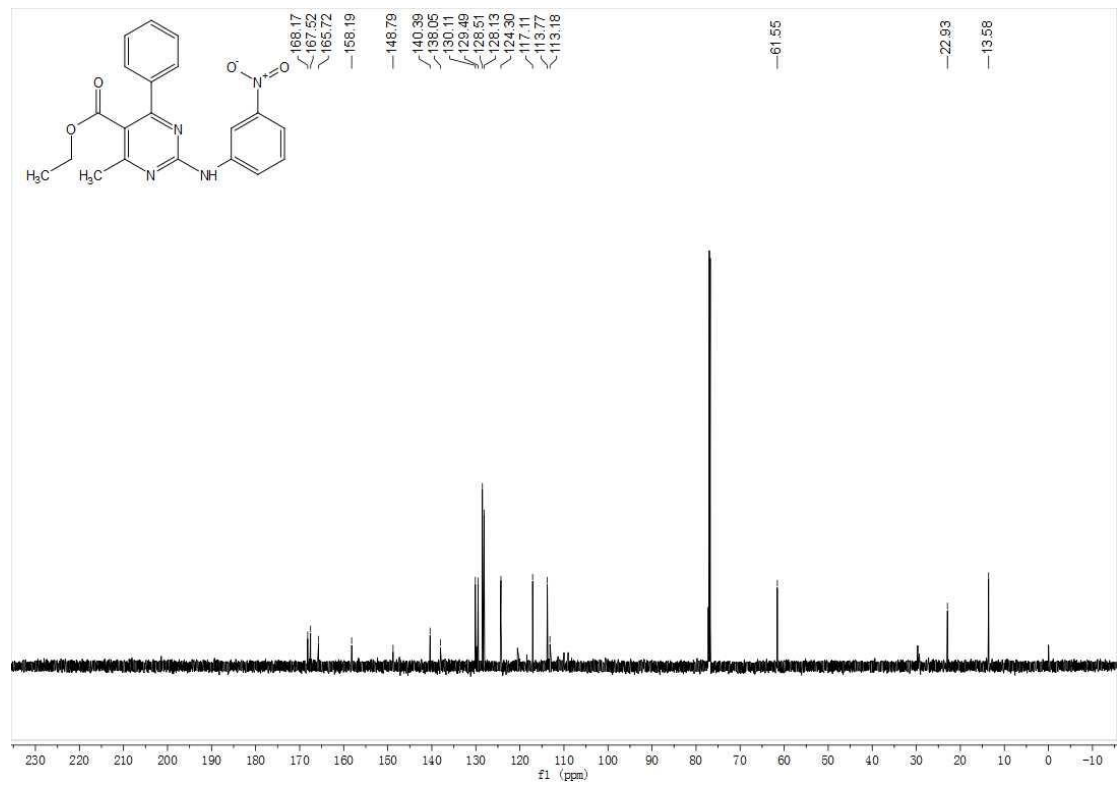

**$^1\text{H}$  and  $^{13}\text{C}$  Spectra of compound 3k ( $\text{CDCl}_3$ , 400 MHz)**

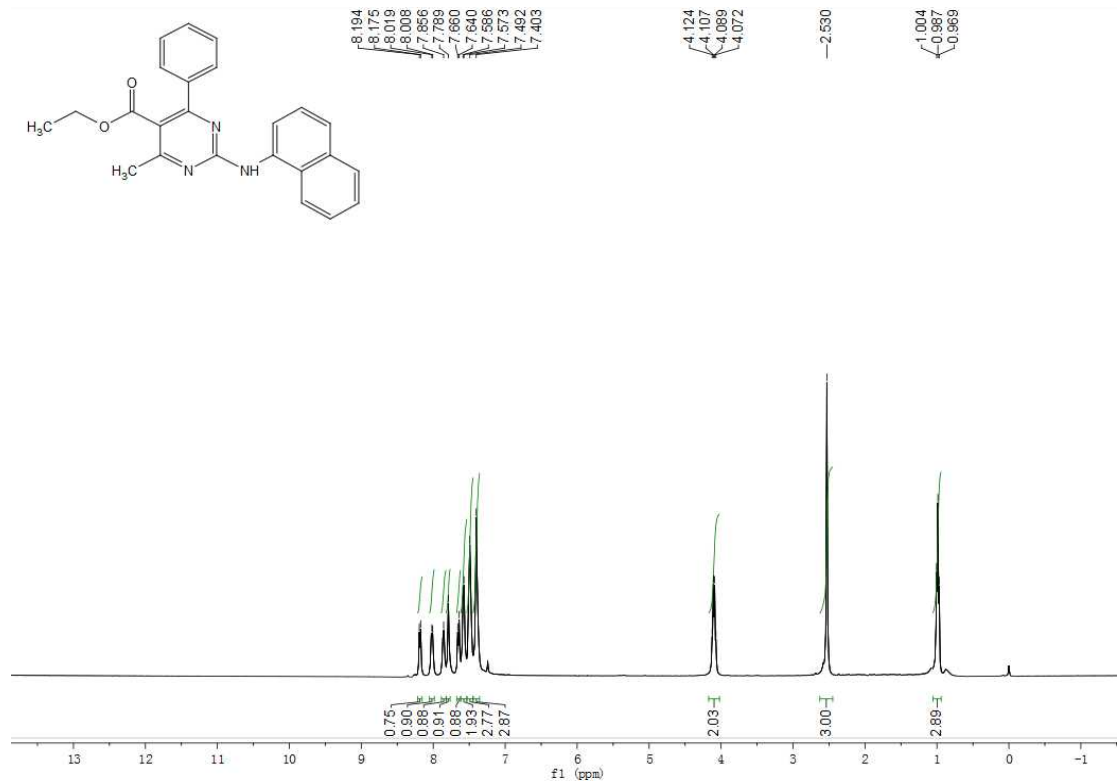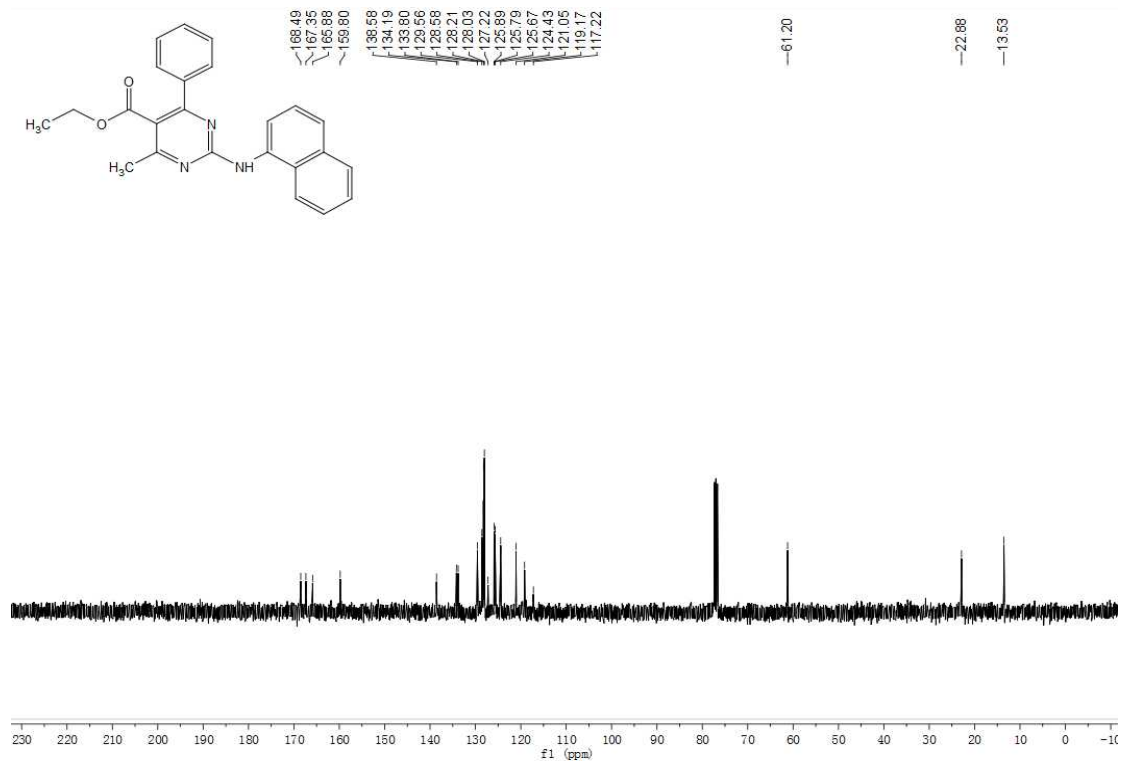

**<sup>1</sup>H and <sup>13</sup>C Spectra of compound 31 (CDCl<sub>3</sub>, 400 MHz)**

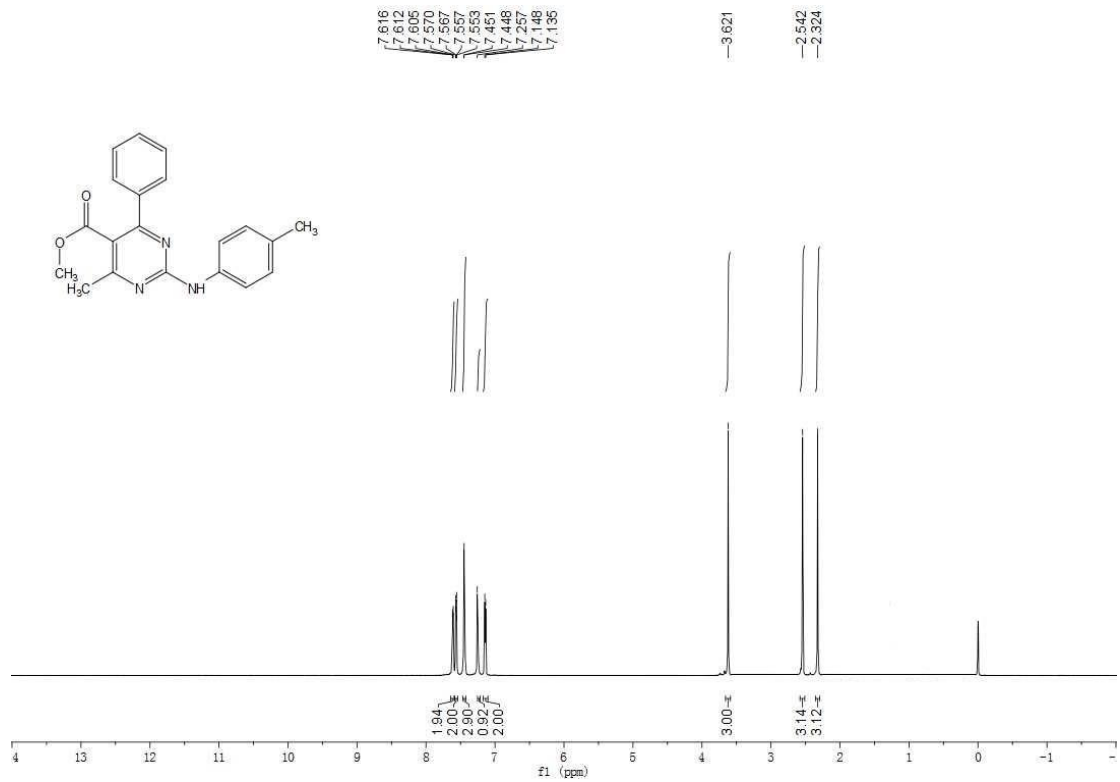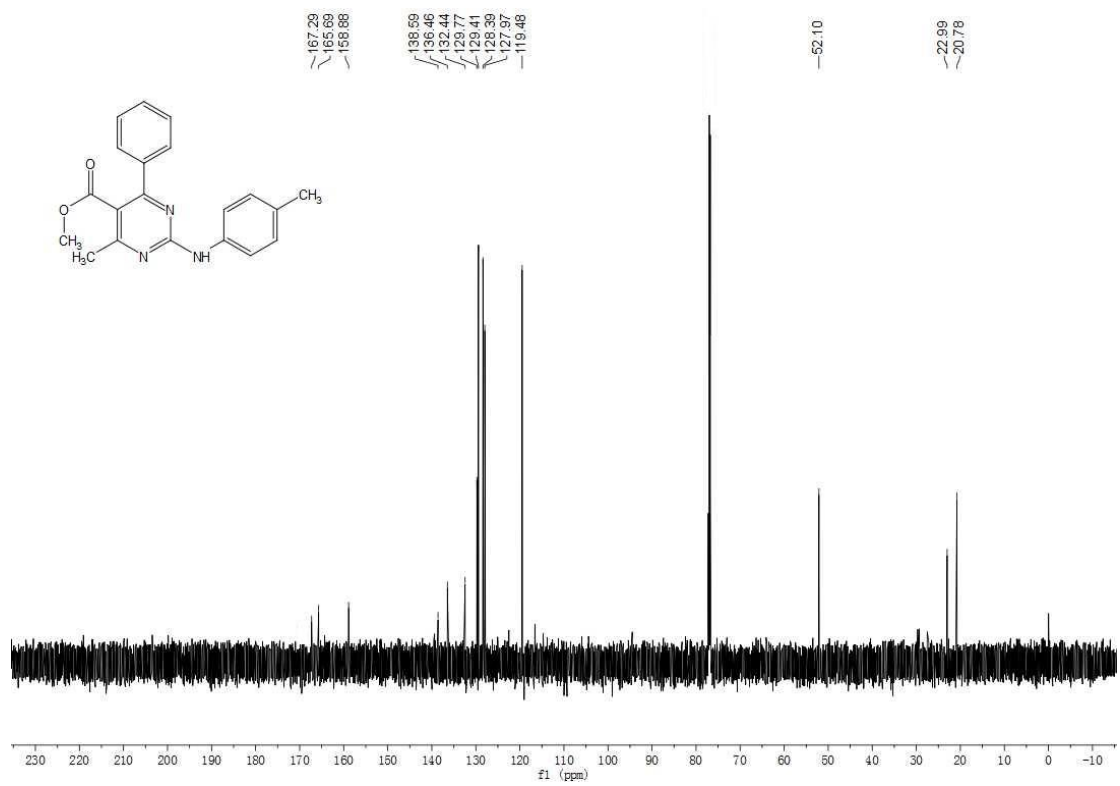

# $^1\text{H}$ and $^{13}\text{C}$ Spectra of compound 3m ( $\text{CDCl}_3$ , 600 MHz)

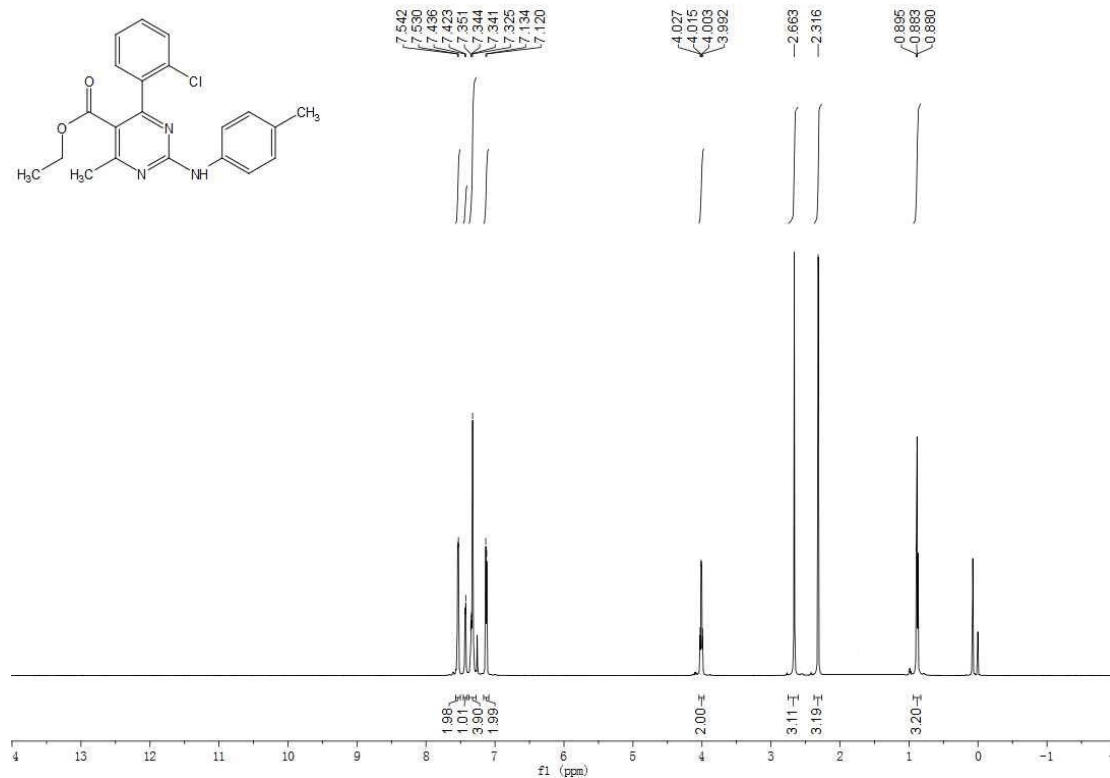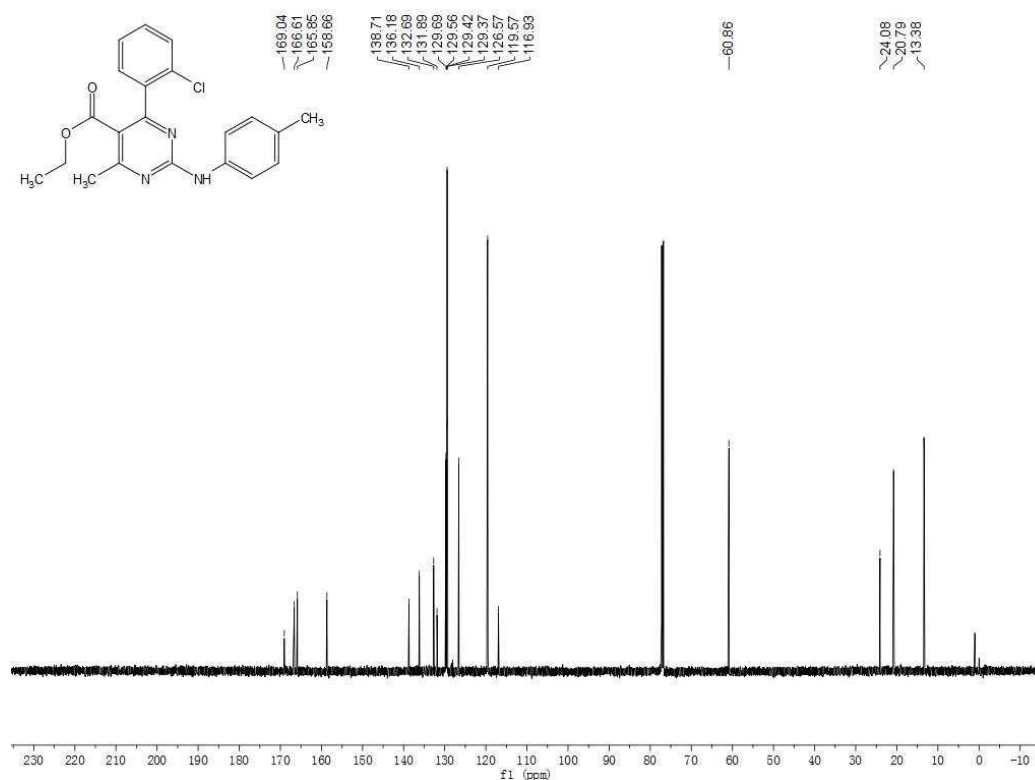

# $^1\text{H}$ and $^{13}\text{C}$ Spectra of compound 3n ( $\text{CDCl}_3$ , 400 MHz)

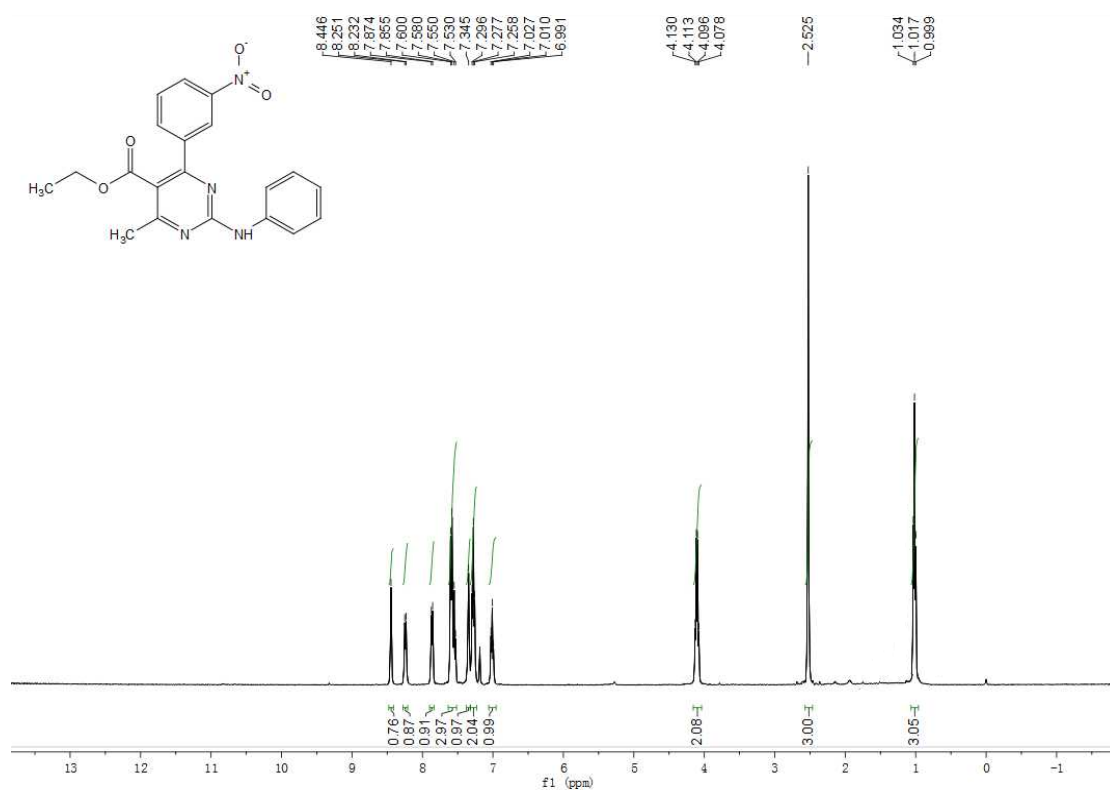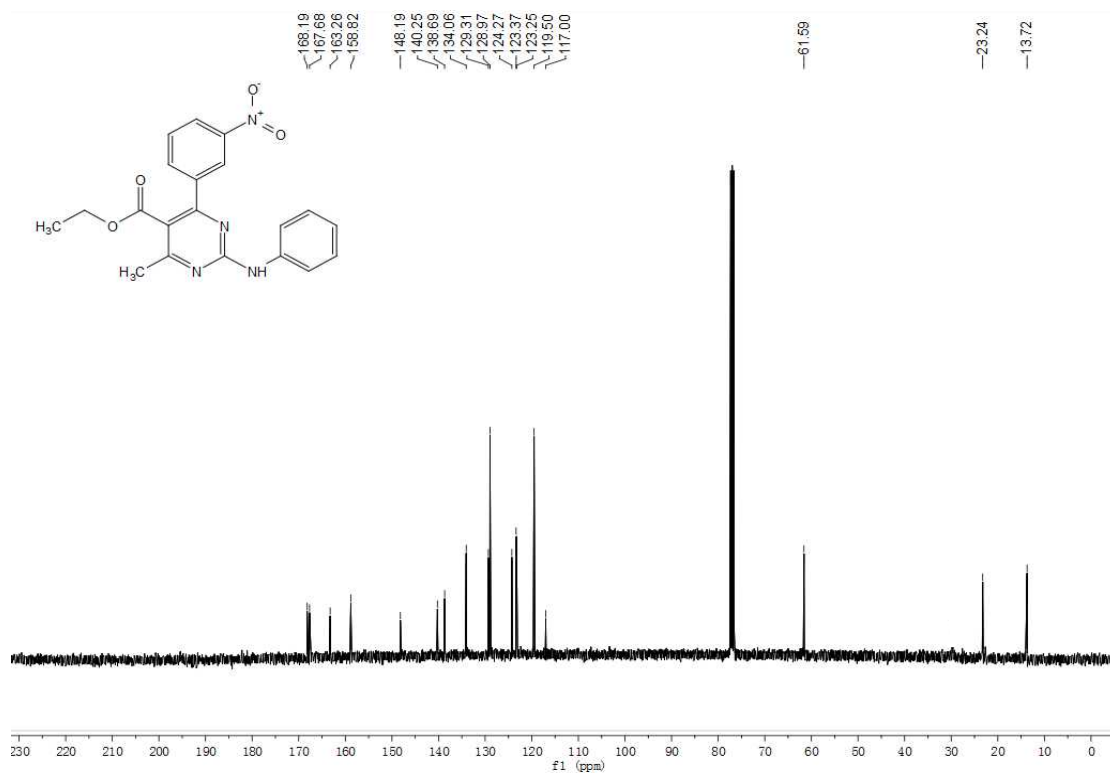

# <sup>1</sup>H and <sup>13</sup>C Spectra of compound 3o (CDCl<sub>3</sub>, 400 MHz)

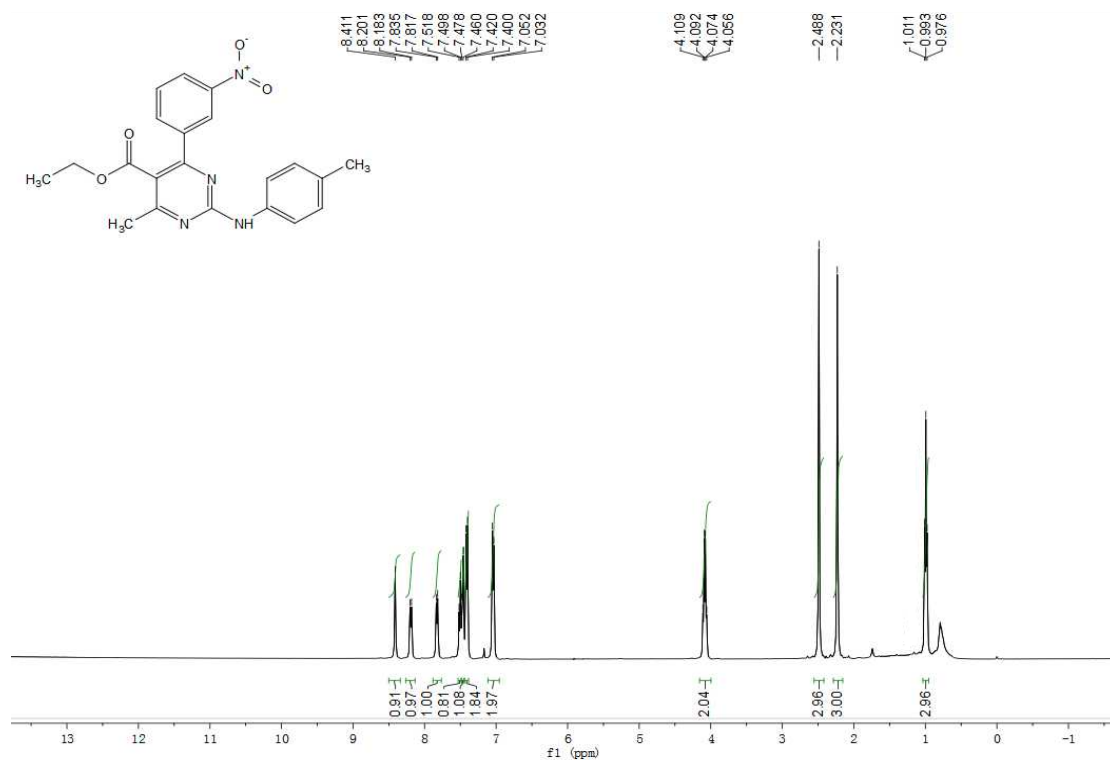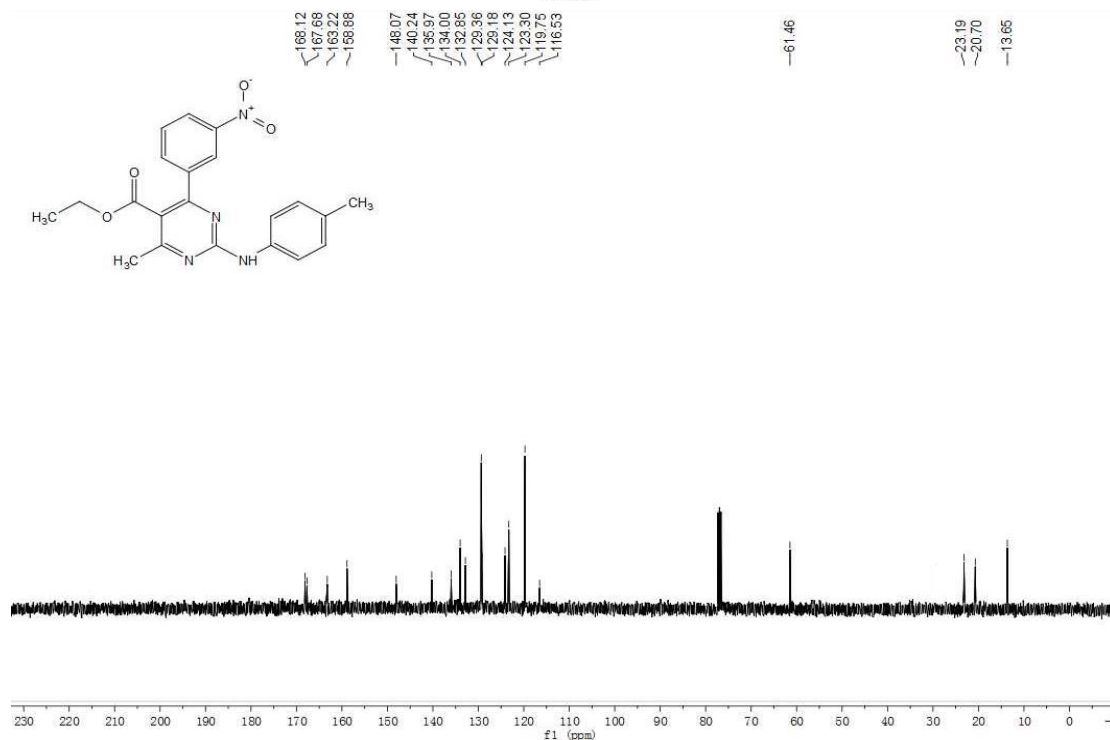

# <sup>1</sup>H and <sup>13</sup>C Spectra of compound 3p (CDCl<sub>3</sub>, 400 MHz)

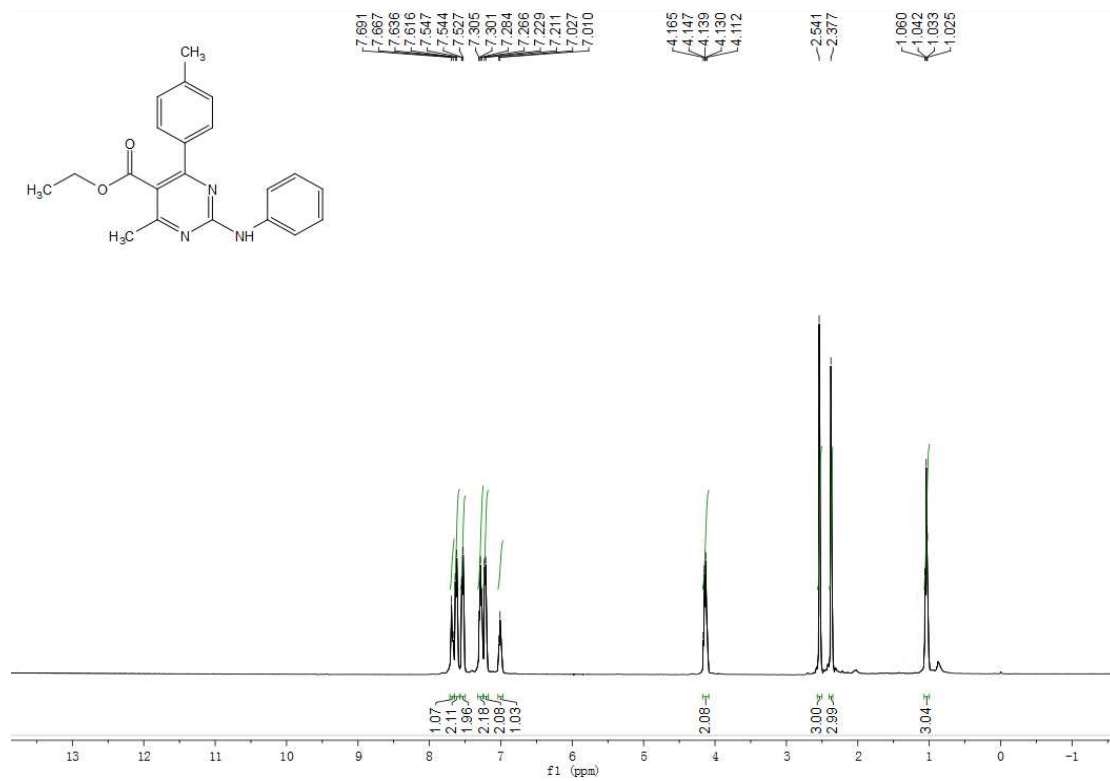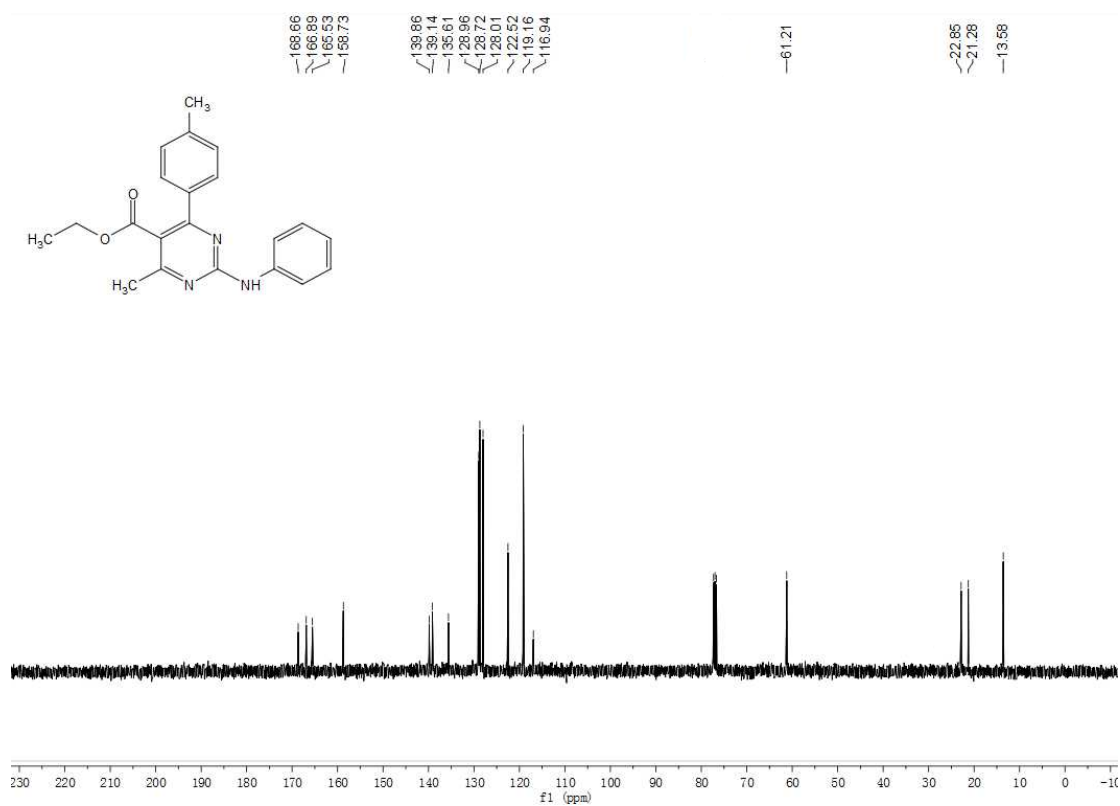

# <sup>1</sup>H and <sup>13</sup>C Spectra of compound 3q (CDCl<sub>3</sub>, 400 MHz)

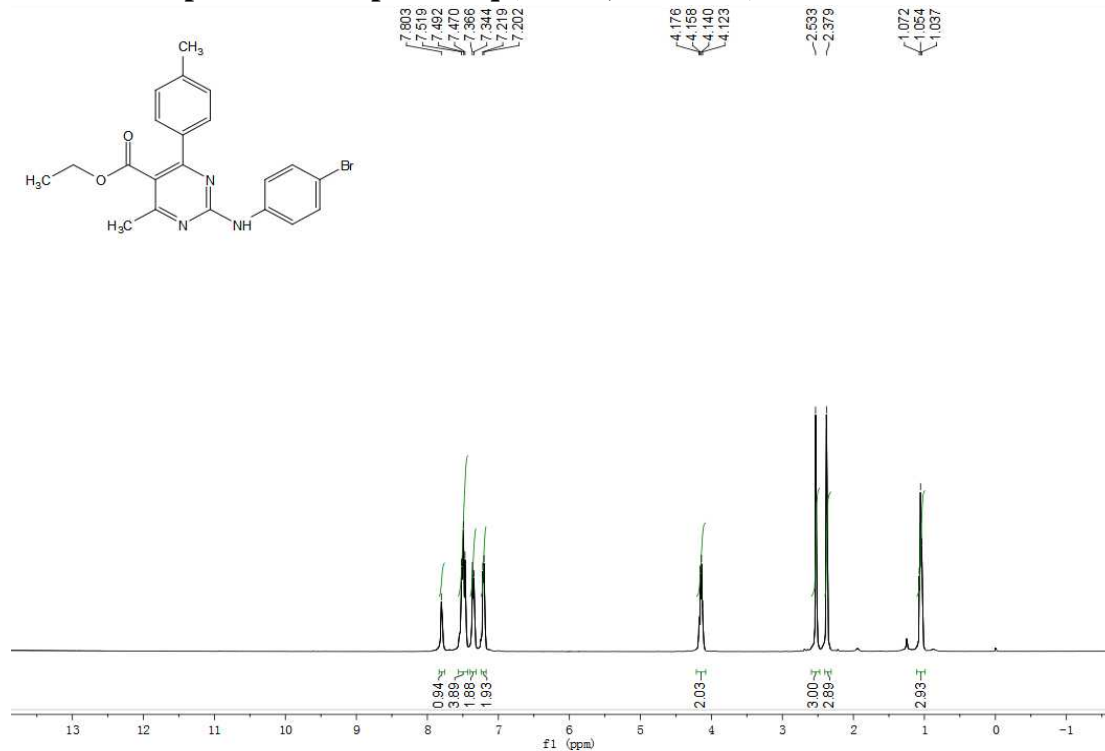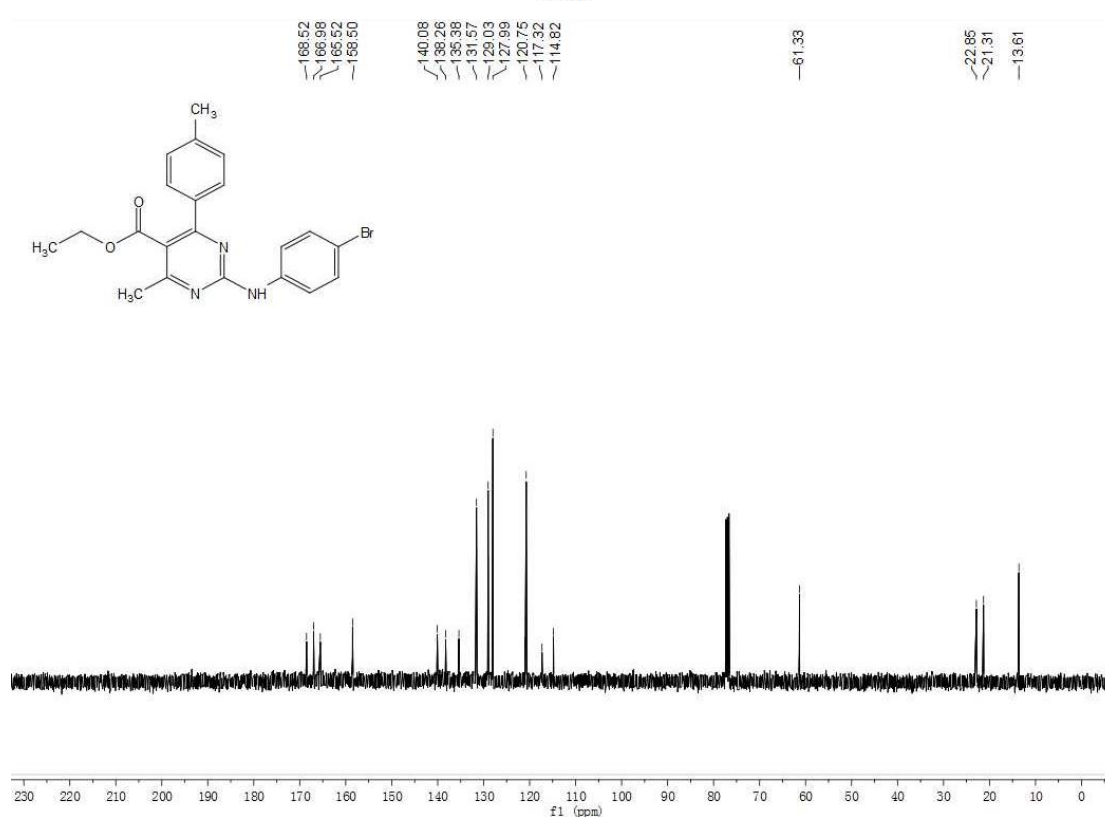



# $^1\text{H}$ and $^{13}\text{C}$ Spectra of compound 3r (CDCl<sub>3</sub>, 400 MHz)

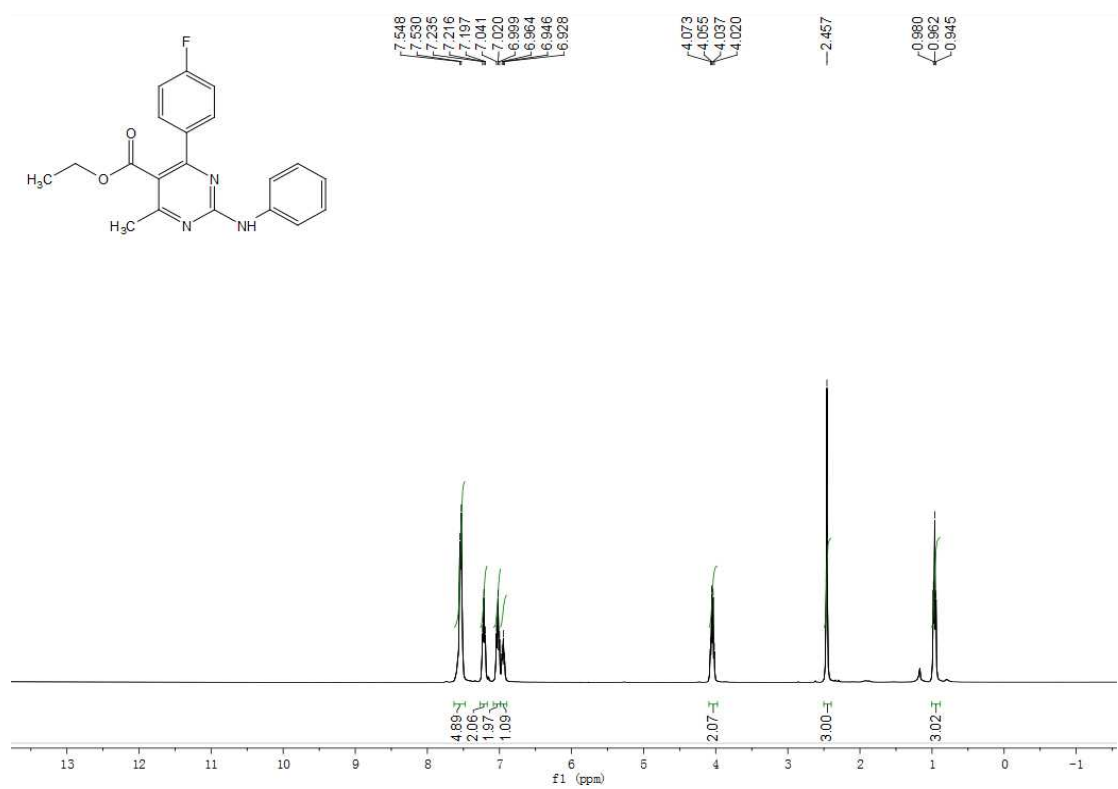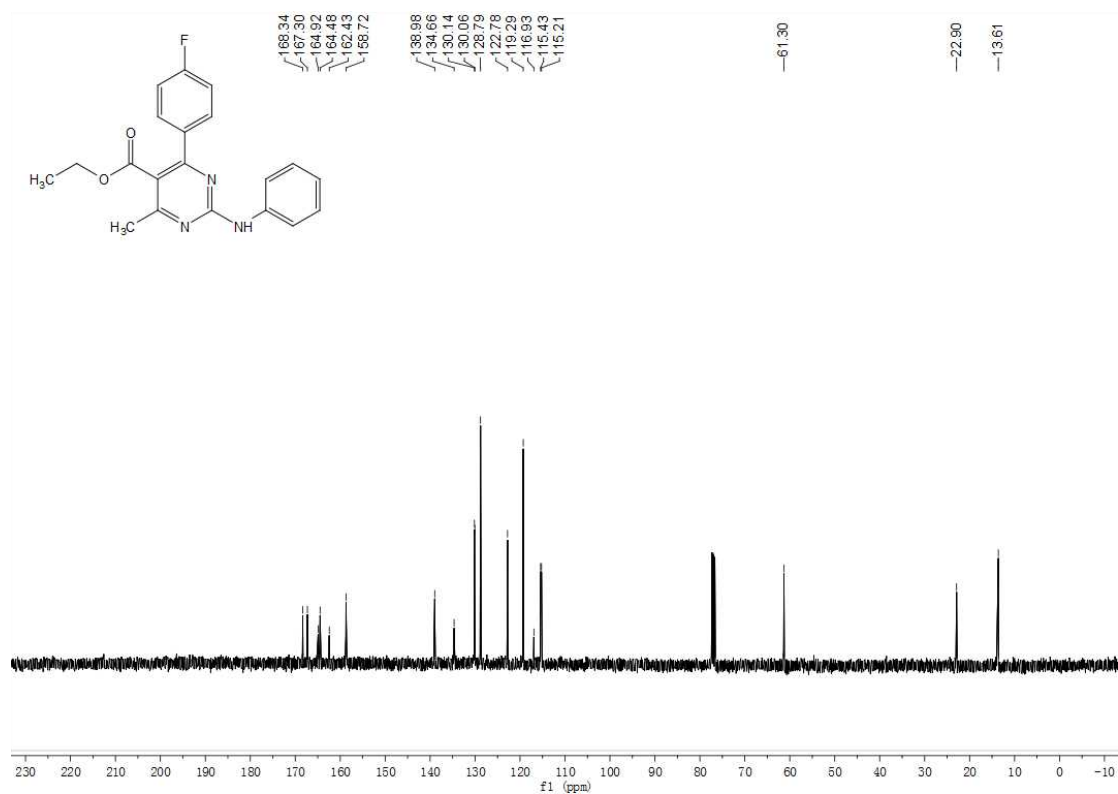

### $^1\text{H}$ and $^{13}\text{C}$ Spectra of compound 3s ( $\text{CDCl}_3$ , 400 MHz)

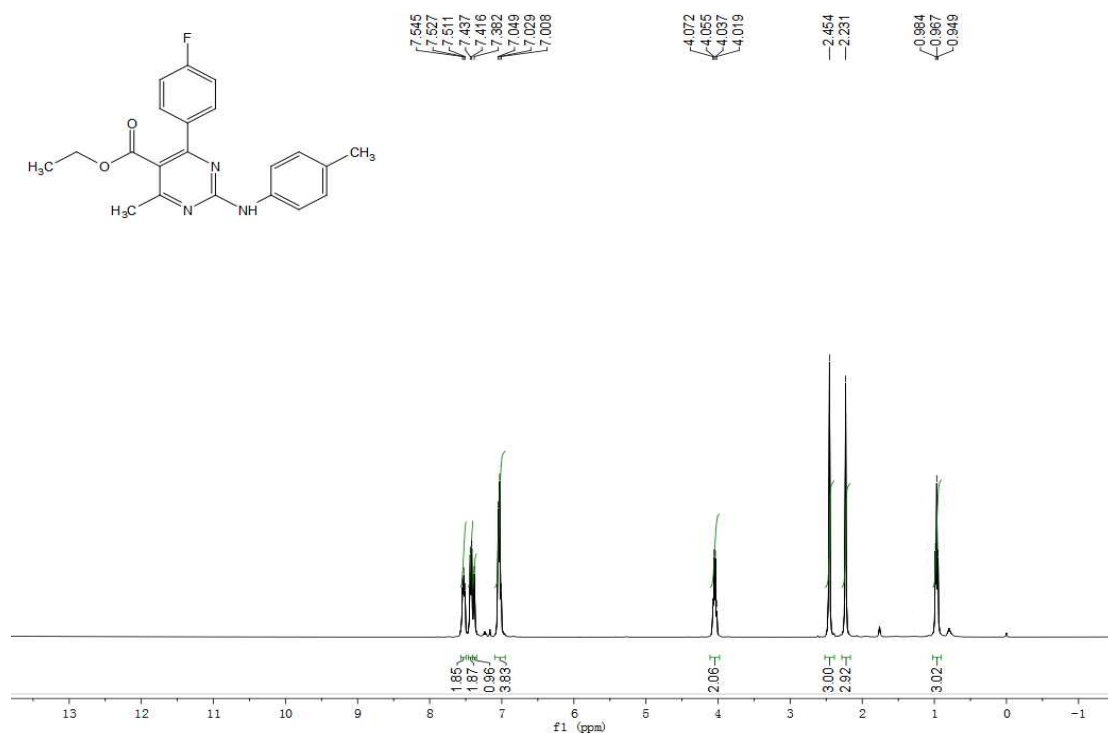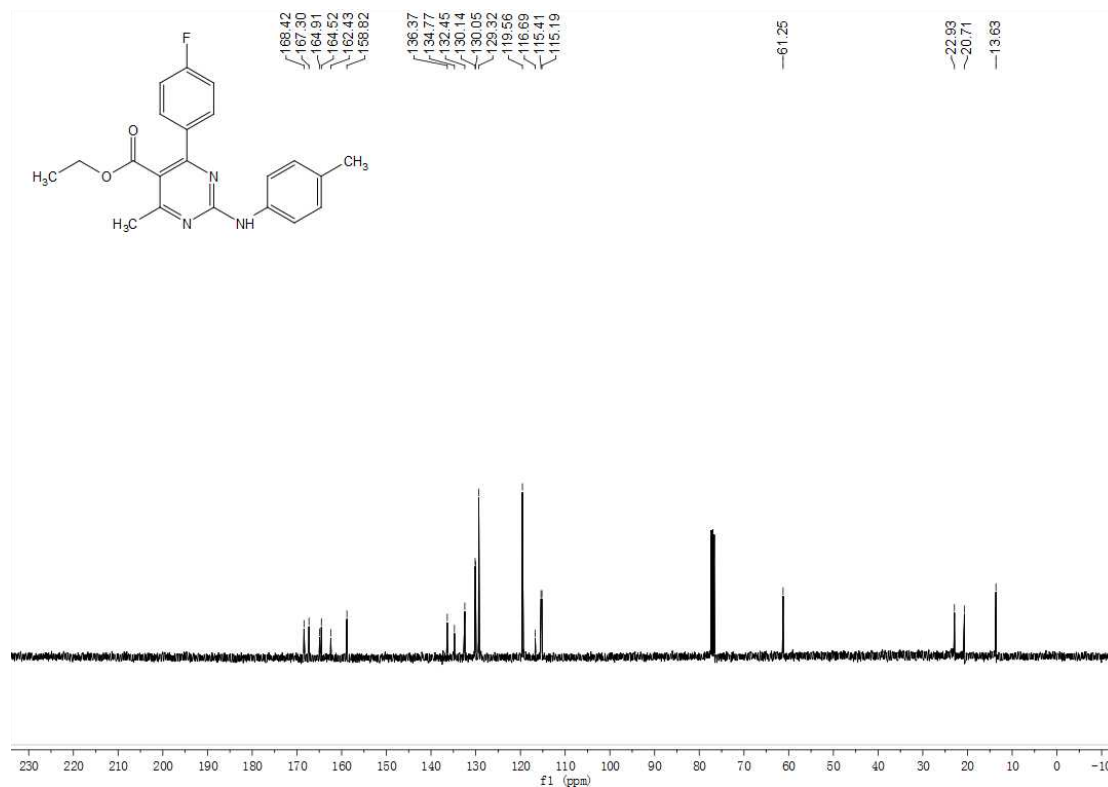

### $^1\text{H}$ and $^{13}\text{C}$ Spectra of compound 3t ( $\text{CDCl}_3$ , 400 MHz)

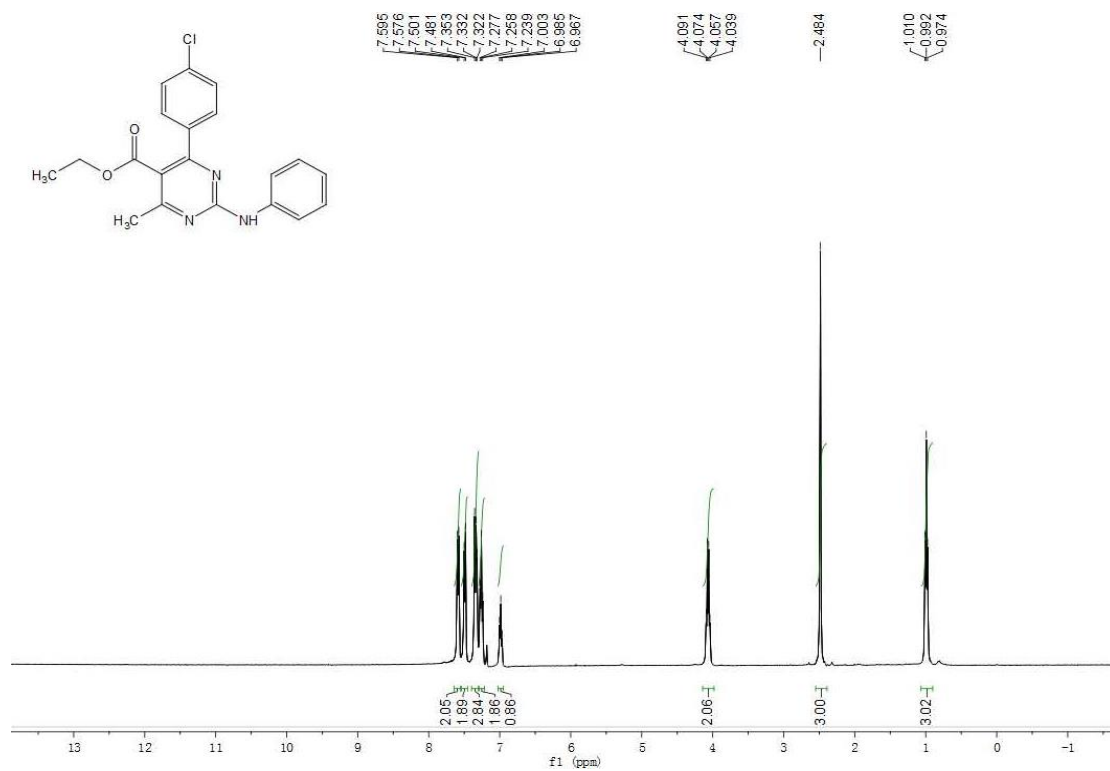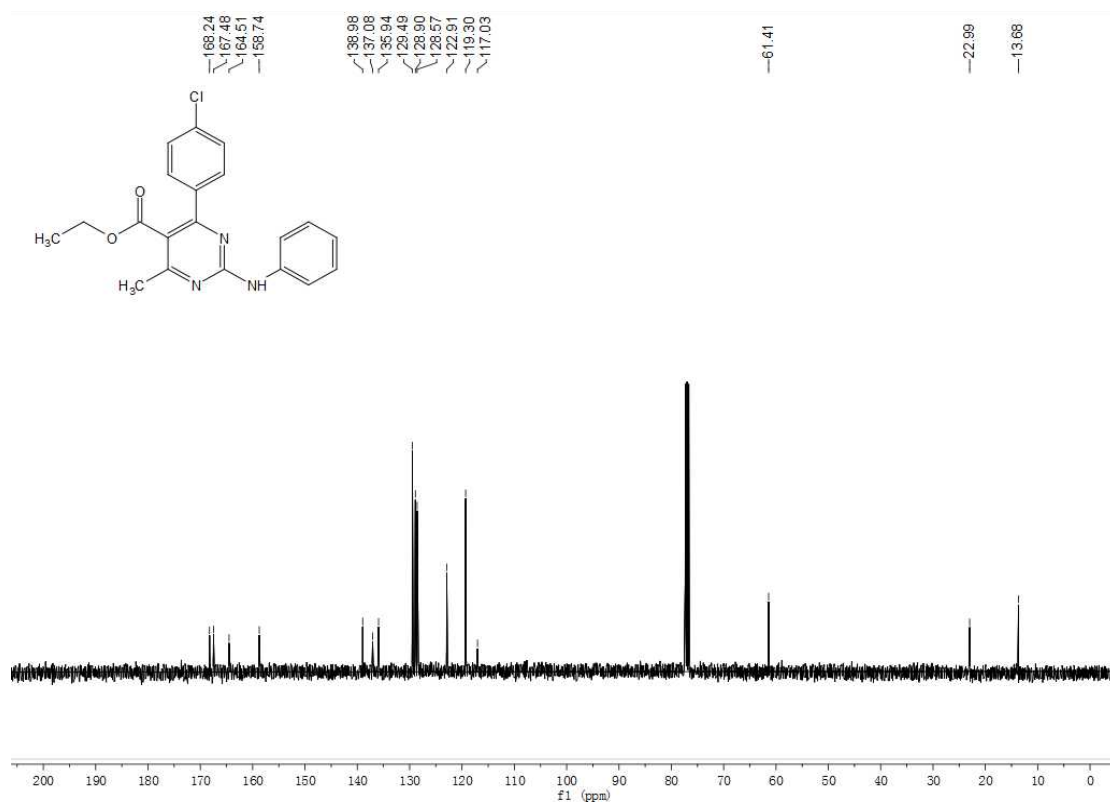

# <sup>1</sup>H and <sup>13</sup>C Spectra of compound 3u (CDCl<sub>3</sub>, 400 MHz)

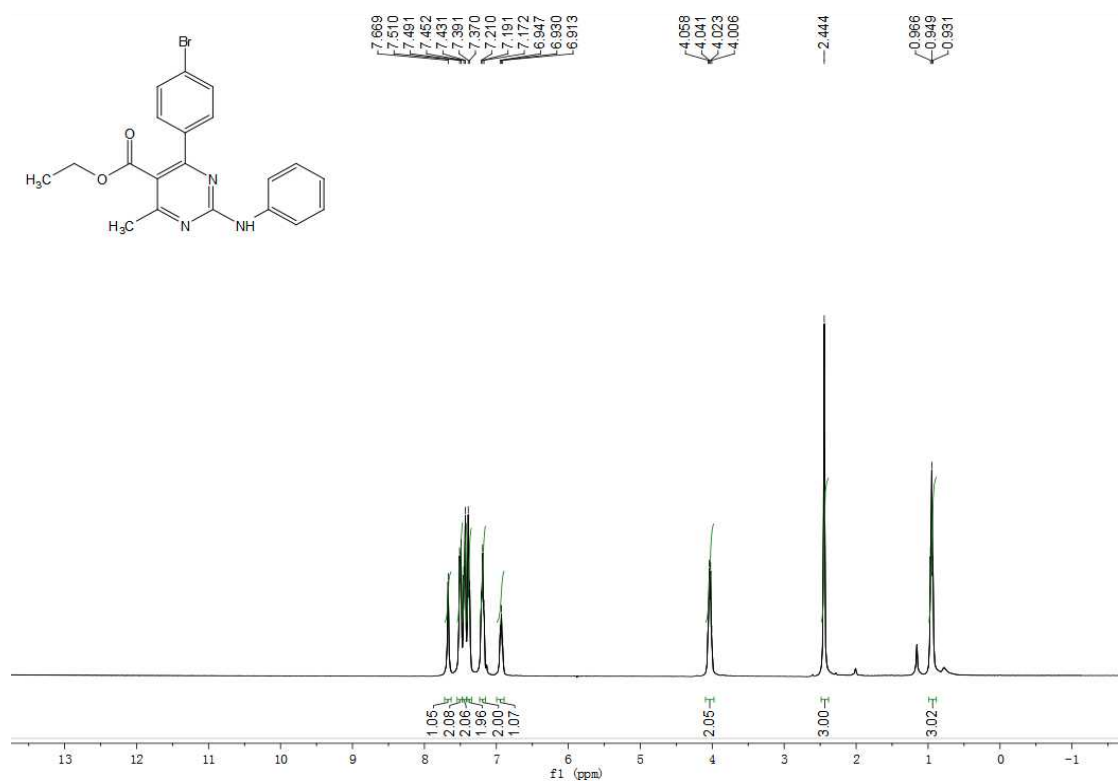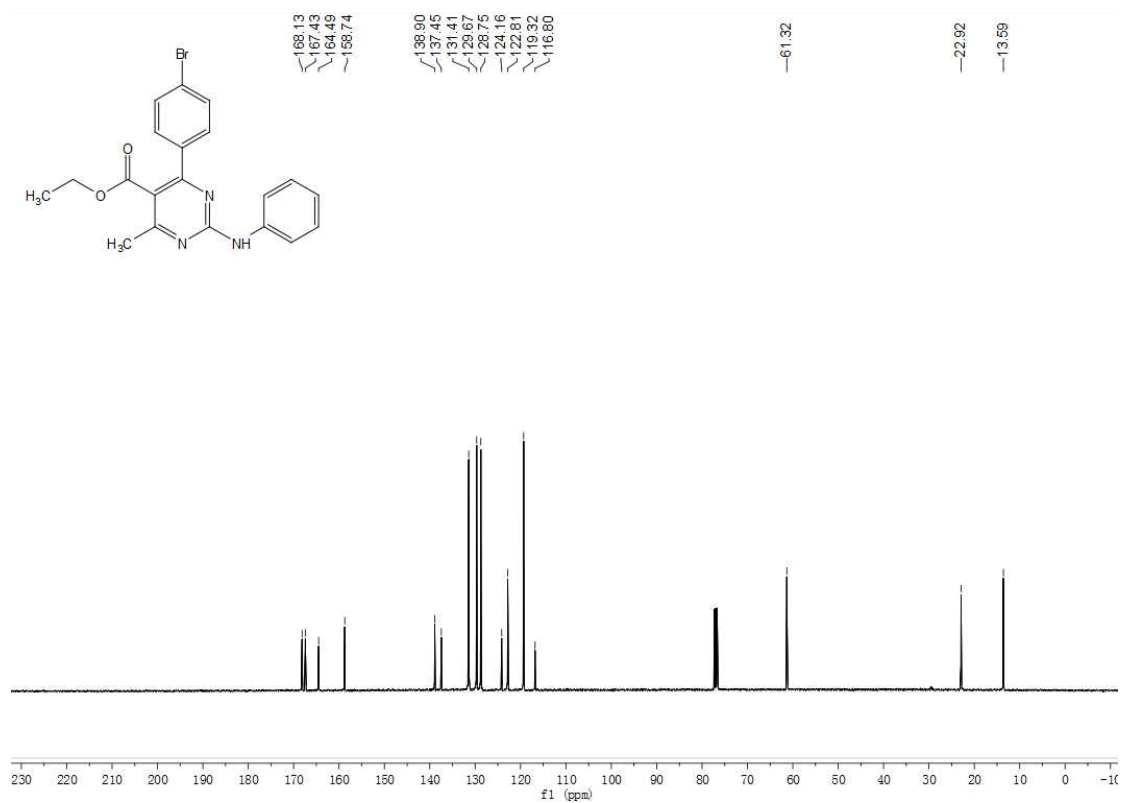

# <sup>1</sup>H and <sup>13</sup>C Spectra of compound 5a (CDCl<sub>3</sub>, 400 MHz)

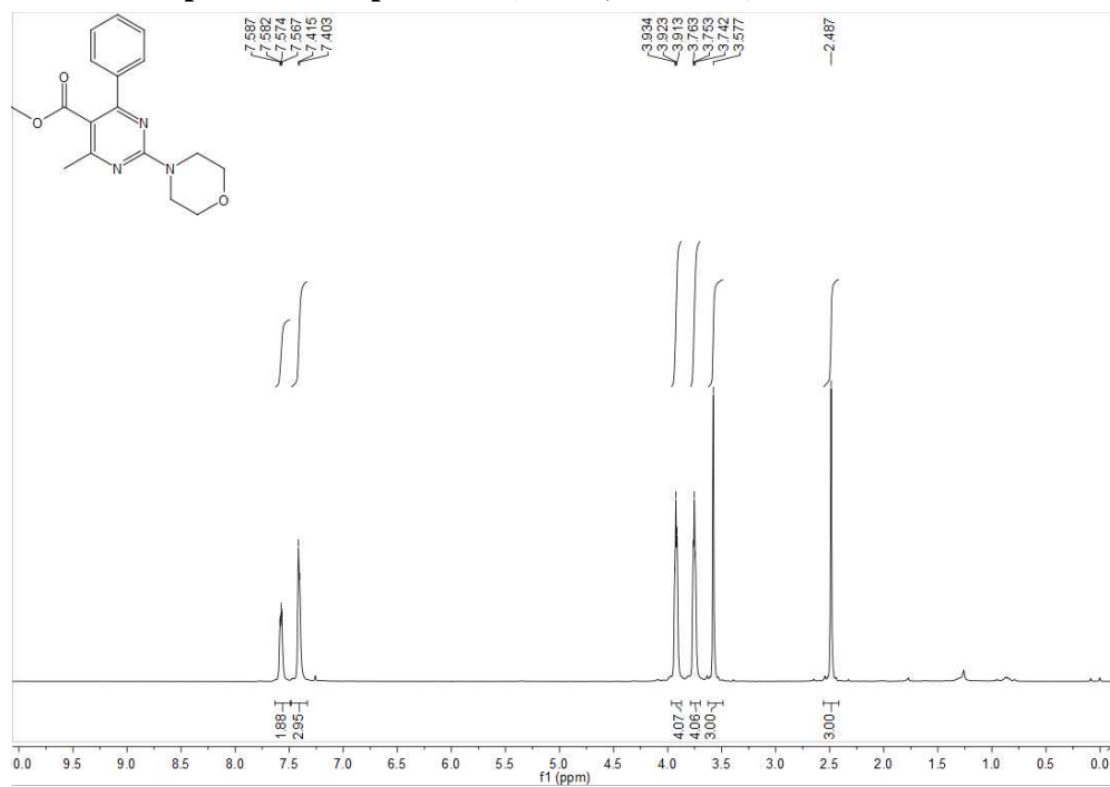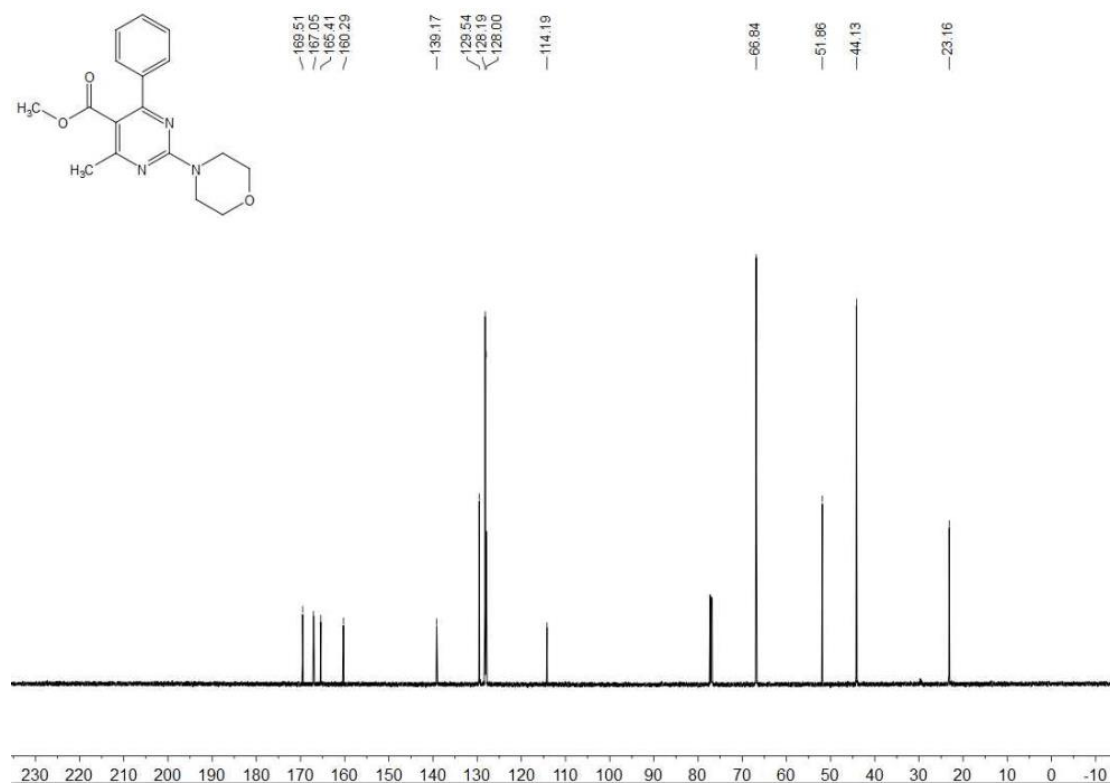

# <sup>1</sup>H and <sup>13</sup>C Spectra of compound 5b (CDCl<sub>3</sub>, 400 MHz)

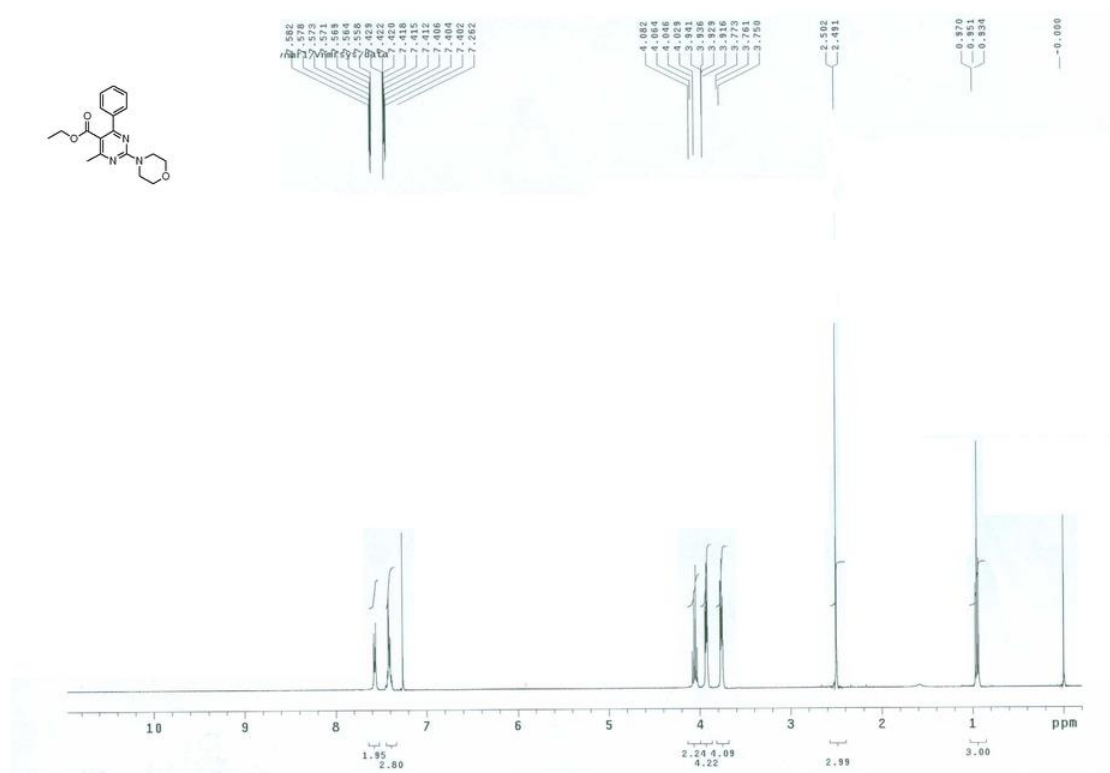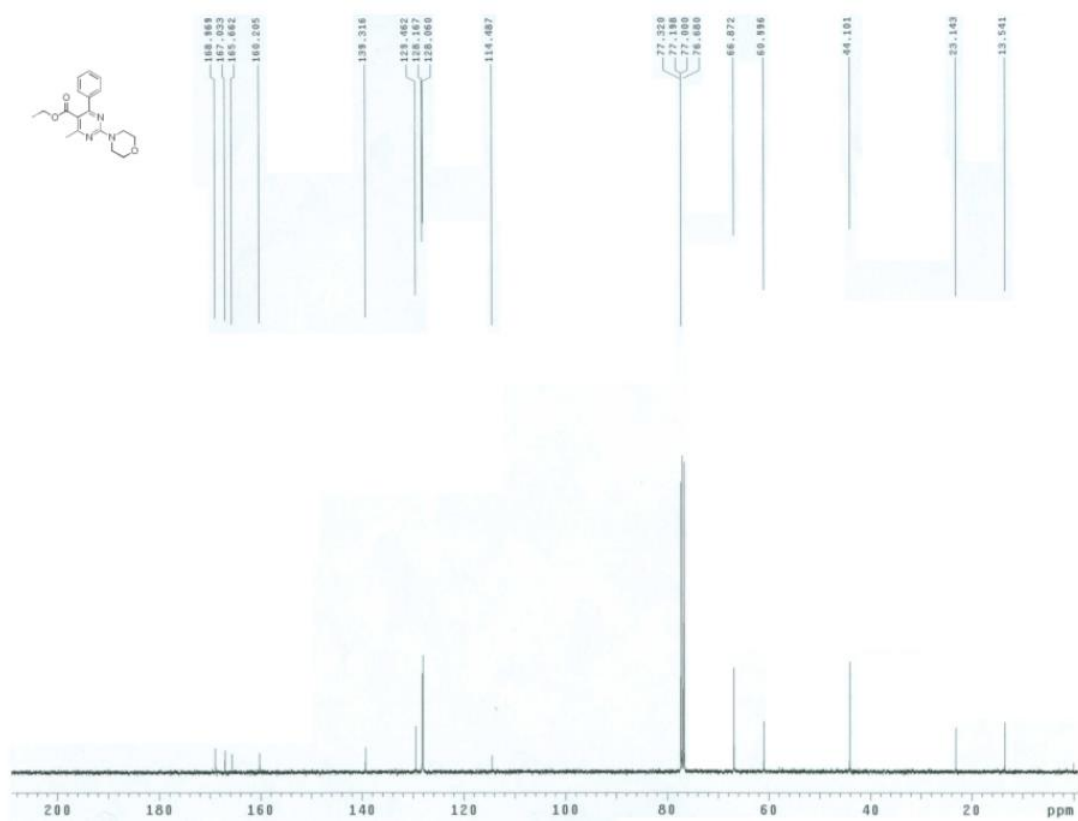

**<sup>1</sup>H and <sup>13</sup>C Spectra of compound 5c (CDCl<sub>3</sub>, 400 MHz)**

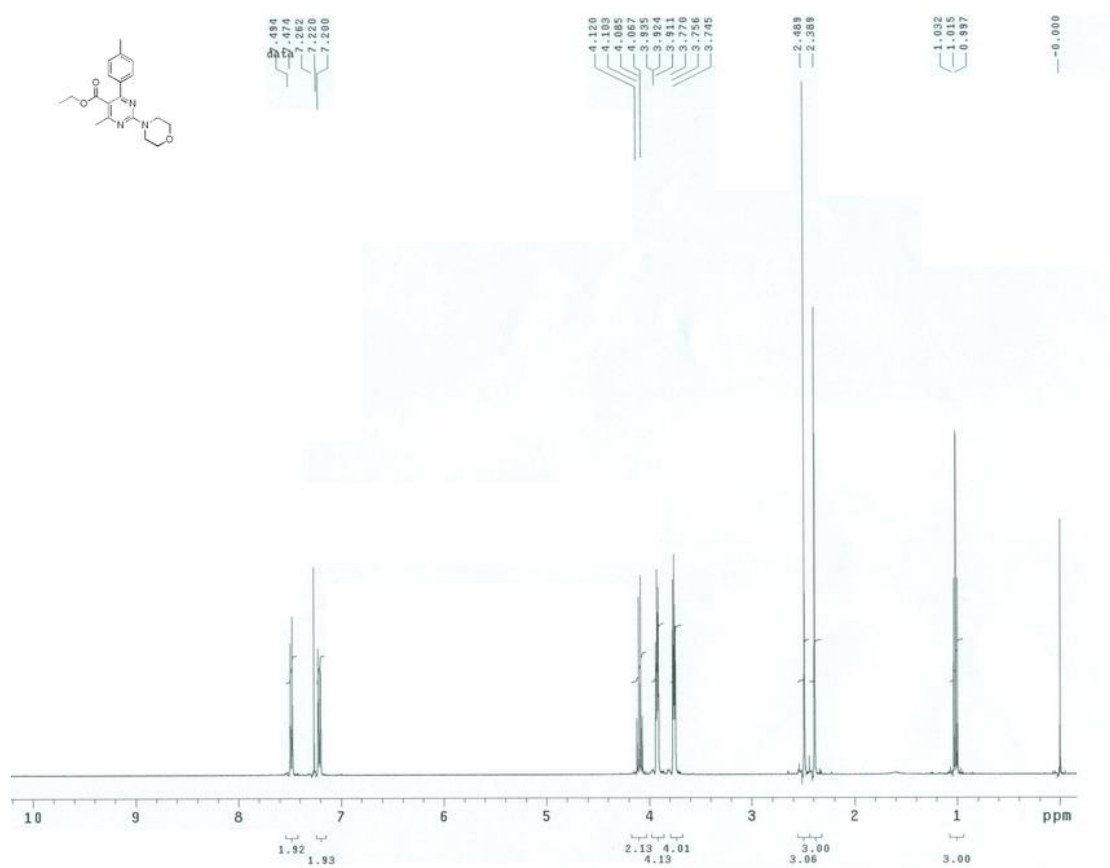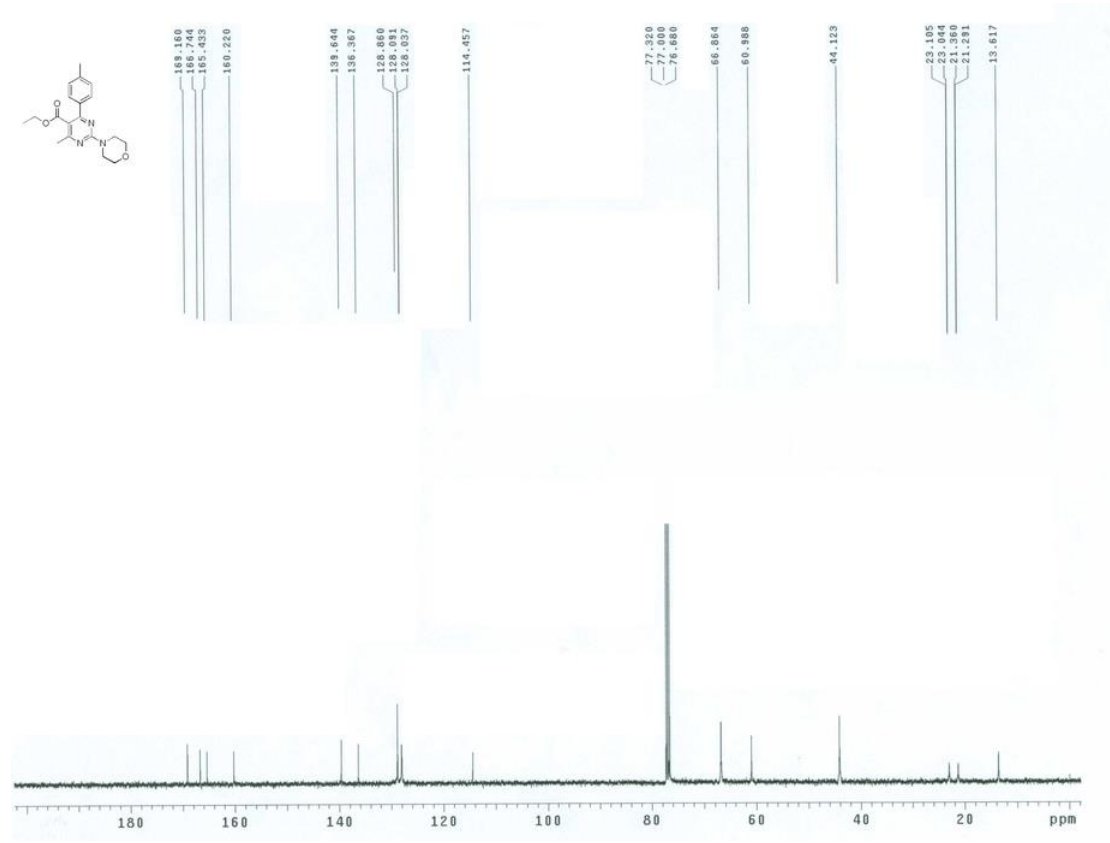

# <sup>1</sup>H and <sup>13</sup>C Spectra of compound 5d (CDCl<sub>3</sub>, 400 MHz)

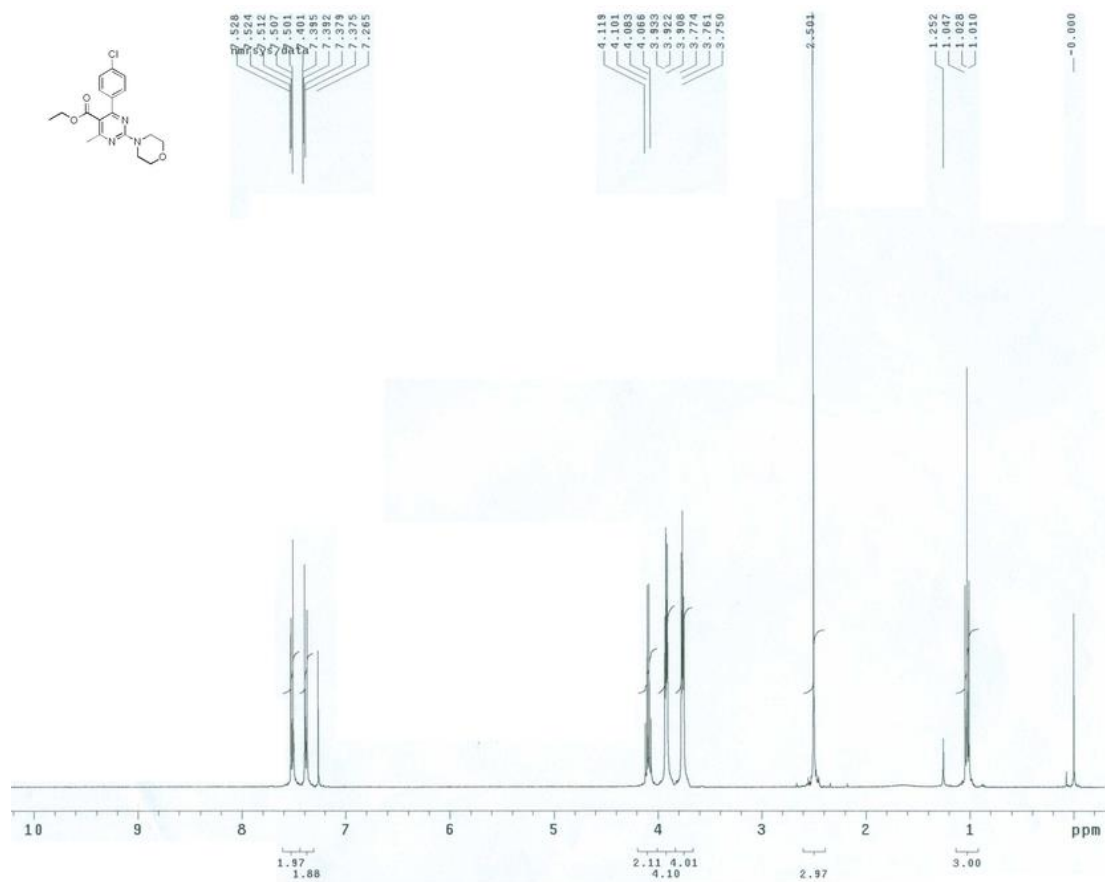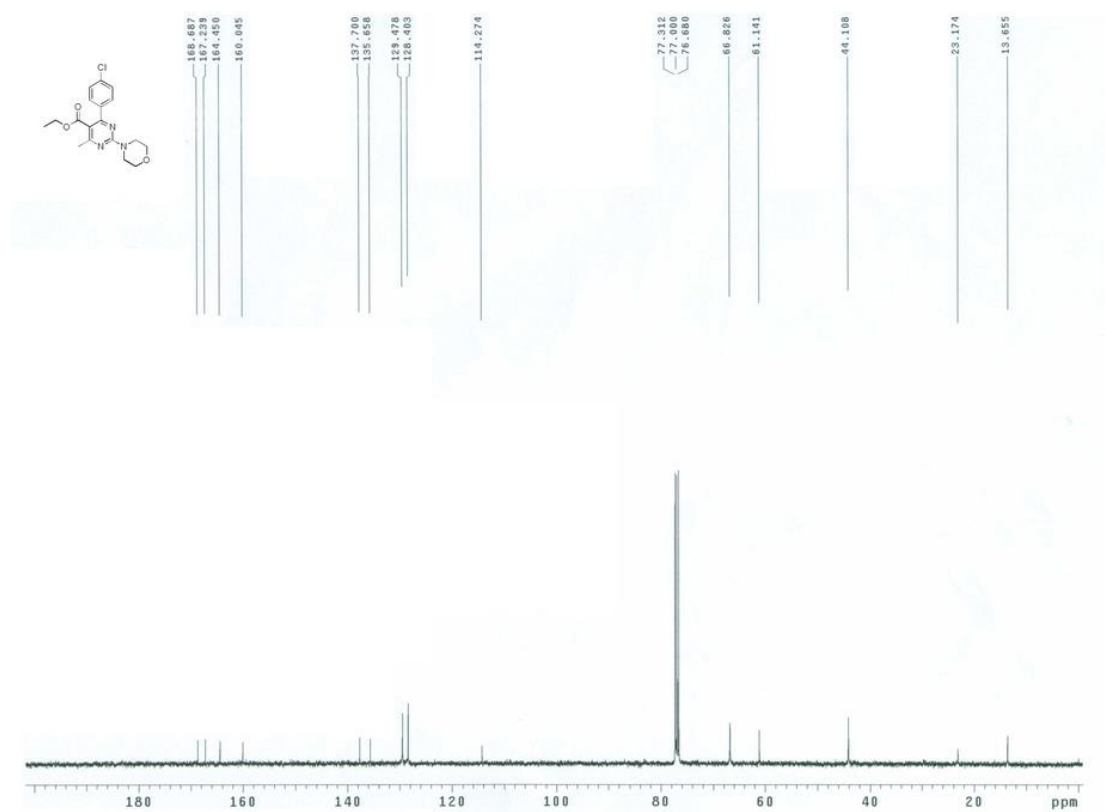



# <sup>1</sup>H and <sup>13</sup>C Spectra of compound 5e (CDCl<sub>3</sub>, 400 MHz)

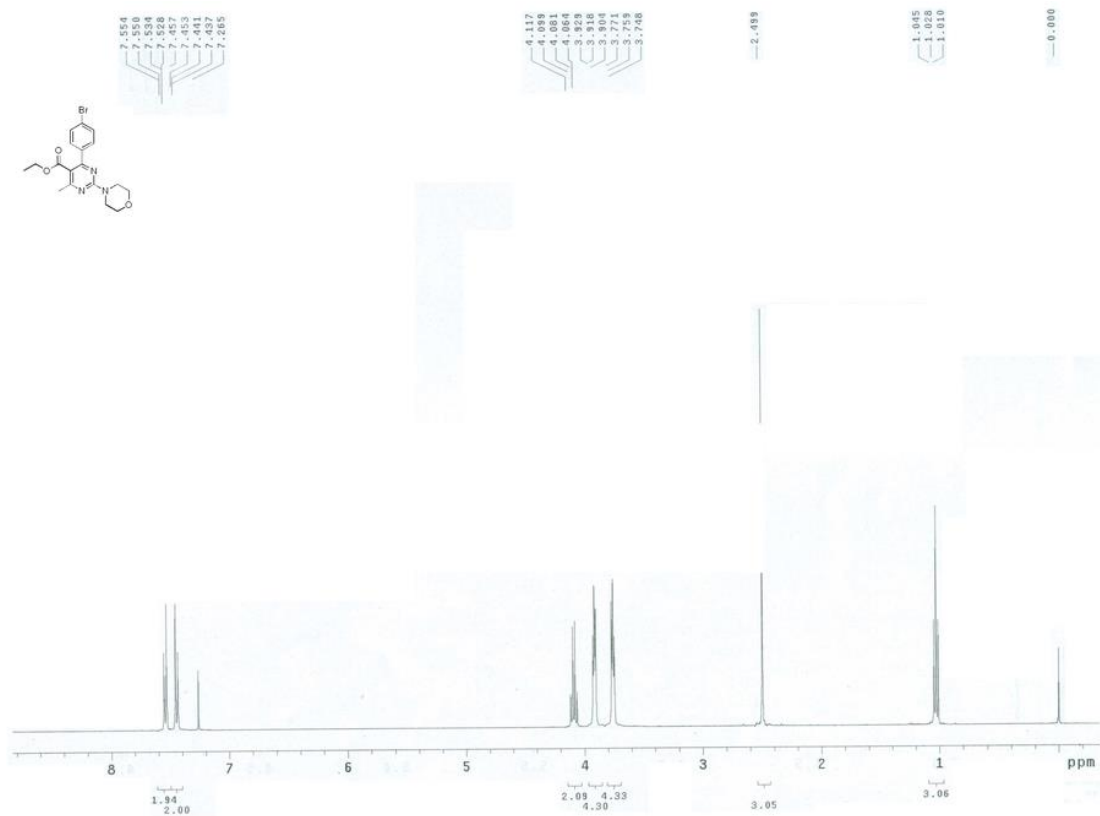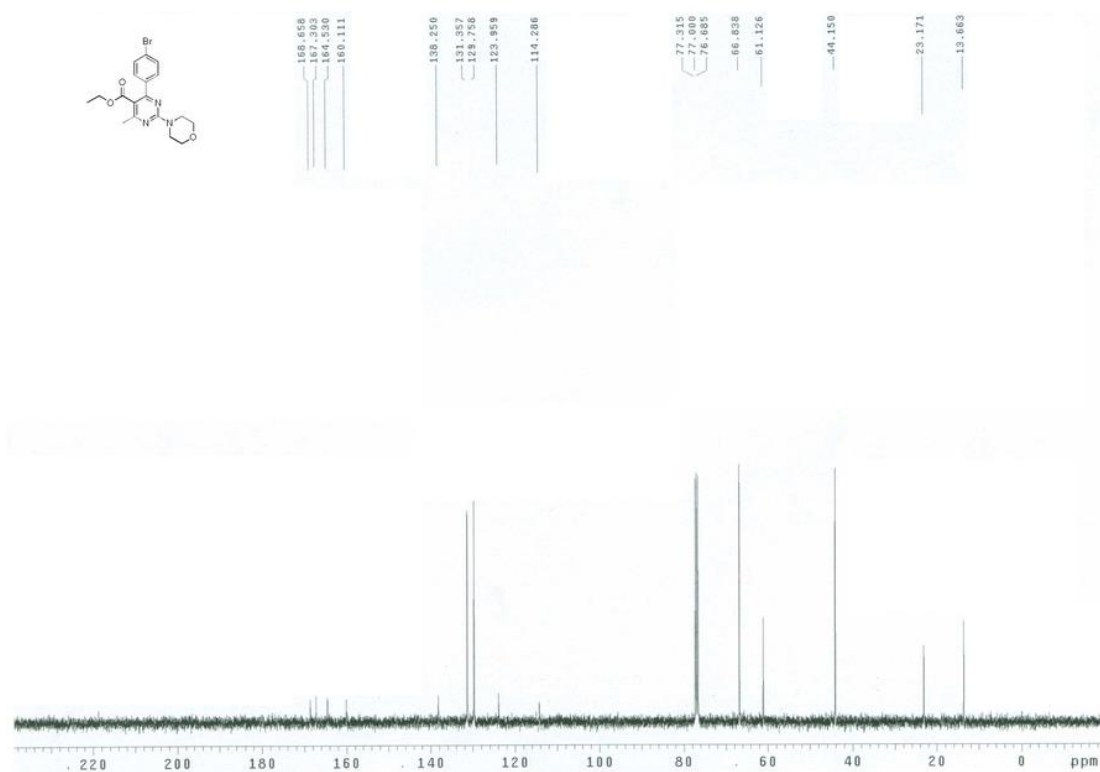

**<sup>1</sup>H and <sup>13</sup>C Spectra of compound 5f (CDCl<sub>3</sub>, 400 MHz)**

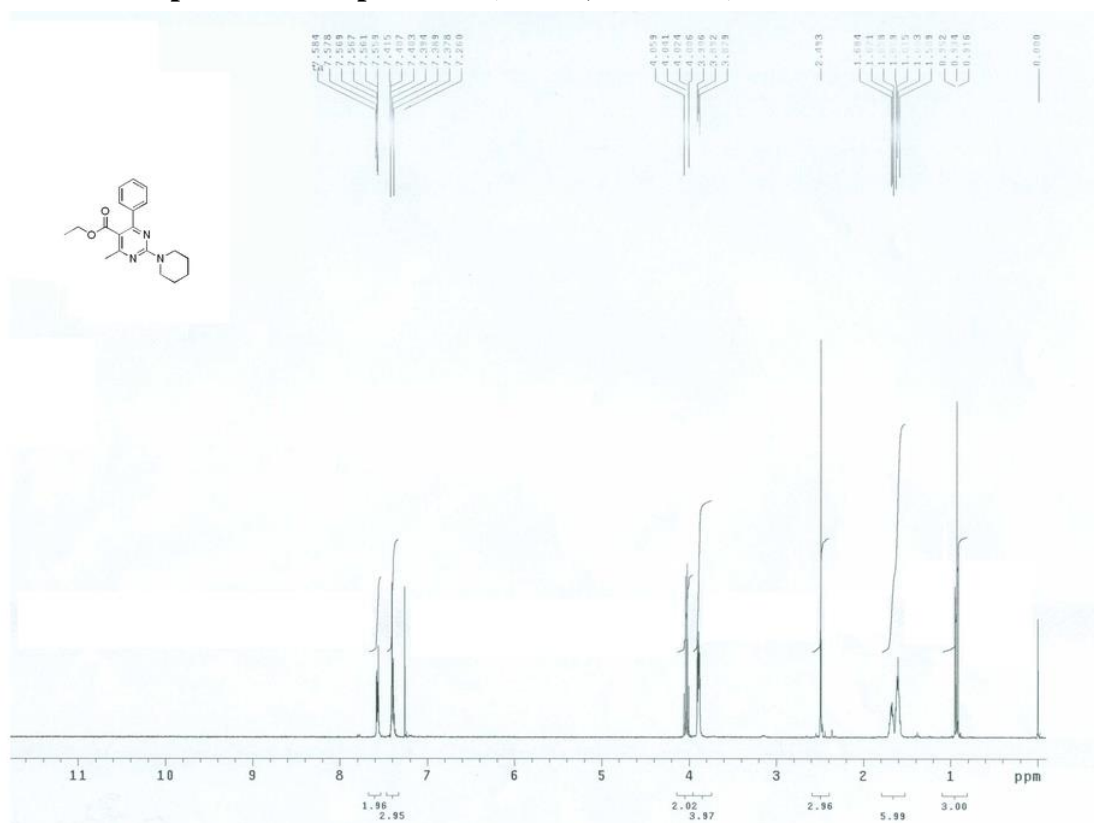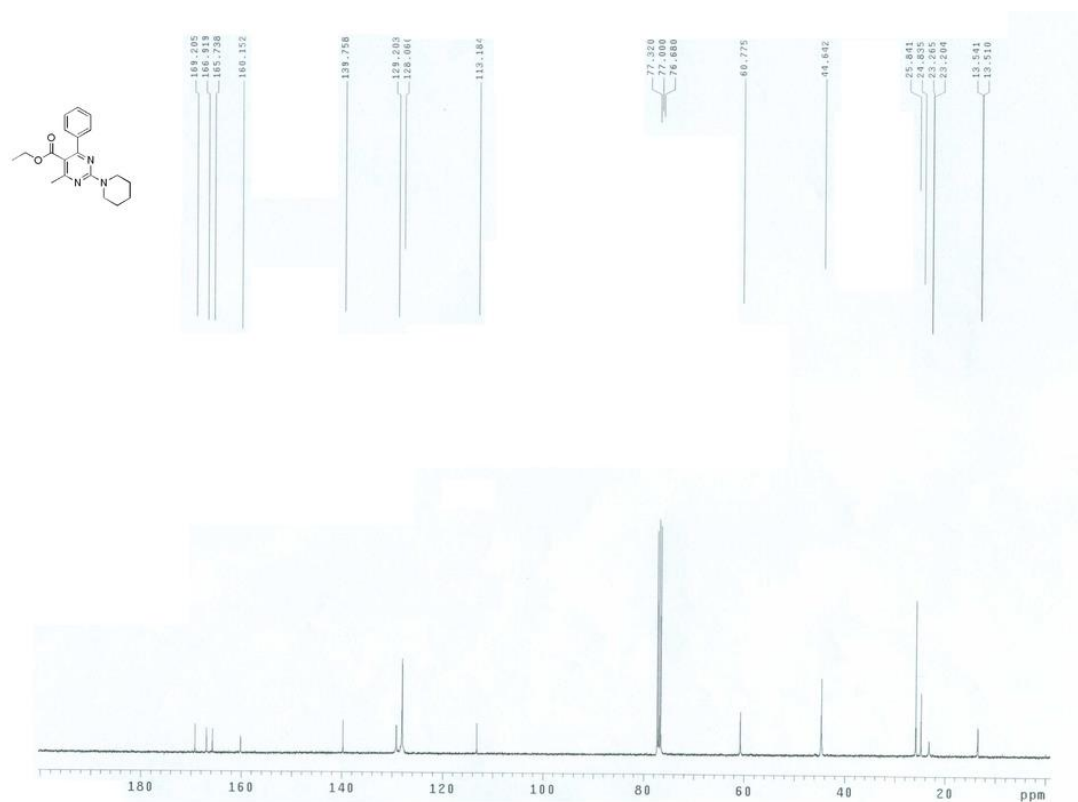

# $^1\text{H}$ and $^{13}\text{C}$ Spectra of compound 5g ( $\text{CDCl}_3$ , 400 MHz)

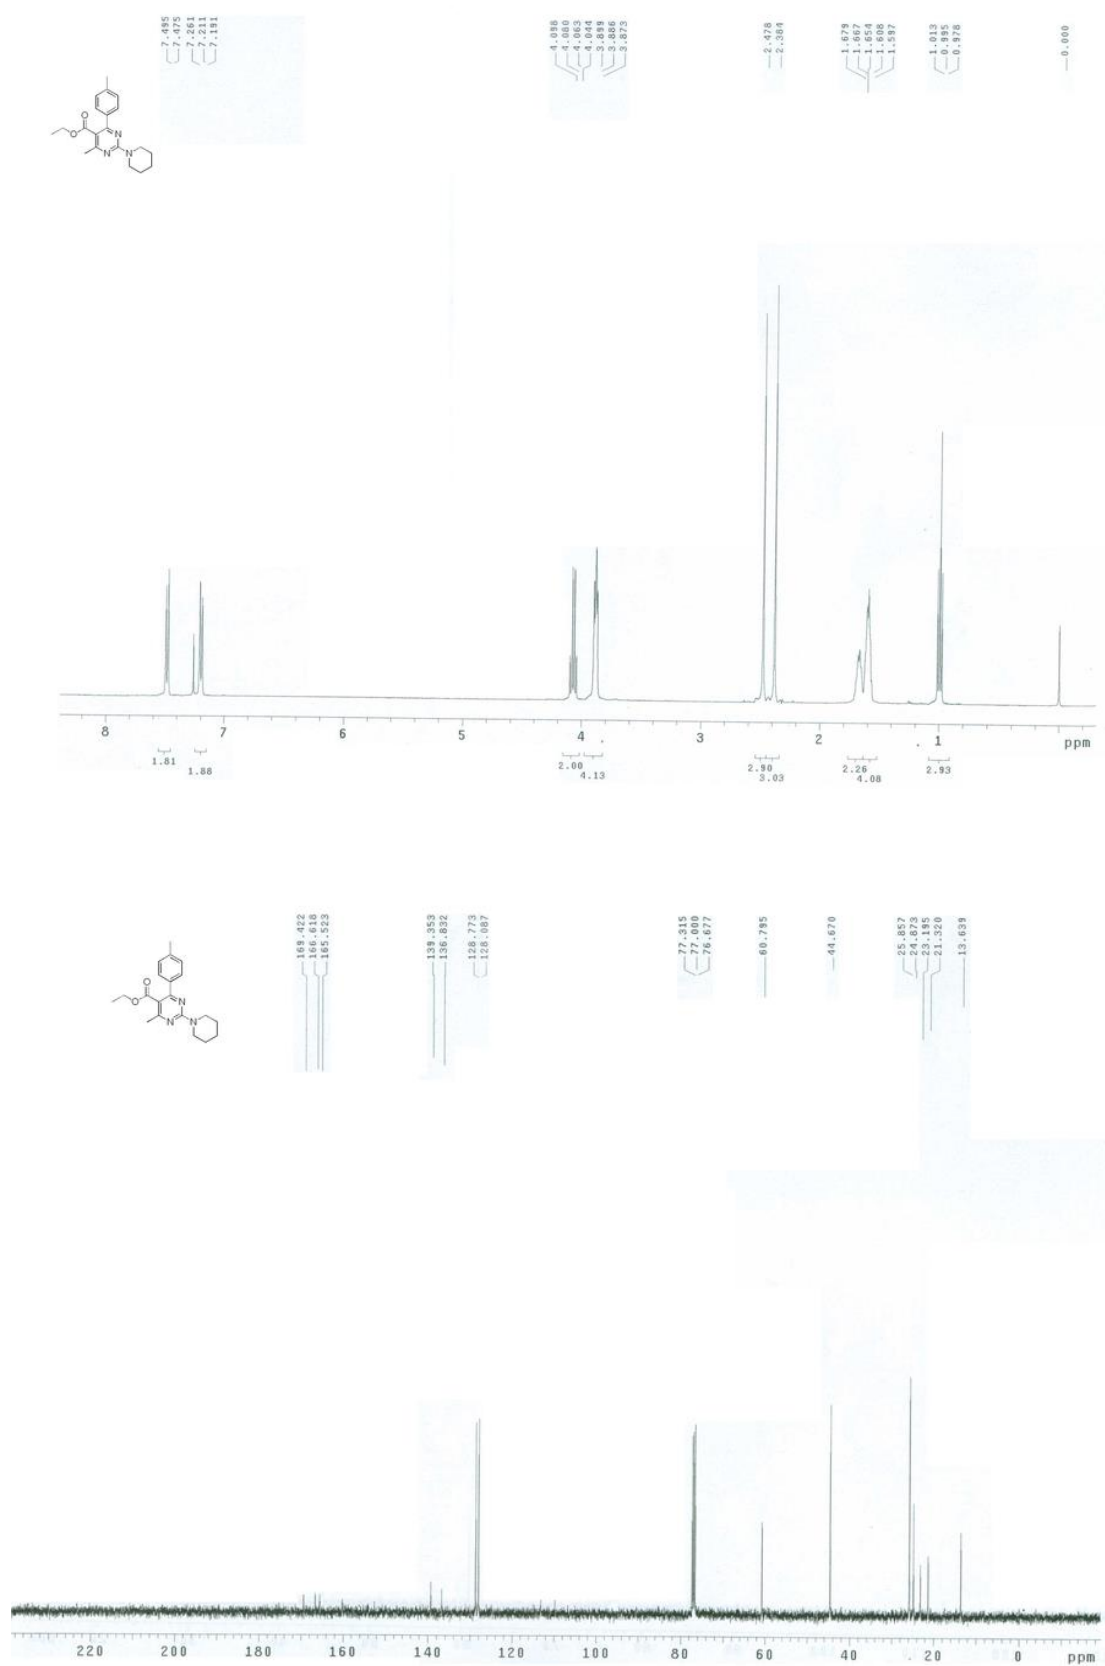

# $^1\text{H}$ and $^{13}\text{C}$ Spectra of compound 5h ( $\text{CDCl}_3$ , 400 MHz)

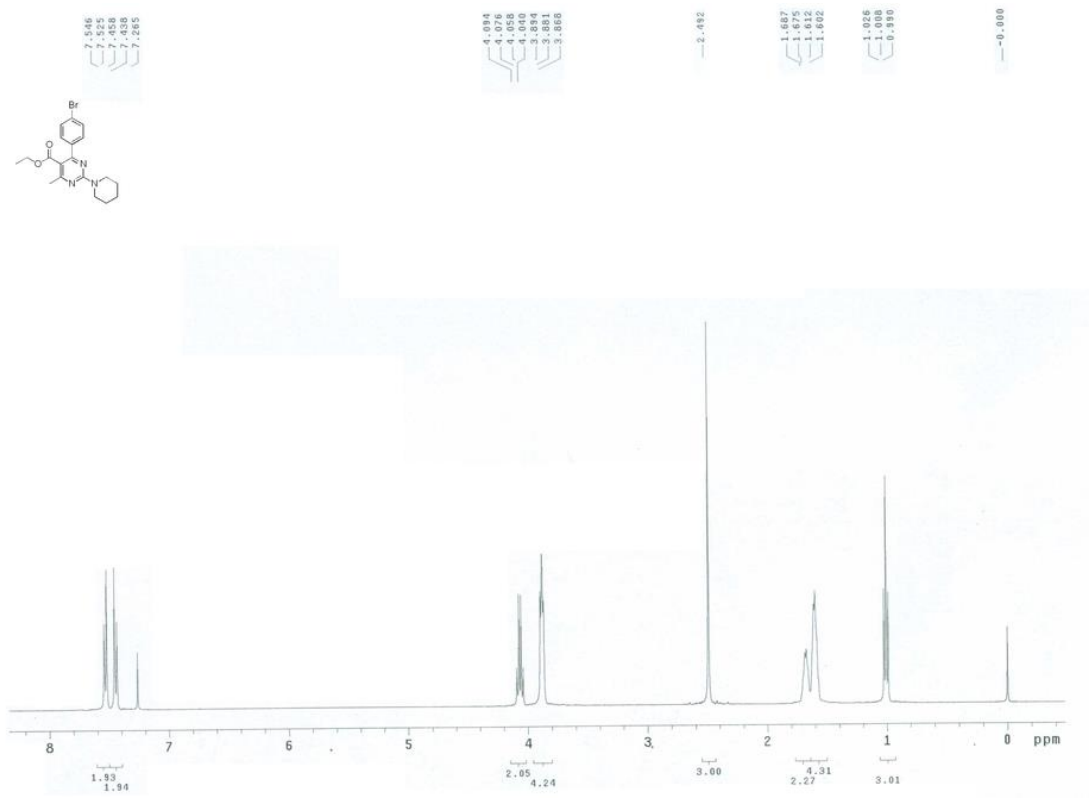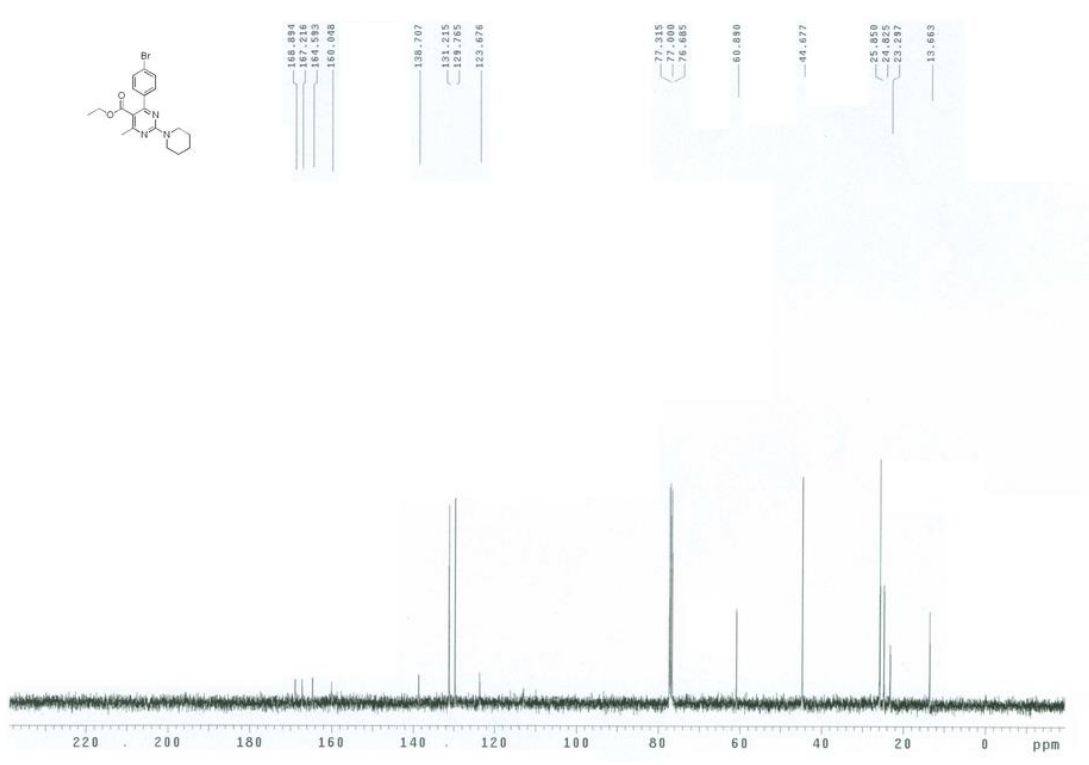

**<sup>1</sup>H and <sup>13</sup>C Spectra of compound 5i (CDCl<sub>3</sub>, 400 MHz)**

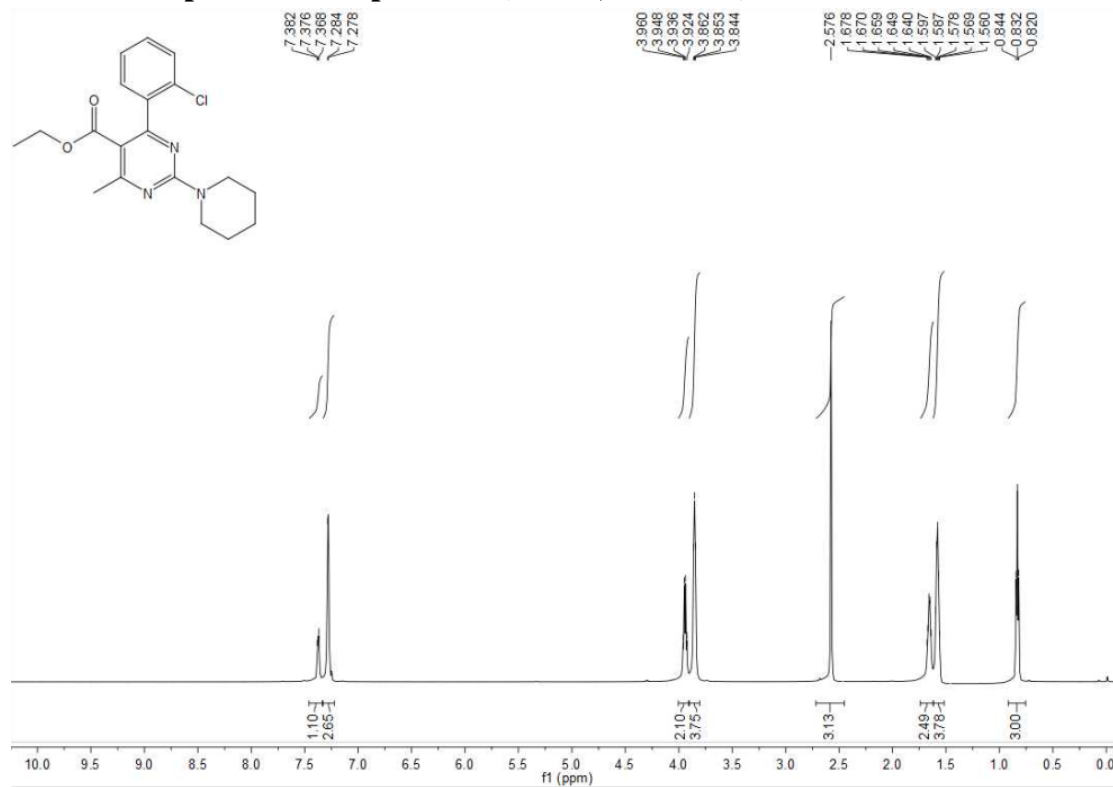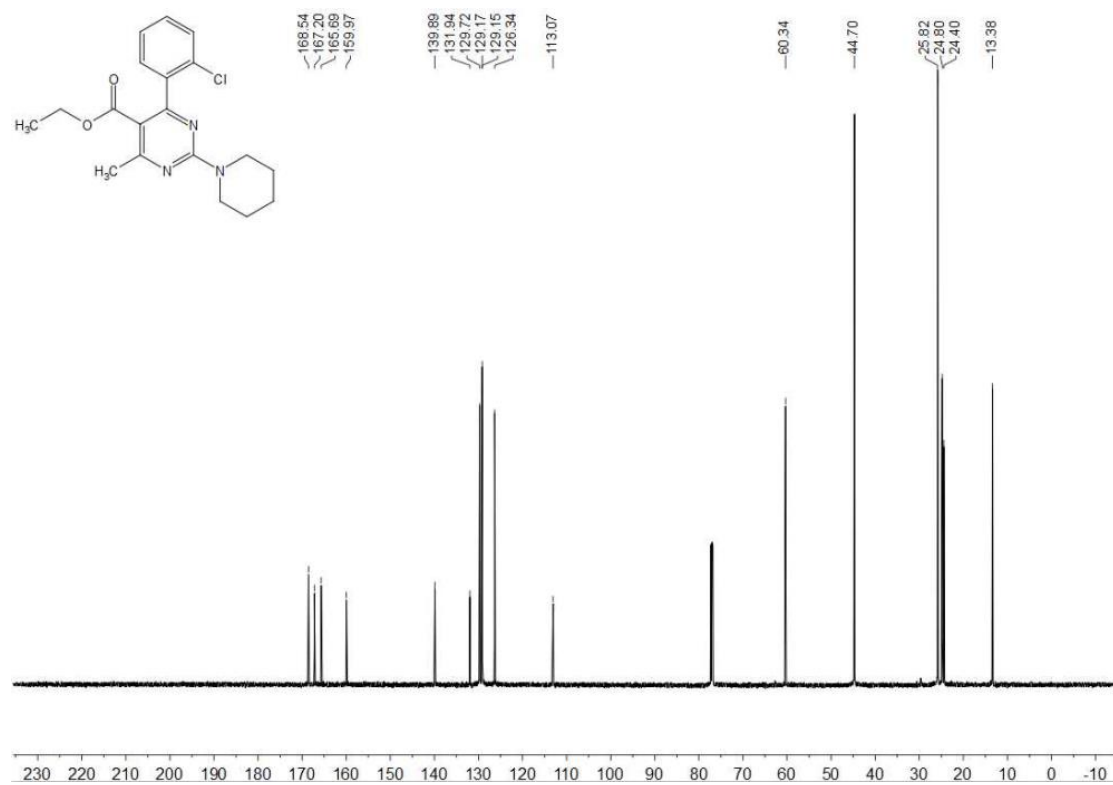

# <sup>1</sup>H and <sup>13</sup>C Spectra of compound 5j (CDCl<sub>3</sub>, 400 MHz)

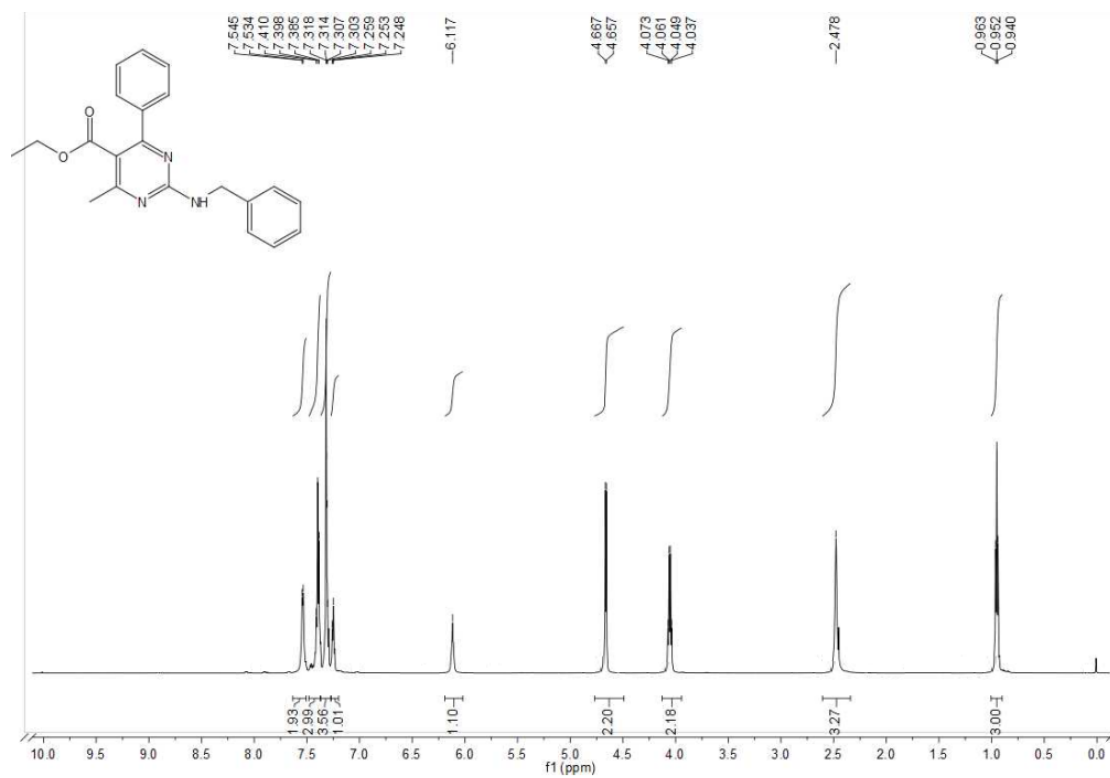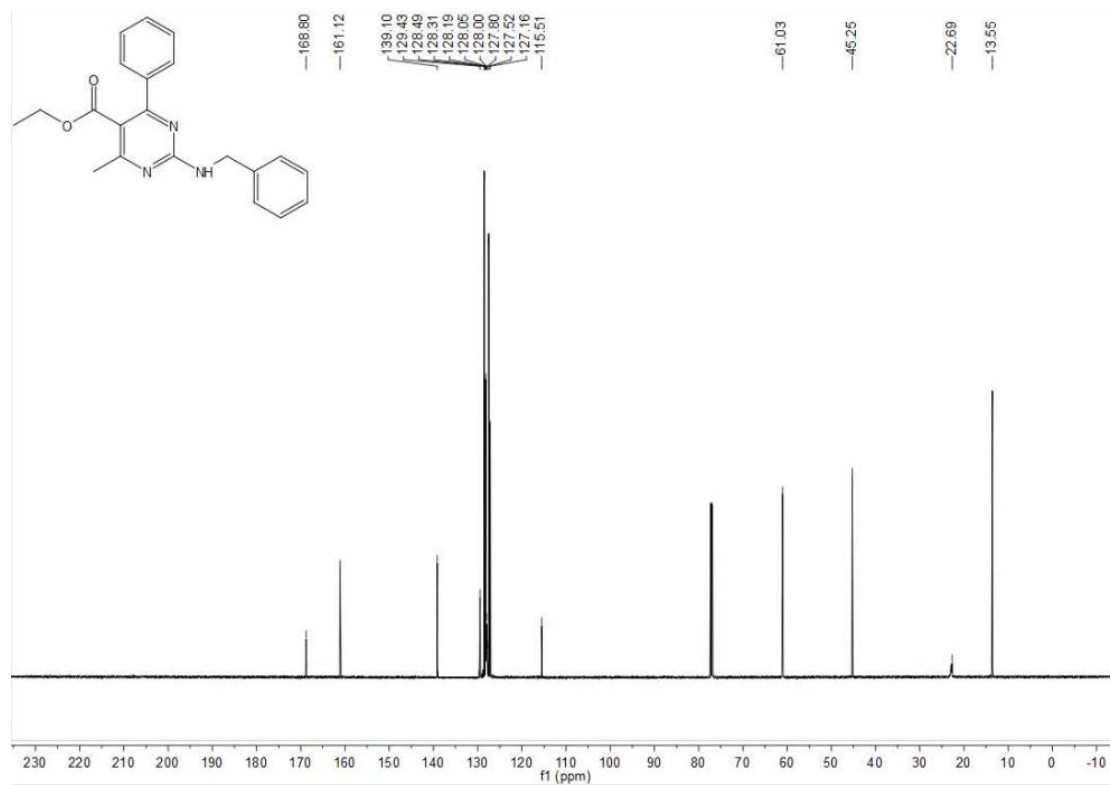

**<sup>1</sup>H and <sup>13</sup>C Spectra of compound 5k (CDCl<sub>3</sub>, 600 MHz)**

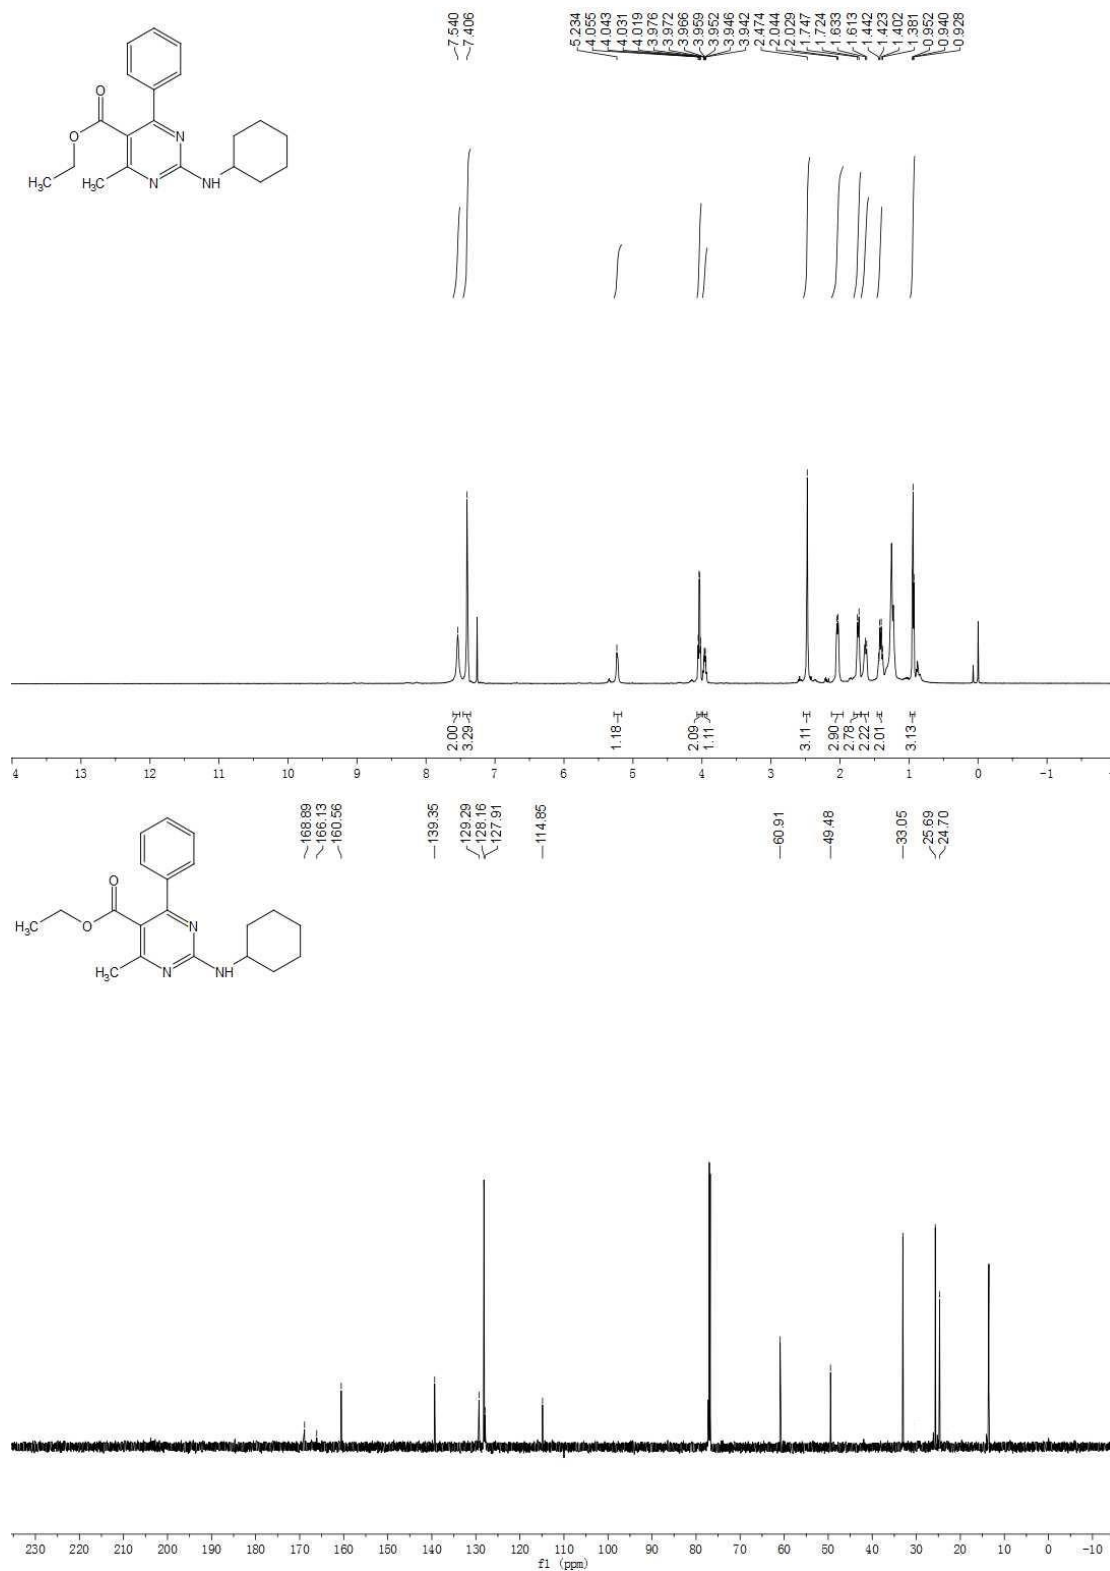

# <sup>1</sup>H and <sup>13</sup>C Spectra of compound 5l (CDCl<sub>3</sub>, 400 MHz)

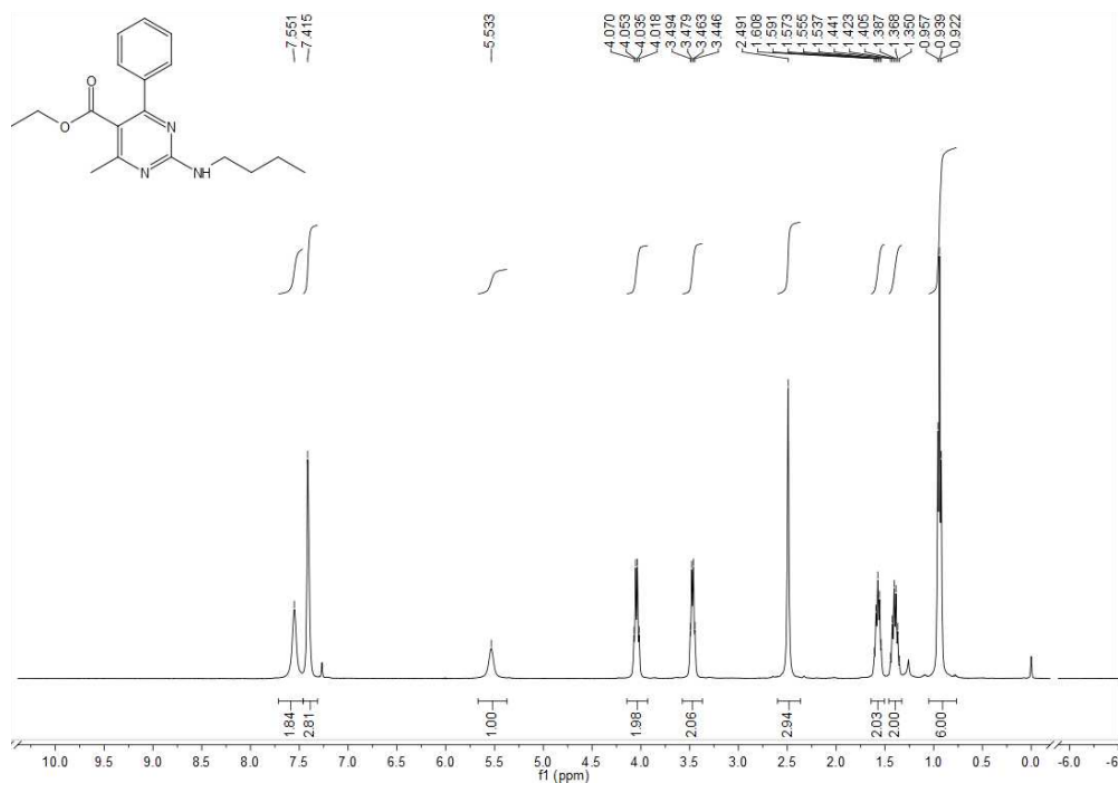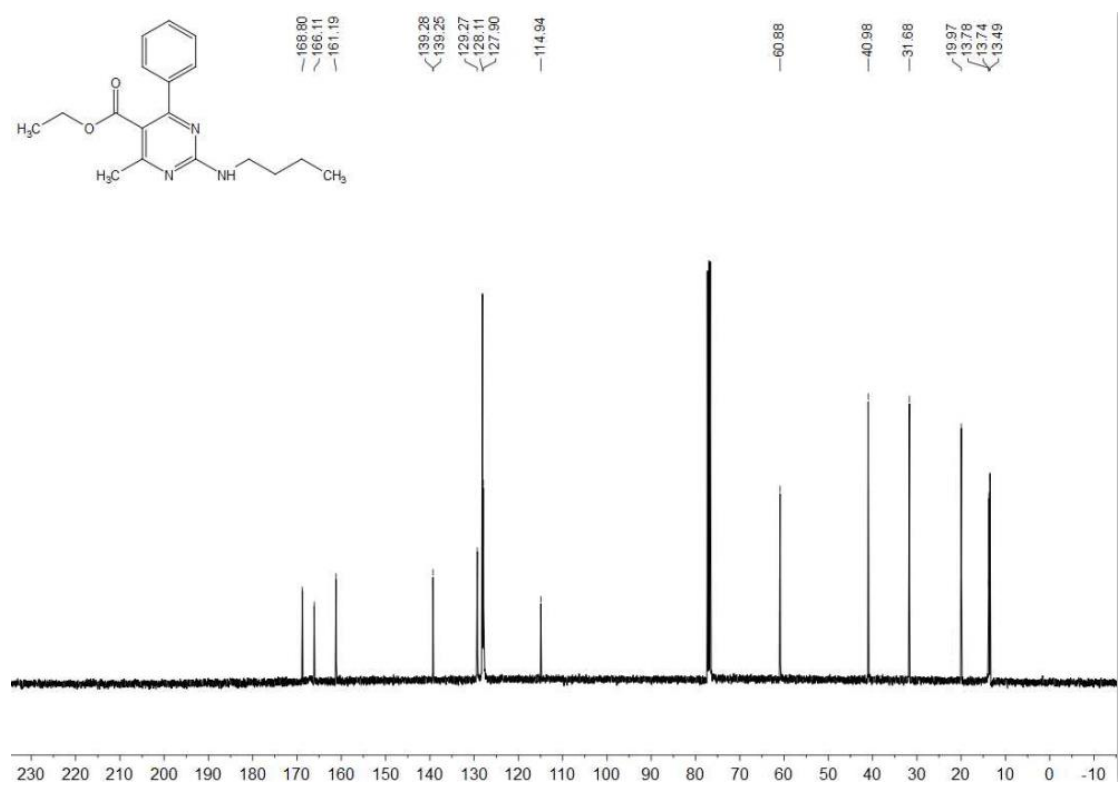



# <sup>1</sup>H and <sup>13</sup>C Spectra of compound 6a (CDCl<sub>3</sub>, 400 MHz)

c

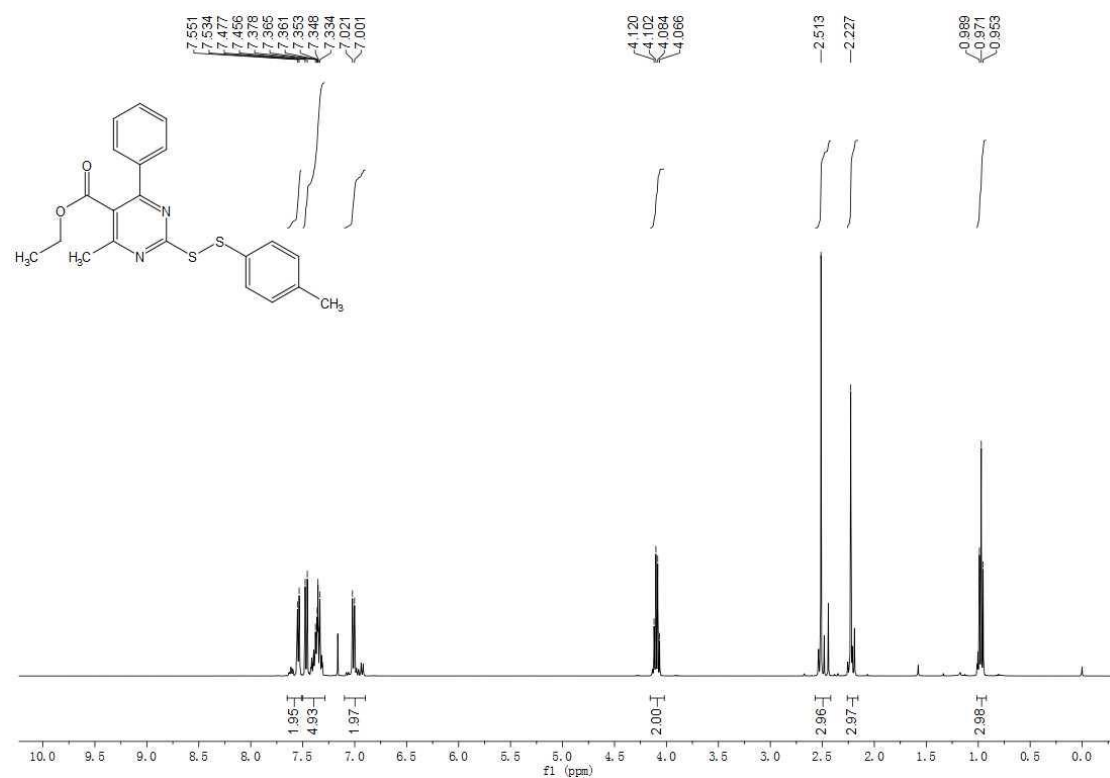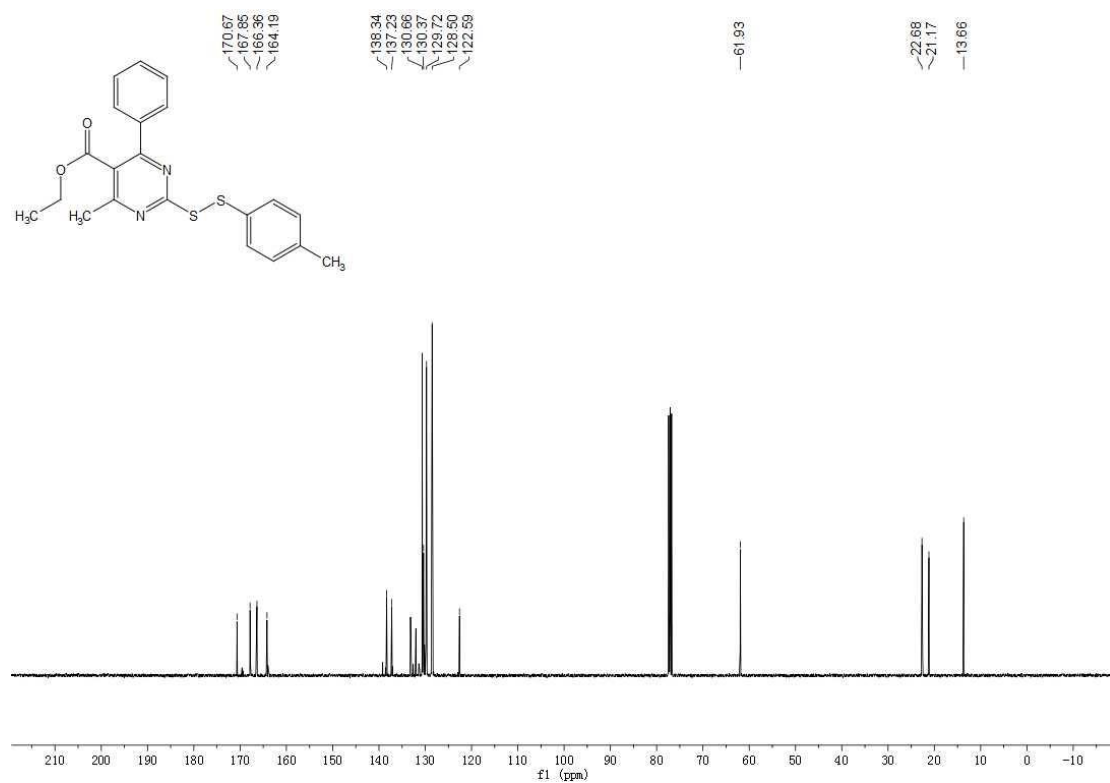

**$^1\text{H}$  and  $^{13}\text{C}$  Spectra of compound 6b (CDCl<sub>3</sub>, 400 MHz)**

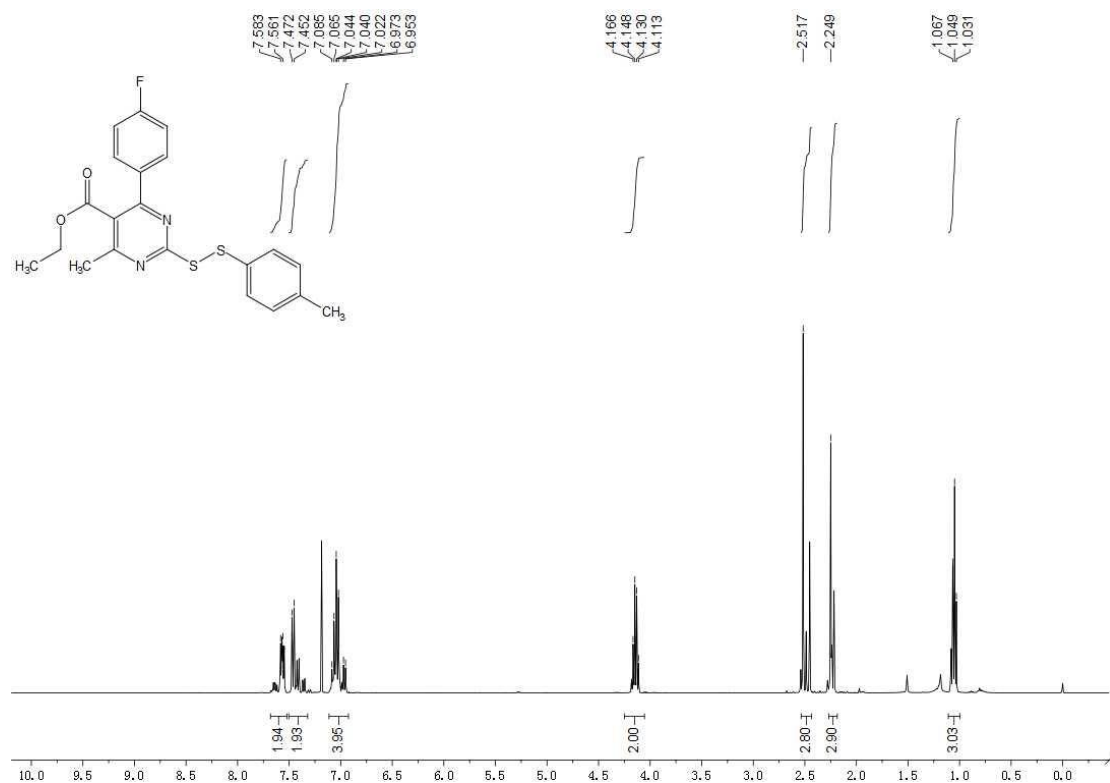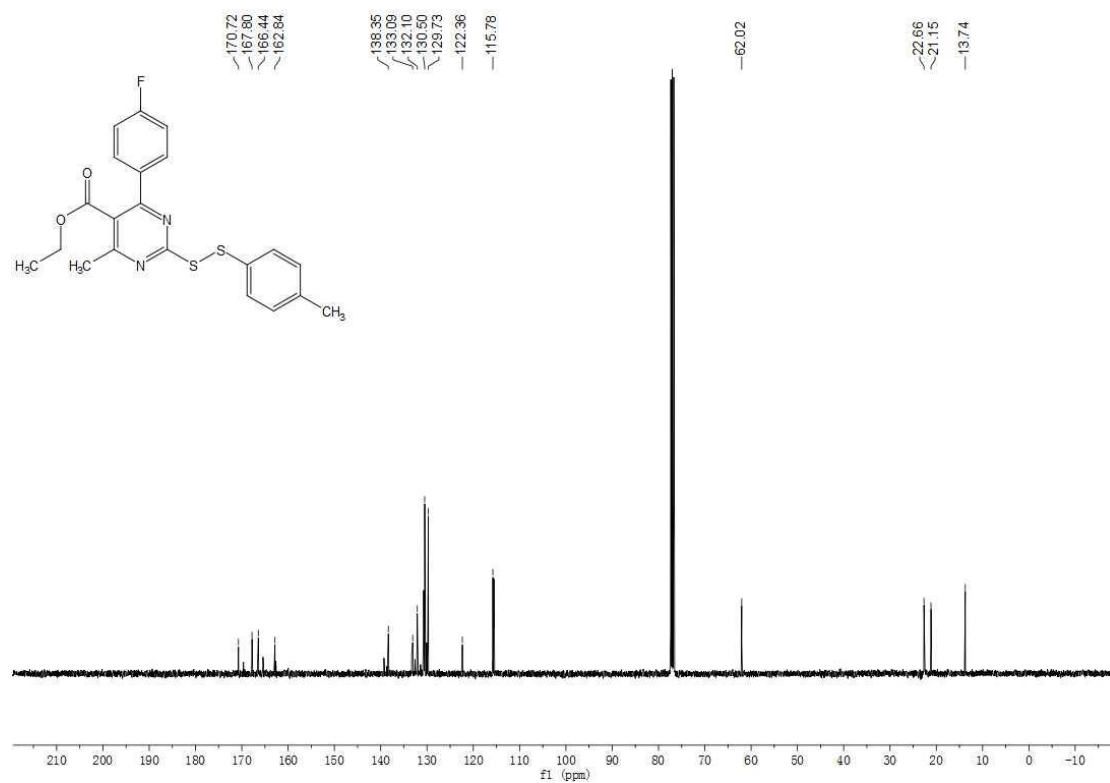

Supplement: c5ob02535d1.pdf [file c5ob02535d1.pdf]
